# Supplementary material for: Redox-neutral rhodium( iii )-catalyzed [4 + 1] annulation of N -aryl phthalazinediones with alkynes
Source: Royal Society of Chemistry journal article supplement (doi:10.1039/d5ob01380a), 2025-01-01

## Supporting Information

### Redox-neutral rhodium(III)-catalyzed [4+1] annulation of *N*-aryl phthalazinediones with alkynes

Xiuwen Jia,<sup>a,b</sup> Pinyi Li,<sup>b</sup> Fei Zhao<sup>\*b</sup> and Siyu Liu<sup>\*b</sup>

<sup>a</sup> Key Laboratory of Novel Food Resources Processing Ministry of Agriculture, Institute of Food & Nutrition Science and Technology, Institute of Industrial Crops, Shandong Academy of Agricultural Sciences, Jinan, 250100, China.

<sup>b</sup> Antibiotics Research and Re-evaluation Key Laboratory of Sichuan Province, Sichuan Industrial Institute of Antibiotics, School of Pharmacy, Chengdu University, Chengdu, 610106, China, Email: zhaofei@cdu.edu.cn; siyu.liu.sia@gmail.com.

## CONTENTS

|                                                                                         |    |
|-----------------------------------------------------------------------------------------|----|
| General Information.....                                                                | 2  |
| Preparation of the Starting Materials .....                                             | 2  |
| General Procedure for the Rh(III)-Catalyzed [4+1] Annulation.....                       | 2  |
| Characterization Data of Products <b>3</b> .....                                        | 2  |
| Gram Scale Synthesis of Compound <b>3a</b> .....                                        | 15 |
| Deuterium Incorporation Experiments of Rh(III)-Catalyzed [4+1] Annulation.....          | 15 |
| Determination of the KIE.....                                                           | 16 |
| Synthetic procedure for Rh-complex .....                                                | 17 |
| Possible Intermediates and Side Products Trapped by HRMS .....                          | 19 |
| X-ray Data of Compound <b>3p</b> .....                                                  | 20 |
| Table S1 Crystal data and structure refinement for <b>3p</b> . .....                    | 21 |
| References.....                                                                         | 22 |
| Copies for <sup>1</sup> H NMR, <sup>13</sup> C NMR and <sup>19</sup> F NMR spectra..... | 23 |

## General Information

If not otherwise specified, the reagents were obtained from commercial sources and used directly without purification. Heating source: all the reactions that require heating were carried out in an oil bath. Analytical thin-layer chromatography (TLC): HSGF 254 (0.15-0.2 mm thickness). Detection under UV light at 254 nm. Column chromatography: separations were carried out on silica gel FCP 200-300. Yields refer to isolated yields. Melting point apparatus: a micro melting point apparatus, values are uncorrected. Nuclear magnetic resonance (NMR) apparatus: a Bruker 400, 500 or 600 MHz instrument. Chemical shifts ( $\delta$ ) are given in ppm. Proton coupling patterns were recorded as singlet (s), doublet (d), triplet (t), quartet (q), and multiplet (m). HRMS (high-resolution mass) were measured on a Thermo Scientific LTQ Orbitrap Discovery (Bremen, Germany). The linear ion trap (LTQ) part of the hybrid MS system was equipped with electrospray ionization (ESI) probe and operated in both positive and negative ion modes.

## Preparation of the Starting Materials

All the 2-phenyl-2,3-dihydrophthalazine-1,4-diones substrates were prepared according to the literature procedure and their characterization data were in accordance with the published ones.<sup>1,2</sup>

All the  $\alpha,\alpha$ -difluoromethylene alkyne substrates were prepared according to the literature procedure and their characterization data were in accordance with the published ones.<sup>3,4</sup>

## General Procedure for the Rh(III)-Catalyzed [4+1] Annulation

To a mixture of 2-arylphthalazine-1,4-diones **1** (0.25 mmol),  $[\text{Cp}^*\text{RhCl}_2]_2$  (5 mol%) and KF (0.25 mmol) in a 25 mL Schlenk tube was added a solution of alkynes **2** (0.325 mmol) in MeOH (4.0 mL). Then the tube was capped with septa, and the resulting mixture was stirred at appropriate temperature for appropriate time indicated in Scheme 2. After removal of the solvent, the residue was purified by flash chromatography on silica gel to provide the desired products **3**.

## Characterization Data of Products 3

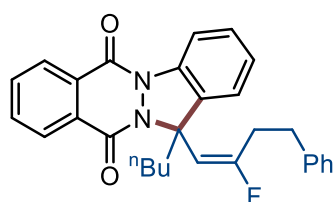

**(E)-13-butyl-13-(2-fluoro-4-phenylbut-1-en-1-yl)-13H-indazolo[1,2-b]phthalazine-6,11-dione (3a):** The reaction mixture was subjected directly to flash chromatography (Petroleum/EtOAc: 15:1) on silica gel to provide the product as a colorless viscous oil (95.5 mg, yield 84%). <sup>1</sup>H NMR (600 MHz, CDCl<sub>3</sub>)  $\delta$  8.47 (d,  $J$  = 8.1 Hz, 1H), 8.42-8.39 (m, 1H), 8.33-8.28 (m, 1H), 7.88-7.83 (m, 2H), 7.52-7.47 (m, 1H), 7.33-7.30 (m, 1H), 7.21-7.19 (m, 1H), 6.98-6.92 (m, 2H), 6.80-6.74 (m, 1H), 6.66 (d,  $J$  = 7.0 Hz, 2H), 5.99 (d,  $J$  = 22.4 Hz, 1H), 2.99-2.93 (m, 1H), 2.49-2.43 (m, 1H), 2.30-2.25 (m, 1H), 1.99-1.94 (m, 1H), 1.92-1.83 (m, 1H), 1.79-1.69 (m, 1H), 1.24-1.09 (m, 2H), 0.97-0.90 (m,

1H), 0.88-0.82 (m, 1H), 0.70 (t,  $J = 7.3$  Hz, 3H);  $^{13}\text{C}$  NMR (150 MHz,  $\text{CDCl}_3$ )  $\delta$  163.3 (d,  $J_{\text{C-F}} = 255.6$  Hz), 154.7, 154.0, 140.0, 136.1, 133.7, 133.4, 131.2, 129.71, 129.70, 129.2, 128.3, 128.1, 127.7, 127.6, 126.9, 126.0, 122.5, 115.9, 111.3 (d,  $J_{\text{C-F}} = 29.1$  Hz), 70.9 (d,  $J_{\text{C-F}} = 14.7$  Hz), 39.6, 31.8 (d,  $J_{\text{C-F}} = 26.7$  Hz), 31.3, 25.1, 22.2, 13.9;  $^{19}\text{F}$  NMR (565 MHz,  $\text{CDCl}_3$ )  $\delta$  -95.9; HRMS (ESI)  $m/z$ :  $[\text{M} + \text{H}]^+$  Calculated for  $\text{C}_{29}\text{H}_{28}\text{FN}_2\text{O}_2^+$  455.2129; Found 455.2136.

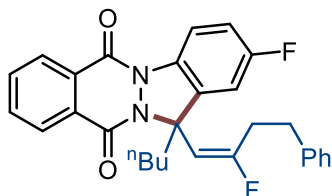

**(E)-13-butyl-2-fluoro-13-(2-fluoro-4-phenylbut-1-en-1-yl)-13H-indazolo[1,2-b]phthalazine-6,11-dione (3b):** The reaction mixture was subjected directly to flash chromatography (Petroleum/EtOAc: 15:1) on silica gel to provide the product as a light yellow viscous oil (68.2 mg, yield 57%).  $^1\text{H}$  NMR (600 MHz,  $\text{CDCl}_3$ )  $\delta$  8.44 (dd,  $J = 8.9, 4.5$  Hz, 1H), 8.41-8.38 (m, 1H), 8.32-8.26 (m, 1H), 7.89-7.84 (m, 2H), 7.19-7.16 (m, 1H), 6.98-6.94 (m, 2H), 6.85 (dd,  $J = 7.5, 2.6$  Hz, 1H), 6.80-6.76 (m, 1H), 6.69 (d,  $J = 7.3$  Hz, 2H), 5.93 (d,  $J = 22.0$  Hz, 1H), 3.00-2.93 (m, 1H), 2.52-2.47 (m, 1H), 2.39-2.34 (m, 1H), 1.97-1.88 (m, 2H), 1.85-1.75 (m, 1H), 1.23-1.12 (m, 2H), 0.95-0.88 (m, 1H), 0.72-0.65 (m, 4H);  $^{13}\text{C}$  NMR (150 MHz,  $\text{CDCl}_3$ )  $\delta$  163.3 (d,  $J_{\text{C-F}} = 256.5$  Hz), 161.1 (d,  $J_{\text{C-F}} = 247.6$  Hz), 154.5, 154.0, 139.8, 133.8, 133.6, 133.3 (d,  $J_{\text{C-F}} = 8.4$  Hz), 132.3 (d,  $J_{\text{C-F}} = 2.2$  Hz), 129.6, 129.0, 128.3, 128.0, 127.8, 127.5, 126.1, 117.3 (d,  $J_{\text{C-F}} = 8.3$  Hz), 116.7 (d,  $J_{\text{C-F}} = 23.5$  Hz), 111.0 (d,  $J_{\text{C-F}} = 29.7$  Hz), 109.9 (d,  $J_{\text{C-F}} = 25.4$  Hz), 70.7 (dd,  $J_{\text{C-F}} = 14.8, 2.4$  Hz), 39.5, 31.9 (d,  $J_{\text{C-F}} = 26.8$  Hz), 31.2, 25.0, 22.2, 13.9;  $^{19}\text{F}$  NMR (377 MHz,  $\text{CDCl}_3$ )  $\delta$  -95.4, -113.2; HRMS (ESI)  $m/z$ :  $[\text{M} + \text{H}]^+$  Calculated for  $\text{C}_{29}\text{H}_{27}\text{F}_2\text{N}_2\text{O}_2^+$  473.2035; Found 473.2035.

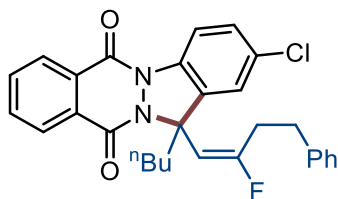

**(E)-13-butyl-2-chloro-13-(2-fluoro-4-phenylbut-1-en-1-yl)-13H-indazolo[1,2-b]phthalazine-6,11-dione (3c):** The reaction mixture was subjected directly to flash chromatography (Petroleum/EtOAc: 15:1) on silica gel to provide the product as a light yellow viscous oil (55.0 mg, yield 45%).  $^1\text{H}$  NMR (600 MHz,  $\text{CDCl}_3$ )  $\delta$  8.41-8.37 (m, 2H), 8.31-8.28 (m, 1H), 7.89-7.84 (m, 2H), 7.48-7.41 (m, 1H), 7.18-7.16 (m, 1H), 6.98-6.94 (m, 2H), 6.80-6.76 (m, 1H), 6.69 (d,  $J = 7.7$  Hz, 2H), 5.93 (d,  $J = 22.1$  Hz, 1H), 2.99-2.93 (m, 1H), 2.54-2.48 (m, 1H), 2.38-2.32 (m, 1H), 1.96-1.88 (m, 2H), 1.84-1.74 (m, 1H), 1.24-1.13 (m, 2H), 0.96-0.89 (m, 1H), 0.75-0.68 (m, 4H);  $^{13}\text{C}$  NMR (150 MHz,  $\text{CDCl}_3$ )  $\delta$  163.4 (d,  $J_{\text{C-F}} = 256.5$  Hz), 154.7, 153.9, 139.8, 134.6, 133.9, 133.6, 133.1, 132.2, 129.9, 129.5, 129.1, 128.3, 128.0, 127.8, 127.6, 126.2, 122.7, 116.9, 111.0 (d,  $J_{\text{C-F}} = 29.7$  Hz), 70.7 (d,  $J_{\text{C-F}} = 14.8$  Hz), 39.6, 32.0 (d,  $J_{\text{C-F}} = 26.9$  Hz), 31.3, 25.1, 22.2, 13.9;  $^{19}\text{F}$  NMR

(565 MHz, CDCl<sub>3</sub>) δ -95.3; HRMS (ESI) m/z: [M + H]<sup>+</sup> Calculated for C<sub>29</sub>H<sub>27</sub>ClFN<sub>2</sub>O<sub>2</sub><sup>+</sup> 489.1740; Found 489.1746.

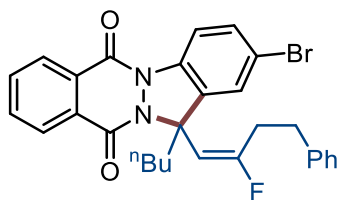

**(E)-2-bromo-13-butyl-13-(2-fluoro-4-phenylbut-1-en-1-yl)-13H-indazolo[1,2-b]phthalazine-6,11-dione (3d):** The reaction mixture was subjected directly to flash chromatography (Petroleum/EtOAc: 15:1) on silica gel to provide the product as a light yellow viscous oil (78.7 mg, yield 59%). <sup>1</sup>H NMR (600 MHz, CDCl<sub>3</sub>) δ 8.41-8.37 (m, 1H), 8.33 (d, *J* = 8.6 Hz, 1H), 8.31-8.27 (m, 1H), 7.90-7.84 (m, 2H), 7.60 (dd, *J* = 8.7, 2.0 Hz, 1H), 7.33 (d, *J* = 2.0 Hz, 1H), 7.00-6.92 (m, 2H), 6.81-6.75 (m, 1H), 6.69 (d, *J* = 7.3 Hz, 2H), 5.93 (d, *J* = 22.1 Hz, 1H), 3.05-2.86 (m, 1H), 2.58-2.43 (m, 1H), 2.39-2.30 (m, 1H), 1.98-1.88 (m, 2H), 1.84-1.73 (m, 1H), 1.24-1.14 (m, 2H), 0.95-0.86 (m, 1H), 0.75-0.68 (m, 4H); <sup>13</sup>C NMR (150 MHz, CDCl<sub>3</sub>) δ 163.4 (d, *J*<sub>C-F</sub> = 256.8 Hz), 154.7, 153.8, 139.8, 135.1, 133.9, 133.6, 133.4, 132.8, 129.5, 129.2, 128.3, 128.0, 127.8, 127.6, 126.2, 125.6, 119.6, 117.2, 111.0 (d, *J*<sub>C-F</sub> = 29.5 Hz), 70.6 (d, *J*<sub>C-F</sub> = 14.6 Hz), 39.6, 32.0 (d, *J*<sub>C-F</sub> = 26.6 Hz), 31.3, 25.1, 22.2, 14.0; <sup>19</sup>F NMR (377 MHz, CDCl<sub>3</sub>) δ -95.2; HRMS (ESI) m/z: [M + H]<sup>+</sup> Calculated for C<sub>29</sub>H<sub>27</sub>BrFN<sub>2</sub>O<sub>2</sub><sup>+</sup> 533.1234; Found 533.1243.

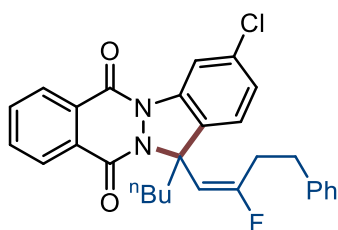

**(E)-13-butyl-3-chloro-13-(2-fluoro-4-phenylbut-1-en-1-yl)-13H-indazolo[1,2-b]phthalazine-6,11-dione (3e):** The reaction mixture was subjected directly to flash chromatography (Petroleum/EtOAc: 12:1) on silica gel to provide the product as a light yellow viscous oil (69.7 mg, yield 57%). <sup>1</sup>H NMR (600 MHz, CDCl<sub>3</sub>) δ 8.49 (d, *J* = 1.9 Hz, 1H), 8.42-8.36 (m, 1H), 8.33-8.25 (m, 1H), 7.89-7.85 (m, 2H), 7.25 (dd, *J* = 8.1, 1.9 Hz, 1H), 7.05 (d, *J* = 8.1 Hz, 1H), 7.02-6.91 (m, 2H), 6.82-6.74 (m, 1H), 6.69 (d, *J* = 7.5 Hz, 2H), 5.95 (d, *J* = 22.2 Hz, 1H), 2.96-2.90 (m, 1H), 2.52-2.46 (m, 1H), 2.38-2.33 (m, 1H), 1.95-1.90 (m, 1H), 1.90-1.76 (m, 2H), 1.24-1.10 (m, 2H), 0.96-0.87 (m, 1H), 0.74-0.66 (m, 4H); <sup>13</sup>C NMR (150 MHz, CDCl<sub>3</sub>) δ 163.3 (d, *J*<sub>C-F</sub> = 256.4 Hz), 154.9, 153.9, 139.8, 136.8, 135.4, 134.0, 133.6, 129.6, 129.4, 129.2, 128.4, 128.1, 127.8, 127.7, 127.0, 126.1, 123.3, 116.1, 111.2 (d, *J*<sub>C-F</sub> = 29.3 Hz), 70.8 (d, *J*<sub>C-F</sub> = 14.8 Hz), 39.6, 32.0 (d, *J*<sub>C-F</sub> = 26.7 Hz), 31.2, 25.0, 22.2, 13.9; <sup>19</sup>F NMR (565 MHz, CDCl<sub>3</sub>) δ -95.7; HRMS (ESI) m/z: [M + H]<sup>+</sup> Calculated for C<sub>29</sub>H<sub>27</sub>ClFN<sub>2</sub>O<sub>2</sub><sup>+</sup> 489.1740; Found 489.1741.



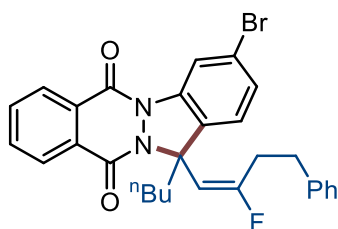

**(E)-3-bromo-13-butyl-13-(2-fluoro-4-phenylbut-1-en-1-yl)-13H-indazolo[1,2-*b*]phthalazine-6,11-dione (3f):** The reaction mixture was subjected directly to flash chromatography (Petroleum/EtOAc: 12:1) on silica gel to provide the product as a light yellow viscous oil (66.7 mg, yield 50%). **<sup>1</sup>H NMR (600 MHz, CDCl<sub>3</sub>)** δ 8.65 (d, *J* = 1.8 Hz, 1H), 8.41-8.36 (m, 1H), 8.32-8.26 (m, 1H), 7.89-7.85 (m, 2H), 7.40 (dd, *J* = 8.1, 1.8 Hz, 1H), 7.03-6.96 (m, 3H), 6.82-6.76 (m, 1H), 6.72-6.66 (m, 2H), 5.94 (d, *J* = 22.2 Hz, 1H), 2.97-2.89 (m, 1H), 2.53-2.46 (m, 1H), 2.38-2.32 (m, 1H), 1.95-1.77 (m, 3H), 1.23-1.11 (m, 2H), 0.96-0.89 (m, 1H), 0.74-0.66 (m, 4H); **<sup>13</sup>C NMR (150 MHz, CDCl<sub>3</sub>)** δ 163.3 (d, *J*<sub>C-F</sub> = 256.4 Hz), 154.9, 153.9, 139.8, 137.0, 134.0, 133.6, 130.2, 129.9, 129.4, 129.2, 128.4, 128.1, 127.8, 127.7, 126.1, 123.6, 123.2, 118.8, 111.1 (d, *J*<sub>C-F</sub> = 29.5 Hz), 70.8 (d, *J*<sub>C-F</sub> = 14.8 Hz), 39.5, 32.0 (d, *J*<sub>C-F</sub> = 26.8 Hz), 31.2, 25.0, 22.2, 13.9; **<sup>19</sup>F NMR (565 MHz, CDCl<sub>3</sub>)** δ -95.7; **HRMS (ESI) *m/z*:** [M + H]<sup>+</sup> Calculated for C<sub>29</sub>H<sub>27</sub>BrFN<sub>2</sub>O<sub>2</sub><sup>+</sup> 533.1234; Found 533.1229.

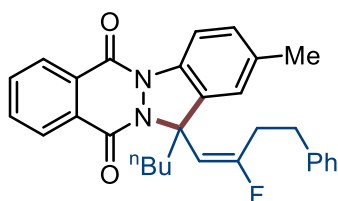

**(E)-13-butyl-13-(2-fluoro-4-phenylbut-1-en-1-yl)-2-methyl-13H-indazolo[1,2-*b*]phthalazine-6,11-dione (3h):** The reaction mixture was subjected directly to flash chromatography (Petroleum/EtOAc: 20:1) on silica gel to provide the product as a light yellow viscous oil (91.4 mg, yield 78%). **<sup>1</sup>H NMR (600 MHz, CDCl<sub>3</sub>)** δ 8.42-8.38 (m, 1H), 8.34 (d, *J* = 8.3 Hz, 1H), 8.32-8.28 (m, 1H), 7.87-7.82 (m, 2H), 7.29 (dd, *J* = 8.3, 0.9 Hz, 1H), 7.02 (s, 1H), 6.99-6.93 (m, 2H), 6.83-6.73 (m, 1H), 6.67 (d, *J* = 7.1 Hz, 2H), 5.96 (d, *J* = 22.3 Hz, 1H), 3.00-2.94 (m, 1H), 2.49-2.43 (m, 1H), 2.42 (s, 3H), 2.31-2.25 (m, 1H), 1.97-1.91 (m, 1H), 1.90-1.83 (m, 1H), 1.81-1.71 (m, 1H), 1.24-1.10 (m, 2H), 0.96-0.87 (m, 1H), 0.74-0.67 (m, 4H); **<sup>13</sup>C NMR (150 MHz, CDCl<sub>3</sub>)** δ 163.2 (d, *J*<sub>C-F</sub> = 255.6 Hz), 154.4, 154.0, 140.0, 137.0, 134.0, 133.5, 133.4, 131.4, 130.4, 129.8, 129.1, 128.3, 128.0, 127.6, 127.5, 126.0, 122.8, 115.7, 111.3 (d, *J*<sub>C-F</sub> = 29.0 Hz), 70.9 (d, *J*<sub>C-F</sub> = 14.8 Hz), 39.6, 31.8 (d, *J*<sub>C-F</sub> = 26.6 Hz), 31.4, 25.1, 22.2, 21.5, 13.9; **<sup>19</sup>F NMR (565 MHz, CDCl<sub>3</sub>)** δ -96.0; **HRMS (ESI) *m/z*:** [M + H]<sup>+</sup> Calculated for C<sub>30</sub>H<sub>30</sub>FN<sub>2</sub>O<sub>2</sub><sup>+</sup> 469.2286; Found 469.2294.

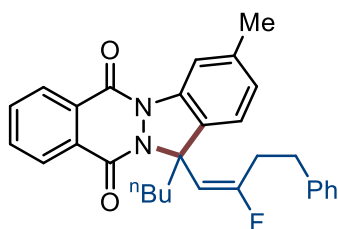

**(E)-13-butyl-13-(2-fluoro-4-phenylbut-1-en-1-yl)-3methyl-13H-indazolo[1,2-*b*]phthalazine-6,11-dione (3i):** The reaction mixture was subjected directly to flash chromatography (Petroleum/EtOAc: 20:1) on silica gel to provide the product as a light yellow viscous oil (83.2 mg, yield 71%). <sup>1</sup>H NMR (600 MHz, CDCl<sub>3</sub>) δ 8.41-8.38 (m, 1H), 8.33-8.27 (m, 2H), 7.87-7.83 (m, 2H), 7.12 (dd, *J* = 7.7, 0.8 Hz, 1H), 7.08 (d, *J* = 7.7 Hz, 1H), 6.99-6.94 (m, 2H), 6.80-6.76 (m, 1H), 6.66 (d, *J* = 7.0 Hz, 2H), 5.98 (d, *J* = 22.4 Hz, 1H), 2.97-2.90 (m, 1H), 2.49 (s, 3H), 2.48-2.44 (m, 1H), 2.31-2.26 (m, 1H), 1.98-1.93 (m, 1H), 1.90-1.72 (m, 2H), 1.23-1.09 (m, 2H), 0.96-0.88 (m, 1H), 0.75-0.71 (m, 1H), 0.70 (t, *J* = 7.3 Hz, 3H); <sup>13</sup>C NMR (150 MHz, CDCl<sub>3</sub>) δ 163.2 (d, *J*<sub>C-F</sub> = 255.6 Hz), 154.7, 154.0, 140.1, 140.0, 136.3, 133.6, 133.4, 129.7, 129.2, 128.4, 128.2, 128.1, 127.7, 127.6, 127.5, 126.0, 122.1, 116.3, 111.4 (d, *J*<sub>C-F</sub> = 28.9 Hz), 70.8 (d, *J*<sub>C-F</sub> = 14.8 Hz), 39.6, 31.8 (d, *J*<sub>C-F</sub> = 26.5 Hz), 31.4, 25.1, 22.2, 21.9, 13.9; <sup>19</sup>F NMR (565 MHz, CDCl<sub>3</sub>) δ -96.1; HRMS (ESI) *m/z*: [M + H]<sup>+</sup> Calculated for C<sub>30</sub>H<sub>30</sub>FN<sub>2</sub>O<sub>2</sub><sup>+</sup> 469.2286; Found 469.2292.

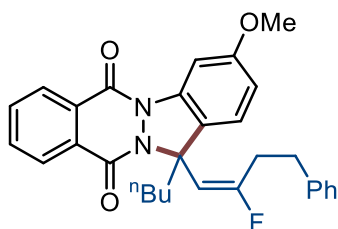

**(E)-13-butyl-13-(2-fluoro-4-phenylbut-1-en-1-yl)-3-methoxy-13H-indazolo[1,2-*b*]phthalazine-6,11-dione (3j):** The reaction mixture was subjected directly to flash chromatography (Petroleum/EtOAc: 16:1) on silica gel to provide the product as a light yellow viscous oil (88.4 mg, yield 73%). <sup>1</sup>H NMR (600 MHz, CDCl<sub>3</sub>) δ 8.40-8.37 (m, 1H), 8.32-8.27 (m, 1H), 8.09 (d, *J* = 2.4 Hz, 1H), 7.87-7.83 (m, 2H), 7.05 (d, *J* = 8.4 Hz, 1H), 6.97-6.94 (m, 2H), 6.85 (dd, *J* = 8.4, 2.4 Hz, 1H), 6.78-6.73 (m, 1H), 6.70 (d, *J* = 7.3 Hz, 2H), 5.97 (d, *J* = 22.6 Hz, 1H), 3.92 (s, 3H), 2.95-2.89 (m, 1H), 2.51-2.45 (m, 1H), 2.32 (ddd, *J* = 13.8, 8.7, 5.6 Hz, 1H), 1.96-1.91 (m, 1H), 1.90-1.73 (m, 2H), 1.23-1.11 (m, 2H), 0.96-0.89 (m, 1H), 0.77-0.72 (m, 1H), 0.70 (t, *J* = 7.4 Hz, 3H); <sup>13</sup>C NMR (150 MHz, CDCl<sub>3</sub>) δ 163.2 (d, *J*<sub>C-F</sub> = 255.4 Hz), 160.8, 154.8, 153.9, 140.0, 137.2, 133.7, 133.4, 129.6, 129.2, 128.2, 128.1, 127.7, 127.5, 126.0, 122.9, 122.8, 114.1, 111.4 (d, *J*<sub>C-F</sub> = 28.5 Hz), 100.8, 70.7 (d, *J*<sub>C-F</sub> = 14.9 Hz), 55.9, 39.6, 31.8 (d, *J*<sub>C-F</sub> = 26.6 Hz), 31.4, 25.1, 22.2, 13.9; <sup>19</sup>F NMR (565 MHz, CDCl<sub>3</sub>) δ -96.0; HRMS (ESI) *m/z*: [M + H]<sup>+</sup> Calculated for C<sub>30</sub>H<sub>30</sub>FN<sub>2</sub>O<sub>3</sub><sup>+</sup> 485.2235; Found 485.2232.

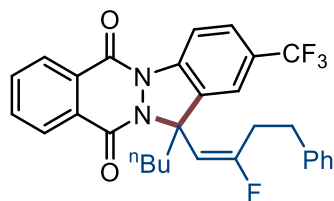

**(E)-13-butyl-13-(2-fluoro-4-phenylbut-1-en-1-yl)-2-(trifluoromethyl)-13H-indazolo[1,2-b]phthalazine-6,11-dione (3l):** The reaction mixture was subjected directly to flash chromatography (Petroleum/EtOAc: 10:1) on silica gel to provide the product as a colorless viscous oil (23.5 mg, yield 18%). **<sup>1</sup>H NMR (600 MHz, CDCl<sub>3</sub>)** δ 8.55 (d, *J* = 8.5 Hz, 1H), 8.42-8.39 (m, 1H), 8.32-8.29 (m, 1H), 7.90-7.87 (m, 2H), 7.77 (d, *J* = 8.5 Hz, 1H), 7.47 (s, 1H), 6.95-6.91 (m, 2H), 6.74-6.71 (m, 1H), 6.66 (d, *J* = 7.9 Hz, 2H), 5.97 (d, *J* = 22.0 Hz, 1H), 3.01-2.95 (m, 1H), 2.54-2.48 (m, 1H), 2.31-2.27 (m, 1H), 1.99-1.87 (m, 2H), 1.77-1.68 (m, 1H), 1.22-1.15 (m, 2H), 0.97-0.90 (m, 1H), 0.73-0.64 (m, 4H); **<sup>13</sup>C NMR (150 MHz, CDCl<sub>3</sub>)** δ 163.5 (d, *J*<sub>C-F</sub> = 256.7 Hz), 155.2, 153.9, 139.7, 138.5, 134.2, 133.7, 132.2, 129.3, 129.2, 128.9 (q, *J*<sub>C-F</sub> = 33.2 Hz), 128.3, 127.9, 127.9, 127.8, 127.4 (q, *J*<sub>C-F</sub> = 3.9 Hz), 126.2, 125.5 (q, *J*<sub>C-F</sub> = 271.3 Hz), 119.7 (q, *J*<sub>C-F</sub> = 3.8 Hz), 115.9, 111.1 (d, *J*<sub>C-F</sub> = 29.7 Hz), 70.8 (d, *J*<sub>C-F</sub> = 14.8 Hz), 39.7, 32.0 (d, *J*<sub>C-F</sub> = 26.9 Hz), 31.2, 25.1, 22.2, 13.9; **<sup>19</sup>F NMR (377 MHz, CDCl<sub>3</sub>)** δ -61.9, -95.0; **HRMS (ESI) m/z:** [M + H]<sup>+</sup> Calculated for C<sub>30</sub>H<sub>27</sub>F<sub>4</sub>N<sub>2</sub>O<sub>2</sub><sup>+</sup> 523.2003; Found 523.2007.

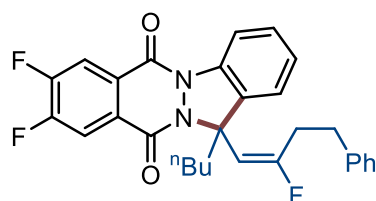

**(E)-13-butyl-8,9-difluoro-13-(2-fluoro-4-phenylbut-1-en-1-yl)-13H-indazolo[1,2-b]phthalazine-6,11-dione (3m):** The reaction mixture was subjected directly to flash chromatography (Petroleum/EtOAc: 20:1) on silica gel to provide the product as a colorless viscous oil (68.7 mg, yield 56%). **<sup>1</sup>H NMR (400 MHz, CDCl<sub>3</sub>)** δ 8.42 (d, *J* = 8.0 Hz, 1H), 8.16 (dd, *J* = 9.7, 7.3 Hz, 1H), 8.04 (dd, *J* = 9.8, 7.4 Hz, 1H), 7.53-7.49 (m, 1H), 7.34 (td, *J* = 7.6, 1.0 Hz, 1H), 7.21-7.18 (m, 1H), 7.00-6.95 (m, 2H), 6.83-6.78 (m, 1H), 6.72-6.67 (m, 2H), 5.96 (d, *J* = 22.3 Hz, 1H), 2.91 (ddd, *J* = 13.8, 12.4, 4.6 Hz, 1H), 2.53-2.46 (m, 1H), 2.32-2.26 (m, 1H), 2.01-1.93 (m, 1H), 1.92-1.81 (m, 1H), 1.74-1.65 (m, 1H), 1.24-1.13 (m, 2H), 0.92-0.86 (m, 1H), 0.78-0.72 (m, 1H), 0.71 (t, *J* = 7.3 Hz, 3H); **<sup>19</sup>F NMR (377 MHz, CDCl<sub>3</sub>)** δ -95.3, -126.5 (d, *J*<sub>C-F</sub> = 21.1 Hz), -127.1 (d, *J*<sub>C-F</sub> = 21.1 Hz); **<sup>13</sup>C NMR (100 MHz, CDCl<sub>3</sub>)** δ 163.4 (d, *J*<sub>C-F</sub> = 256.2 Hz), 152.9, 152.2, 139.9, 135.9, 131.1, 129.9, 128.6 (d, *J*<sub>C-F</sub> = 11.9 Hz), 128.5 (d, *J*<sub>C-F</sub> = 11.9 Hz), 128.3, 128.1, 127.2, 126.0, 122.6, 116.7 (d, *J*<sub>C-F</sub> = 20.5 Hz), 116.6, 116.5 (d, *J*<sub>C-F</sub> = 20.5 Hz), 115.9, 111.1 (d, *J*<sub>C-F</sub> = 29.5 Hz), 71.3 (d, *J*<sub>C-F</sub> = 14.9 Hz), 39.5, 31.8 (d, *J*<sub>C-F</sub> = 26.8 Hz), 31.2, 25.1, 22.2, 13.9; **HRMS (ESI) m/z:** [M + H]<sup>+</sup> Calculated for C<sub>29</sub>H<sub>26</sub>F<sub>3</sub>N<sub>2</sub>O<sub>2</sub><sup>+</sup> 491.1941; Found 491.1944.

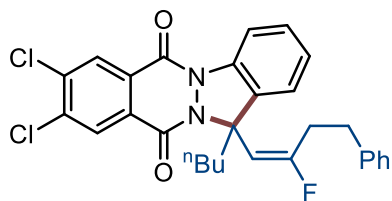

**(E)-13-butyl-8,9-dichloro-13-(2-fluoro-4-phenylbut-1-en-1-yl)-13H-indazolo[1,2-b]phthalazine-6,11-dione (3n):** The reaction mixture was subjected directly to flash chromatography (Petroleum/EtOAc: 20:1) on silica gel to provide the product as a colorless viscous oil (66.7 mg, yield 51%). <sup>1</sup>H NMR (400 MHz, CDCl<sub>3</sub>) δ 8.49-8.41 (m, 2H), 8.33 (s, 1H), 7.50 (td, *J* = 7.9, 1.2 Hz, 1H), 7.34 (td, *J* = 7.6, 1.0 Hz, 1H), 7.21-7.18 (m, 1H), 7.00-6.93 (m, 2H), 6.82-6.75 (m, 1H), 6.72-6.66 (m, 2H), 5.96 (d, *J* = 22.3 Hz, 1H), 2.95-2.86 (m, 1H), 2.56-2.46 (m, 1H), 2.33-2.25 (m, 1H), 2.01-1.93 (m, 1H), 1.93-1.81 (m, 1H), 1.78-1.66 (m, 1H), 1.22-1.08 (m, 2H), 0.90-0.84 (m, 1H), 0.78-0.72 (m, 1H), 0.69 (t, *J* = 7.4 Hz, 3H); <sup>19</sup>F NMR (377 MHz, CDCl<sub>3</sub>) δ -95.4; <sup>13</sup>C NMR (100 MHz, CDCl<sub>3</sub>) δ 163.4 (d, *J*<sub>C-F</sub> = 256.3 Hz), 152.9, 152.2, 139.9, 139.0, 138.8, 135.8, 131.1, 129.9, 129.7, 129.5, 129.0, 128.4, 128.3, 128.1, 127.3, 126.0, 122.6, 116.0, 111.1 (d, *J*<sub>C-F</sub> = 29.5 Hz), 71.3 (d, *J*<sub>C-F</sub> = 14.9 Hz), 39.5, 31.8 (d, *J*<sub>C-F</sub> = 26.8 Hz), 31.2, 25.1, 22.2, 13.9; HRMS (ESI) *m/z*: [M + H]<sup>+</sup> Calculated for C<sub>29</sub>H<sub>26</sub>Cl<sub>2</sub>FN<sub>2</sub>O<sub>2</sub><sup>+</sup> 523.1350; Found 523.1351.

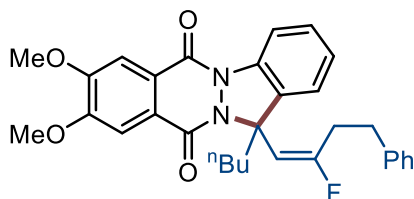

**(E)-13-butyl-13-(2-fluoro-4-phenylbut-1-en-1-yl)-8,9-dimethoxy-13H-indazolo[1,2-b]phthalazine-6,11-dione (3o):** The reaction mixture was subjected directly to flash chromatography (Petroleum/EtOAc: 6:1) on silica gel to provide the product as a colorless viscous oil (57.9 mg, yield 45%). <sup>1</sup>H NMR (400 MHz, CDCl<sub>3</sub>) δ 8.44 (d, *J* = 8.1 Hz, 1H), 7.76 (s, 1H), 7.69 (s, 1H), 7.52-7.44 (m, 1H), 7.33-7.27 (m, 1H), 7.19 (d, *J* = 7.6 Hz, 1H), 7.05-6.98 (m, 2H), 6.93-6.86 (m, 1H), 6.67 (d, *J* = 7.4 Hz, 2H), 5.97 (d, *J* = 22.2 Hz, 1H), 4.07 (s, 3H), 4.05 (s, 3H), 2.97 (td, *J* = 13.2, 4.6 Hz, 1H), 2.49-2.39 (m, 1H), 2.32-2.23 (m, 1H), 2.04-1.92 (m, 1H), 1.89-1.81 (m, 1H), 1.81-1.71 (m, 1H), 1.22-1.09 (m, 2H), 0.99-0.90 (m, 1H), 0.87 (d, *J* = 7.0 Hz, 1H), 0.71 (t, *J* = 7.3 Hz, 3H); <sup>13</sup>C NMR (100 MHz, CDCl<sub>3</sub>) δ 163.4 (d, *J*<sub>C-F</sub> = 254.0 Hz), 154.6, 154.03, 153.96, 153.8, 140.1, 136.4, 131.3, 129.7, 128.3, 128.1, 126.7, 126.1, 124.0, 123.7, 122.5, 115.8, 111.1 (d, *J*<sub>C-F</sub> = 28.0 Hz), 108.1, 107.9, 70.9 (d, *J*<sub>C-F</sub> = 14.0 Hz), 56.8, 56.7, 39.7, 31.5, 31.8 (d, *J*<sub>C-F</sub> = 26.8 Hz), 25.1, 22.3, 14.0; <sup>19</sup>F NMR (376 MHz, CDCl<sub>3</sub>) δ -95.9; HRMS (ESI) *m/z*: [M + H]<sup>+</sup> Calculated for C<sub>31</sub>H<sub>32</sub>FN<sub>2</sub>O<sub>4</sub><sup>+</sup> 515.2341; Found 515.2347.

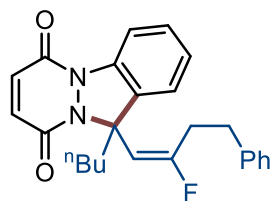

**(E)-11-butyl-11-(2-fluoro-4-phenylbut-1-en-1-yl)-11H-pyridazino[1,2-a]indazole-6,9-dione**

**(3p):** The reaction mixture was subjected directly to flash chromatography (Petroleum/EtOAc: 8:1) on silica gel to provide the product as a yellow solid (45.5 mg, yield 45%), m. p. 89-91°C. **<sup>1</sup>H NMR (600 MHz, CDCl<sub>3</sub>)** δ 8.35 (d, *J* = 8.2 Hz, 1H), 7.49-7.45 (m, 1H), 7.34-7.30 (m, 1H), 7.18-7.13 (m, 3H), 7.13-7.09 (m, 1H), 6.90 (d, *J* = 10.2 Hz, 1H), 6.79 (d, *J* = 10.2 Hz, 1H), 6.75 (d, *J* = 7.1 Hz, 2H), 5.88 (d, *J* = 22.0 Hz, 1H), 2.92-2.84 (m, 1H), 2.53-2.47 (m, 1H), 2.31-2.26 (m, 1H), 1.95-1.89 (m, 1H), 1.83-1.76 (m, 2H), 1.24-1.10 (m, 2H), 0.92-0.83 (m, 1H), 0.73 (t, *J* = 7.3 Hz, 3H), 0.68-0.61 (m, 1H); **<sup>13</sup>C NMR (150 MHz, CDCl<sub>3</sub>)** δ 163.4 (d, *J*<sub>C-F</sub> = 256.7 Hz), 153.8, 153.3, 140.0, 135.7, 135.2, 131.0, 129.8, 128.6, 128.3, 127.4, 126.4, 122.4, 115.6, 110.2 (d, *J*<sub>C-F</sub> = 29.6 Hz), 71.4 (d, *J*<sub>C-F</sub> = 14.8 Hz), 39.0, 31.7 (d, *J*<sub>C-F</sub> = 26.7 Hz), 31.4, 25.0, 22.2, 13.9; **<sup>19</sup>F NMR (377 MHz, CDCl<sub>3</sub>)** δ -95.0; **HRMS (ESI) m/z:** [M + H]<sup>+</sup> Calculated for C<sub>25</sub>H<sub>26</sub>FN<sub>2</sub>O<sub>2</sub><sup>+</sup> 405.1973; Found 405.1977.

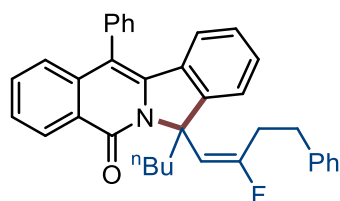

**(E)-7-butyl-7-(2-fluoro-4-phenylbut-1-en-1-yl)-12-phenylisoindolo[2,1-b]isoquinolin-5(7H)-one (3q):**

The reaction mixture was subjected directly to flash chromatography (Petroleum/EtOAc: 20:1) on silica gel to provide the product as a colorless viscous oil (28.3 mg, yield 22%). **<sup>1</sup>H NMR (600 MHz, CDCl<sub>3</sub>)** δ 8.52 (d, *J* = 8.0 Hz, 1H), 7.63-7.51 (m, 5H), 7.50-7.48 (m, 1H), 7.43-7.41 (m, 1H), 7.37-7.34 (m, 1H), 7.31 (d, *J* = 7.6 Hz, 1H), 7.16 (d, *J* = 8.0 Hz, 1H), 7.10-7.07 (m, 1H), 7.05-7.00 (m, 4H), 6.56 (d, *J* = 7.0 Hz, 2H), 6.31 (d, *J* = 8.0 Hz, 1H), 6.08 (d, *J* = 21.8 Hz, 1H), 3.27-3.21 (m, 1H), 2.32-2.27 (m, 1H), 2.13-2.07 (m, 2H), 1.76-1.61 (m, 2H), 1.24-1.09 (m, 2H), 0.88-0.78 (m, 1H), 0.70 (t, *J* = 7.3 Hz, 3H), 0.57-0.49 (m, 1H); **<sup>13</sup>C NMR (150 MHz, CDCl<sub>3</sub>)** δ 161.7 (d, *J*<sub>C-F</sub> = 254.2 Hz), 160.0, 146.7, 140.6, 138.6, 138.1, 135.2, 133.2, 132.2, 131.3, 131.1, 130.1, 129.6, 129.6, 128.6, 128.2, 128.1, 127.8, 126.6, 126.0, 125.2, 123.8, 122.6, 114.4, 110.7 (d, *J*<sub>C-F</sub> = 27.6 Hz), 70.7 (d, *J*<sub>C-F</sub> = 13.7 Hz), 38.7, 31.7, 31.7 (d, *J*<sub>C-F</sub> = 27.2 Hz), 24.6, 22.3, 14.0; **<sup>19</sup>F NMR (377 MHz, CDCl<sub>3</sub>)** δ -97.8; **HRMS (ESI) m/z:** [M + H]<sup>+</sup> Calculated for C<sub>36</sub>H<sub>33</sub>FN<sub>2</sub>O<sup>+</sup> 514.2541; Found 514.2546.

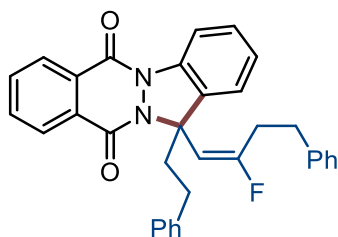

**(E)-13-(2-fluoro-4-phenylbut-1-en-1-yl)-13-phenethyl-13H-indazolo[1,2-b]phthalazine-6,11-dione (3r):** The reaction mixture was subjected directly to flash chromatography (Petroleum/EtOAc: 12:1) on silica gel to provide the product as a light yellow viscous oil (75.4 mg, yield 60%). **<sup>1</sup>H NMR (600 MHz, CDCl<sub>3</sub>)** δ 8.51 (d, *J* = 8.1 Hz, 1H), 8.34-8.29 (m, 1H), 8.22-8.15 (m, 1H), 7.83-7.77 (m, 2H), 7.57-7.52 (m, 1H), 7.38-7.34 (m, 1H), 7.25 (d, *J* = 7.9 Hz, 1H), 7.01-6.97 (m, 2H), 6.97-6.94 (m, 2H), 6.88 (d, *J* = 6.8 Hz, 2H), 6.83-6.79 (m, 1H), 6.79-6.75 (m, 1H), 6.67 (d, *J* = 7.1 Hz, 2H), 6.02 (d, *J* = 22.4 Hz, 1H), 3.55-3.48 (m, 1H), 2.50-2.44 (m, 1H), 2.32-2.23 (m, 3H), 2.18-2.12 (m, 1H), 1.93-1.84 (m, 1H), 1.81-1.71 (m, 1H); **<sup>13</sup>C NMR (150 MHz, CDCl<sub>3</sub>)** δ 163.2 (d, *J*<sub>C-F</sub> = 255.9 Hz), 154.8, 154.0, 139.9, 139.6, 136.4, 133.4, 133.2, 130.6, 130.0, 129.7, 129.0, 128.3, 128.2, 128.14, 128.07, 127.5, 127.3, 126.9, 126.0, 125.8, 122.6, 116.0, 111.4 (d, *J*<sub>C-F</sub> = 29.3 Hz), 70.6 (d, *J*<sub>C-F</sub> = 14.9 Hz), 40.0, 31.8 (d, *J*<sub>C-F</sub> = 26.6 Hz), 31.3, 29.8; **<sup>19</sup>F NMR (565 MHz, CDCl<sub>3</sub>)** δ -95.7; **HRMS (ESI) m/z:** [M + Na]<sup>+</sup> Calculated for C<sub>33</sub>H<sub>27</sub>FN<sub>2</sub>O<sub>2</sub>Na<sup>+</sup> 525.1949; Found 525.1954.

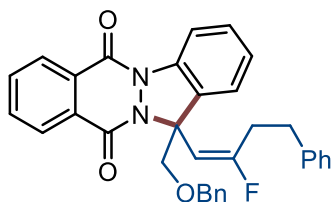

**(E)-13-((benzyloxy)methyl)-13-(2-fluoro-4-phenylbut-1-en-1-yl)-13H-indazolo[1,2-b]phthalazine-6,11-dione (3s):** The reaction mixture was subjected directly to flash chromatography (Petroleum/EtOAc: 8:1) on silica gel to provide the product as a yellow viscous oil (38.9 mg, yield 30%). **<sup>1</sup>H NMR (600 MHz, CDCl<sub>3</sub>)** δ 8.49 (d, *J* = 8.2 Hz, 1H), 8.40 (dd, *J* = 7.3, 1.8 Hz, 1H), 8.25 (dd, *J* = 7.3, 1.8 Hz, 1H), 7.87-7.82 (m, 2H), 7.54-7.51 (m, 1H), 7.31-7.29 (m, 1H), 7.21 (d, *J* = 7.6 Hz, 1H), 7.15-7.11 (m, 3H), 6.97-6.94 (m, 2H), 6.92-6.89 (m, 2H), 6.79-6.76 (m, 1H), 6.66 (d, *J* = 7.5 Hz, 2H), 5.81 (d, *J* = 21.5 Hz, 1H), 4.52 (d, *J* = 9.4 Hz, 1H), 4.38-4.31 (m, 2H), 3.85 (d, *J* = 9.4 Hz, 1H), 2.50-2.45 (m, 1H), 2.32-2.27 (m, 1H), 1.96-1.87 (m, 1H), 1.85-1.76 (m, 1H); **<sup>13</sup>C NMR (150 MHz, CDCl<sub>3</sub>)** δ 164.4 (d, *J*<sub>C-F</sub> = 257.3 Hz), 154.7, 154.4, 139.9, 137.5, 136.6, 133.5, 133.4, 130.0, 129.9, 129.9, 129.2, 128.3, 128.3, 128.1, 127.7, 127.6, 127.6, 127.4, 126.6, 126.1, 122.8, 115.8, 106.8 (d, *J*<sub>C-F</sub> = 30.0 Hz), 73.3, 72.2, 70.4 (d, *J*<sub>C-F</sub> = 14.8 Hz), 32.1 (d, *J*<sub>C-F</sub> = 26.4 Hz), 31.3; **<sup>19</sup>F NMR (565 MHz, CDCl<sub>3</sub>)** δ -94.2; **HRMS (ESI) m/z:** [M + H]<sup>+</sup> Calculated for C<sub>33</sub>H<sub>28</sub>FN<sub>2</sub>O<sub>3</sub><sup>+</sup> 519.2078; Found 519.2083.

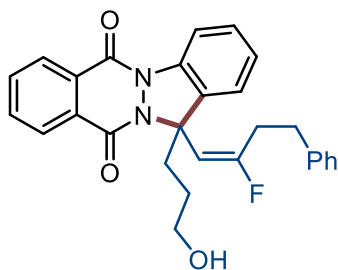

**(E)-13-(2-fluoro-4-phenylbut-1-en-1-yl)-13-(3-hydroxypropyl)-13H-indazolo[1,2-*b*]phthalazine-6,11-dione (3t):** The reaction mixture was subjected directly to flash chromatography (Petroleum/EtOAc: 2:1) on silica gel to provide the product as a yellow viscous oil (51.5 mg, yield 45%). **<sup>1</sup>H NMR (600 MHz, CDCl<sub>3</sub>)** δ 8.44 (d, *J* = 8.1 Hz, 1H), 8.39-8.36 (m, 1H), 8.28-8.23 (m, 1H), 7.87-7.81 (m, 2H), 7.50-7.46 (m, 1H), 7.32-7.29 (m, 1H), 7.20 (d, *J* = 7.6 Hz, 1H), 6.96-6.91 (m, 2H), 6.76-6.72 (m, 1H), 6.65 (d, *J* = 7.5 Hz, 2H), 5.98 (d, *J* = 22.3 Hz, 1H), 3.49-3.40 (m, 2H), 3.05-2.98 (m, 1H), 2.48-2.42 (m, 1H), 2.30-2.25 (m, 1H), 2.11-2.06 (m, 1H), 1.91-1.83 (m, 1H), 1.77-1.68 (m, 1H), 1.23-1.16 (m, 1H), 1.07-0.99 (m, 1H); **<sup>13</sup>C NMR (150 MHz, CDCl<sub>3</sub>)** δ 163.4 (d, *J*<sub>C-F</sub> = 255.9 Hz), 154.6, 154.1, 139.8, 136.1, 133.7, 133.5, 130.7, 129.9, 129.6, 129.0, 128.2, 128.0, 127.6, 127.6, 127.0, 126.0, 122.5, 115.9, 111.1 (d, *J*<sub>C-F</sub> = 29.5 Hz), 70.7 (d, *J*<sub>C-F</sub> = 15.1 Hz), 61.8, 36.2, 31.8 (d, *J*<sub>C-F</sub> = 26.7 Hz), 31.3, 26.3; **<sup>19</sup>F NMR (377 MHz, CDCl<sub>3</sub>)** δ -95.4; **HRMS (ESI) *m/z*:** [M + H]<sup>+</sup> Calculated for C<sub>28</sub>H<sub>26</sub>FN<sub>2</sub>O<sub>3</sub><sup>+</sup> 457.1922; Found 457.1927.

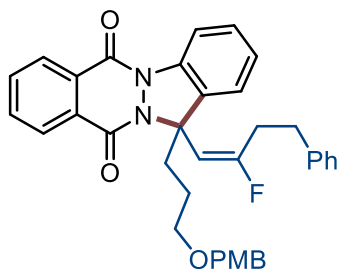

**(E)-13-(2-fluoro-4-phenylbut-1-en-1-yl)-13-((4-methoxybenzyl)oxy)propyl)-13H-indazolo[1,2-*b*]phthalazine-6,11-dione (3u):** The reaction mixture was subjected directly to flash chromatography (Petroleum/EtOAc: 4:1) on silica gel to provide the product as a yellow viscous oil (119.7 mg, yield 83%). **<sup>1</sup>H NMR (600 MHz, CDCl<sub>3</sub>)** δ 8.46 (d, *J* = 8.2 Hz, 1H), 8.41-8.39 (m, 1H), 8.31-8.27 (m, 1H), 7.87-7.82 (m, 2H), 7.51-7.47 (m, 1H), 7.32-7.29 (m, 1H), 7.20 (d, *J* = 7.4 Hz, 1H), 7.13 (d, *J* = 8.6 Hz, 2H), 6.98-6.93 (m, 2H), 6.83-6.81 (m, 2H), 6.79-6.74 (m, 1H), 6.67 (d, *J* = 7.1 Hz, 2H), 6.00 (d, *J* = 22.3 Hz, 1H), 4.25 (s, 2H), 3.77 (s, 3H), 3.30-3.24 (m, 2H), 3.05-2.99 (m, 1H), 2.49-2.44 (m, 1H), 2.31-2.26 (m, 1H), 2.13-2.07 (m, 1H), 1.93-1.84 (m, 1H), 1.80-1.70 (m, 1H), 1.30-1.22 (m, 1H), 1.14-1.06 (m, 1H); **<sup>13</sup>C NMR (150 MHz, CDCl<sub>3</sub>)** δ 163.3 (d, *J*<sub>C-F</sub> = 255.9 Hz), 159.2, 154.6, 154.0, 139.9, 136.1, 133.6, 133.4, 130.8, 130.3, 129.8, 129.7, 129.3, 129.1, 128.3, 128.0, 127.6, 127.6, 126.9, 126.0, 122.6, 115.9, 113.8, 111.2 (d, *J*<sub>C-F</sub> = 29.3 Hz), 72.6, 70.7 (d, *J*<sub>C-F</sub> = 14.9 Hz), 69.1, 55.3, 36.4, 31.8 (d, *J*<sub>C-F</sub> = 26.9 Hz), 31.3, 23.5; **<sup>19</sup>F NMR (565 MHz, CDCl<sub>3</sub>)** δ -95.6; **HRMS (ESI) *m/z*:** [M + H]<sup>+</sup> Calculated for C<sub>36</sub>H<sub>24</sub>FN<sub>2</sub>O<sub>4</sub><sup>+</sup> 577.2497; Found 577.2499.

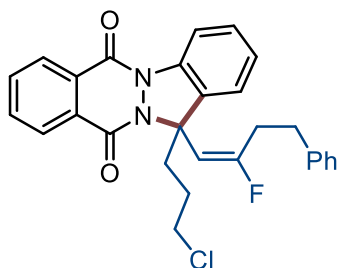

**(E)-13-(3-chloropropyl)-13-(2-fluoro-4-phenylbut-1-en-1-yl)-13H-indazolo[1,2-*b*]phthalazine-6,11-dione (3v):** The reaction mixture was subjected directly to flash chromatography (Petroleum/EtOAc: 8:1) on silica gel to provide the product as a light yellow viscous oil (86.9 mg, yield 73%). **<sup>1</sup>H NMR (600 MHz, CDCl<sub>3</sub>)** δ 8.46 (d, *J* = 8.2 Hz, 1H), 8.42-8.38 (m, 1H), 8.33-8.25 (m, 1H), 7.88-7.84 (m, 2H), 7.54-7.48 (m, 1H), 7.35-7.31 (m, 1H), 7.22 (d, *J* = 7.6 Hz, 1H), 7.00-6.90 (m, 2H), 6.77-6.73 (m, 1H), 6.67 (d, *J* = 7.3 Hz, 2H), 6.00 (d, *J* = 22.4 Hz, 1H), 3.39-3.30 (m, 2H), 3.14-3.05 (m, 1H), 2.49-2.44 (m, 1H), 2.32-2.26 (m, 1H), 2.24-2.17 (m, 1H), 1.93-1.84 (m, 1H), 1.79-1.69 (m, 1H), 1.52-1.43 (m, 1H), 1.24-1.16 (m, 1H); **<sup>13</sup>C NMR (150 MHz, CDCl<sub>3</sub>)** δ 163.5 (d, *J*<sub>C-F</sub> = 256.0 Hz), 154.7, 154.1, 139.8, 136.0, 133.8, 133.6, 130.3, 130.1, 129.7, 129.0, 128.3, 128.0, 127.7, 127.6, 127.0, 126.0, 122.6, 116.0, 111.0 (d, *J*<sub>C-F</sub> = 29.8 Hz), 70.4 (d, *J*<sub>C-F</sub> = 14.9 Hz), 44.0, 37.1, 31.8 (d, *J*<sub>C-F</sub> = 27.0 Hz), 31.3, 26.4; **<sup>19</sup>F NMR (565 MHz, CDCl<sub>3</sub>)** δ -95.0; **HRMS (ESI) m/z: [M + H]<sup>+</sup>** Calculated for C<sub>28</sub>H<sub>25</sub>ClFN<sub>2</sub>O<sub>2</sub><sup>+</sup> 475.1583; Found 475.1586.

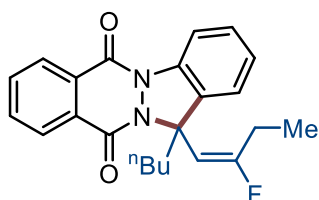

**(E)-13-butyl-13-(2-fluorobut-1-en-1-yl)-13H-indazolo[1,2-*b*]phthalazine-6,11-dione (3w):** The reaction mixture was subjected directly to flash chromatography (Petroleum/EtOAc: 12:1) on silica gel to provide the product as a light yellow viscous oil (58.7 mg, yield 62%). **<sup>1</sup>H NMR (600 MHz, CDCl<sub>3</sub>)** δ 8.47-8.41 (m, 2H), 8.38-8.35 (m, 1H), 7.88-7.84 (m, 2H), 7.48-7.45 (m, 1H), 7.34-7.30 (m, 1H), 7.27-7.25 (m, 1H), 5.87 (d, *J* = 21.5 Hz, 1H), 3.03-2.97 (m, 1H), 2.02-1.97 (m, 1H), 1.65-1.45 (m, 2H), 1.25-1.12 (m, 2H), 1.02-0.93 (m, 1H), 0.77-0.72 (m, 1H), 0.70 (t, *J* = 7.4 Hz, 3H), 0.57 (t, *J* = 7.5 Hz, 3H); **<sup>13</sup>C NMR (150 MHz, CDCl<sub>3</sub>)** δ 165.5 (d, *J*<sub>C-F</sub> = 257.0 Hz), 154.9, 154.1, 136.0, 133.8, 133.5, 131.6, 129.6, 129.6, 129.2, 127.7, 127.6, 126.8, 122.4, 115.8, 109.8 (d, *J*<sub>C-F</sub> = 29.3 Hz), 71.1 (d, *J*<sub>C-F</sub> = 14.5 Hz), 39.7, 25.1, 22.7 (d, *J*<sub>C-F</sub> = 27.6 Hz), 22.2, 13.9, 9.6; **<sup>19</sup>F NMR (565 MHz, CDCl<sub>3</sub>)** δ -97.0; **HRMS (ESI) m/z: [M + H]<sup>+</sup>** Calculated for C<sub>23</sub>H<sub>24</sub>FN<sub>2</sub>O<sub>2</sub><sup>+</sup> 379.1816; Found 379.1819.



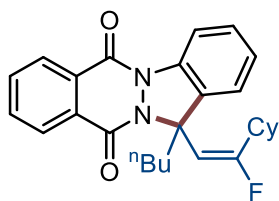

**(E)-13-butyl-13-(2-cyclohexyl-2-fluorovinyl)-13H-indazolo[1,2-b]phthalazine-6,11-dione (3x):**

The reaction mixture was subjected directly to flash chromatography (Petroleum/EtOAc: 32:1) on silica gel to provide the product as a light yellow viscous oil (82.2 mg, yield 76%). **<sup>1</sup>H NMR (600 MHz, CDCl<sub>3</sub>)** δ 8.46 (d, *J* = 8.1 Hz, 1H), 8.45-8.42 (m, 1H), 8.38-8.34 (m, 1H), 7.88-7.84 (m, 2H), 7.49-7.45 (m, 1H), 7.33-7.30 (m, 1H), 7.26-7.25 (m, 1H), 5.77 (d, *J* = 21.4 Hz, 1H), 3.04-2.99 (m, 1H), 2.03-1.98 (m, 1H), 1.42-1.31 (m, 4H), 1.22-0.98 (m, 6H), 0.90-0.84 (m, 2H), 0.80-0.74 (m, 1H), 0.71 (t, *J* = 7.4 Hz, 3H), 0.58-0.44 (m, 2H); **<sup>13</sup>C NMR (150 MHz, CDCl<sub>3</sub>)** δ 167.8 (d, *J*<sub>C-F</sub> = 260.8 Hz), 154.8, 154.1, 136.1, 133.9, 133.5, 132.0, 129.6, 129.4, 129.2, 127.6, 127.6, 126.7, 122.4, 115.7, 109.0 (d, *J*<sub>C-F</sub> = 29.2 Hz), 71.2 (d, *J*<sub>C-F</sub> = 14.6 Hz), 39.6, 39.0 (d, *J*<sub>C-F</sub> = 25.3 Hz), 28.61, 27.8, 25.8 (d, *J*<sub>C-F</sub> = 26.6 Hz), 25.3 (d, *J*<sub>C-F</sub> = 23.3 Hz), 22.3, 14.0; **<sup>19</sup>F NMR (565 MHz, CDCl<sub>3</sub>)** δ -107.2; **HRMS (ESI) m/z:** [M + H]<sup>+</sup> Calculated for C<sub>27</sub>H<sub>30</sub>FN<sub>2</sub>O<sub>2</sub><sup>+</sup> 433.2286; Found 433.2293.

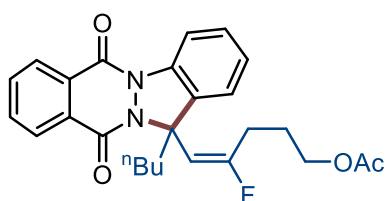

**(E)-5-(13-butyl-6,11-dioxo-6,11-dihydro-13H-indazolo[1,2-b]phthalazin-13-yl)-4-fluoropent-4-en-1-yl acetate (3y):** The reaction mixture was subjected directly to flash chromatography (Petroleum/EtOAc: 10:1) on silica gel to provide the product as a light yellow viscous oil (63.1 mg, yield 56%). **<sup>1</sup>H NMR (600 MHz, CDCl<sub>3</sub>)** δ 8.46 (d, *J* = 8.1 Hz, 1H), 8.44-8.41 (m, 1H), 8.38-8.33 (m, 1H), 7.88-7.85 (m, 2H), 7.49-7.46 (m, 1H), 7.35-7.32 (m, 1H), 7.26 (d, *J* = 8.0 Hz, 1H), 5.95 (d, *J* = 21.7 Hz, 1H), 3.62-3.55 (m, 2H), 3.02-2.97 (m, 1H), 2.02-1.97 (m, 1H), 1.88 (s, 3H), 1.74-1.65 (m, 1H), 1.64-1.54 (m, 1H), 1.47-1.39 (m, 1H), 1.34-1.26 (m, 1H), 1.25-1.12 (m, 2H), 1.01-0.93 (m, 1H), 0.77-0.72 (m, 1H), 0.70 (t, *J* = 7.3 Hz, 3H); **<sup>13</sup>C NMR (150 MHz, CDCl<sub>3</sub>)** δ 170.9, 163.4 (d, *J* = 256.1 Hz), 154.8, 154.1, 136.1, 133.9, 133.6, 131.4, 129.8, 129.6, 129.1, 127.7, 127.6, 126.9, 122.4, 115.8, 111.2 (d, *J* = 28.9 Hz), 70.9 (d, *J* = 14.4 Hz), 63.3, 39.7, 26.2 (d, *J* = 27.3 Hz), 25.1, 24.5, 22.2, 20.9, 13.9; **<sup>19</sup>F NMR (565 MHz, CDCl<sub>3</sub>)** δ -95.9; **HRMS (ESI) m/z:** [M + H]<sup>+</sup> Calculated for C<sub>26</sub>H<sub>28</sub>FN<sub>2</sub>O<sub>4</sub><sup>+</sup> 451.2028; Found 451.2035.

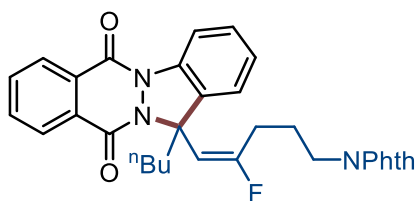

**(E)-13-butyl-13-(5-(1,3-dioxoisindolin-2-yl)-2-fluoropent-1-en-1-yl)-13*H*-indazolo[1,2-*b*]phthalazine-6,11-dione (3z):** The reaction mixture was subjected directly to flash chromatography (100% DCM) on silica gel to provide the product as a yellow viscous oil (63.1 mg, yield 47%). <sup>1</sup>H NMR (600 MHz, CDCl<sub>3</sub>) δ 8.43-8.40 (m, 1H), 8.36-8.33 (m, 1H), 8.07 (d, *J* = 8.1 Hz, 1H), 7.88-7.84 (m, 2H), 7.81-7.78 (m, 2H), 7.76-7.72 (m, 2H), 7.27-7.24 (m, 1H), 7.23-7.20 (m, 1H), 7.17-7.14 (m, 1H), 5.94 (d, *J* = 21.8 Hz, 1H), 3.37-3.25 (m, 1H), 3.25-3.17 (m, 1H), 2.98-2.90 (m, 1H), 2.00-1.95 (m, 1H), 1.74-1.66 (m, 1H), 1.58-1.47 (m, 2H), 1.33-1.26 (m, 1H), 1.22-1.09 (m, 2H), 0.99-0.90 (m, 1H), 0.75-0.70 (m, 1H), 0.68 (t, *J* = 7.4 Hz, 3H); <sup>13</sup>C NMR (150 MHz, CDCl<sub>3</sub>) δ 168.1, 163.3 (d, *J*<sub>C-F</sub> = 256.4 Hz), 154.7, 154.2, 135.9, 134.0, 133.8, 133.5, 132.1, 131.0, 129.6, 129.1, 127.7, 127.7, 126.7, 123.5, 122.4, 115.5, 111.0 (d, *J*<sub>C-F</sub> = 28.8 Hz), 70.9 (d, *J*<sub>C-F</sub> = 14.4 Hz), 39.6, 37.3, 27.2 (d, *J*<sub>C-F</sub> = 27.2 Hz), 25.0, 24.7, 22.2, 13.9; <sup>19</sup>F NMR (565 MHz, CDCl<sub>3</sub>) δ -95.3; HRMS (ESI) *m/z*: [M + H]<sup>+</sup> Calculated for C<sub>32</sub>H<sub>29</sub>FN<sub>3</sub>O<sub>4</sub><sup>+</sup> 538.2137; Found 538.2145.

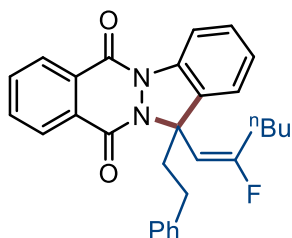

**(E)-13-(2-fluorohex-1-en-1-yl)-13-phenethyl-13*H*-indazolo[1,2-*b*]phthalazine-6,11-dione (3aa):** The reaction mixture was subjected directly to flash chromatography (Petroleum/EtOAc: 16:1) on silica gel to provide the product as a light yellow viscous oil (52.3 mg, yield 46%). <sup>1</sup>H NMR (600 MHz, CDCl<sub>3</sub>) δ 8.50 (d, *J* = 8.2 Hz, 1H), 8.35 (dd, *J* = 7.2, 2.0 Hz, 1H), 8.28-8.21 (m, 1H), 7.83-7.79 (m, 2H), 7.54-7.50 (m, 1H), 7.39-7.36 (m, 1H), 7.31 (d, *J* = 7.3 Hz, 1H), 7.02-6.98 (m, 2H), 6.90 (d, *J* = 7.4 Hz, 2H), 6.85-6.79 (m, 1H), 5.91 (d, *J* = 21.7 Hz, 1H), 3.58-3.51 (m, 1H), 2.34-2.26 (m, 2H), 2.23-2.18 (m, 1H), 1.56-1.48 (m, 2H), 1.11-1.03 (m, 1H), 0.98-0.90 (m, 1H), 0.85-0.70 (m, 2H), 0.46 (t, *J* = 7.3 Hz, 3H); <sup>13</sup>C NMR (150 MHz, CDCl<sub>3</sub>) δ 164.9 (d, *J*<sub>C-F</sub> = 257.0 Hz), 154.9, 154.1, 139.7, 136.3, 133.5, 133.3, 131.0, 130.0, 129.5, 129.0, 128.2, 127.5, 127.4, 126.9, 125.8, 122.6, 116.0, 110.3 (d, *J*<sub>C-F</sub> = 29.7 Hz), 70.7 (d, *J*<sub>C-F</sub> = 14.8 Hz), 40.2, 29.9, 29.0 (d, *J*<sub>C-F</sub> = 26.8 Hz), 27.3, 22.2, 13.5; <sup>19</sup>F NMR (565 MHz, CDCl<sub>3</sub>) δ -94.7; HRMS (ESI) *m/z*: [M + H]<sup>+</sup> Calculated for C<sub>29</sub>H<sub>28</sub>FN<sub>2</sub>O<sub>2</sub><sup>+</sup> 455.2129; Found 455.2134.

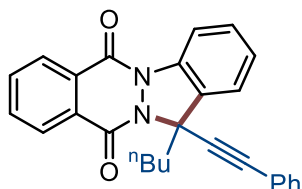

**13-butyl-13-(phenylethynyl)-13*H*-indazolo[1,2-*b*]phthalazine-6,11-dione (3ab'):** The reaction mixture was subjected directly to flash chromatography (Petroleum/EtOAc: 20:1) on silica gel to provide the product as a yellow viscous oil (36.6 mg, yield 36%). <sup>1</sup>H NMR (600 MHz, CDCl<sub>3</sub>) δ 8.46 (d, *J* = 8.0 Hz, 1H), 8.45-8.39 (m, 2H), 7.88-7.84 (m, 2H), 7.53-7.48 (m, 2H), 7.45-7.42 (m,

2H), 7.38-7.35 (m, 1H), 7.29-7.25 (m, 3H), 3.26-3.18 (m, 1H), 2.41-2.32 (m, 1H), 1.32-1.20 (m, 2H), 1.19-1.11 (m, 1H), 0.99-0.91 (m, 1H), 0.78 (t,  $J = 7.3$  Hz, 3H);  $^{13}\text{C}$  NMR (150 MHz,  $\text{CDCl}_3$ )  $\delta$  154.8, 154.7, 135.8, 133.7, 133.6, 132.2, 130.0, 129.8, 129.7, 129.3, 128.9, 128.3, 127.8, 127.6, 126.7, 122.6, 122.1, 116.1, 86.2, 85.6, 67.4, 38.9, 25.5, 22.2, 14.0; HRMS (ESI)  $m/z$ :  $[\text{M} + \text{H}]^+$  Calculated for  $\text{C}_{27}\text{H}_{23}\text{N}_2\text{O}_2^+$  407.1754; Found 407.1757.

### Gram Scale Synthesis of Compound 3a

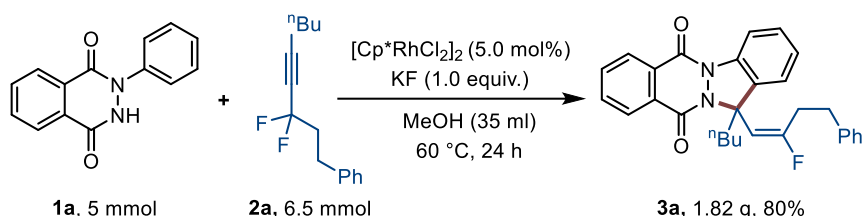

To a mixture of *N*-phenyl 2,3-dihydrophthalazine-1,4-dione **1a** (5 mmol),  $[\text{Cp}^*\text{RhCl}_2]_2$  (5 mol%) and KF (5 mmol) in a 100 mL flask was added a solution of **2a** (6.5 mmol) in MeOH (40.0 mL). Then the flask was capped with septa, and the resulting mixture was stirred at 60 °C in an oil bath for 24 h. After removal of the solvent, the residue was purified by flash chromatography on silica gel to provide the desired products **3a** as a yellow oil (1.82 g, yield 80%).

### Deuterium Incorporation Experiments of Rh(III)-Catalyzed [4+1] Annulation

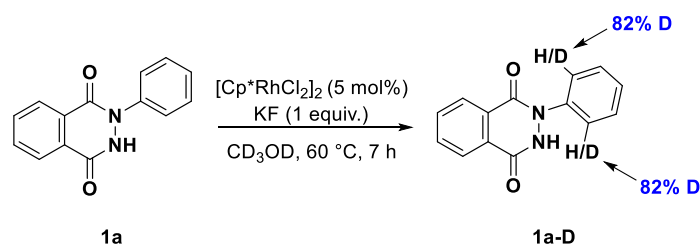

To a mixture of **1a** (0.25 mmol),  $[\text{Cp}^*\text{RhCl}_2]_2$  (5 mol%) and KF (0.25 mmol) in a 25 mL Schlenk tube was added  $\text{CD}_3\text{OD}$  (4.0 mL). Then the tube was capped with septa, and the resulting mixture was stirred at 60 °C in an oil bath for 7 h. After removal of the solvent, the residue was purified by flash chromatography (Petroleum/EtOAc = 2:1) on silica gel to give the product. Found *H/D* exchange occurred on the phenyl ring at the ortho-position (82% D).

$^1\text{H}$  NMR of the product **1a-D** of this reaction.

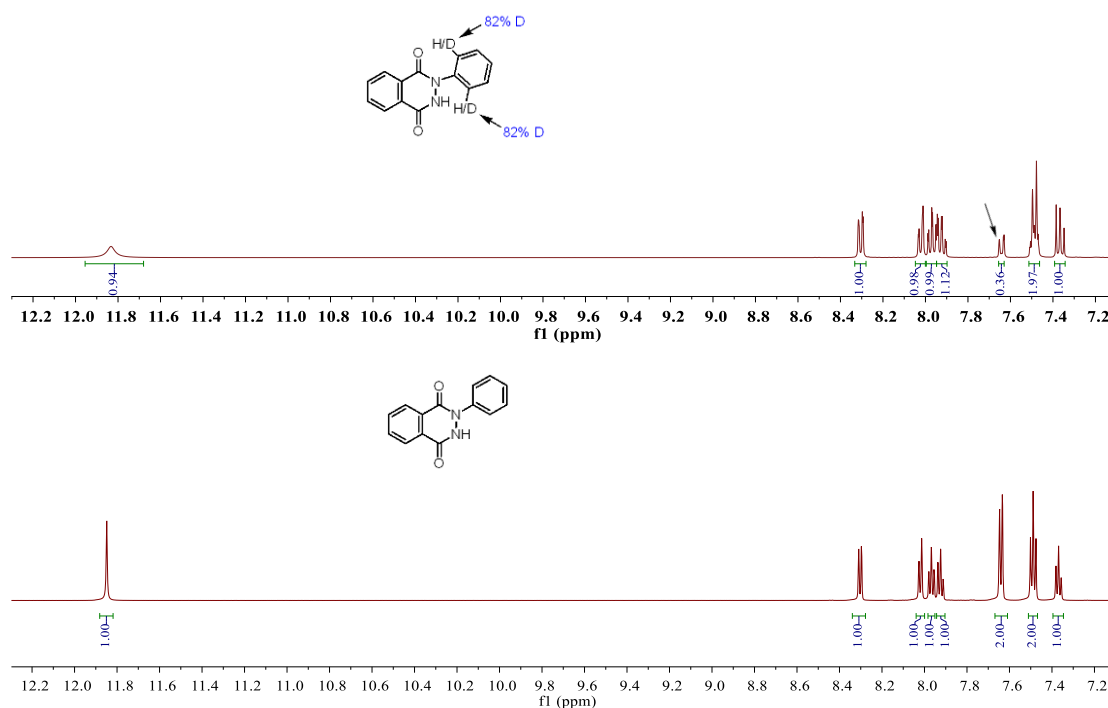

## Determination of the KIE

### (1) The intermolecular competition experiment

To a mixture of **1a** (0.25 mmol), **1a-D** (0.25 mmol, 82% D), [Cp\*RhCl<sub>2</sub>]<sub>2</sub> (5 mol%) and KF (0.25 mmol) in a 10 mL flask was added a solution of **2a** (0.325 mmol) in MeOH (4.0 mL). Then the flask was capped with septa, and the resulting mixture was stirred at 60 °C in an oil bath for 1.0 h. After removal of the solvent, the residue was purified by flash chromatography on silica gel to provide the starting material (**1a** and **1a-D**) and product **3a**. The mixture of the starting materials (**1a** and **1a-D**) was analyzed by <sup>1</sup>H NMR. A kinetic isotopic effect of this reaction was determined to be  $k_H/k_D = 0.73$  ( $0.47/0.53 \times 0.82$ ).

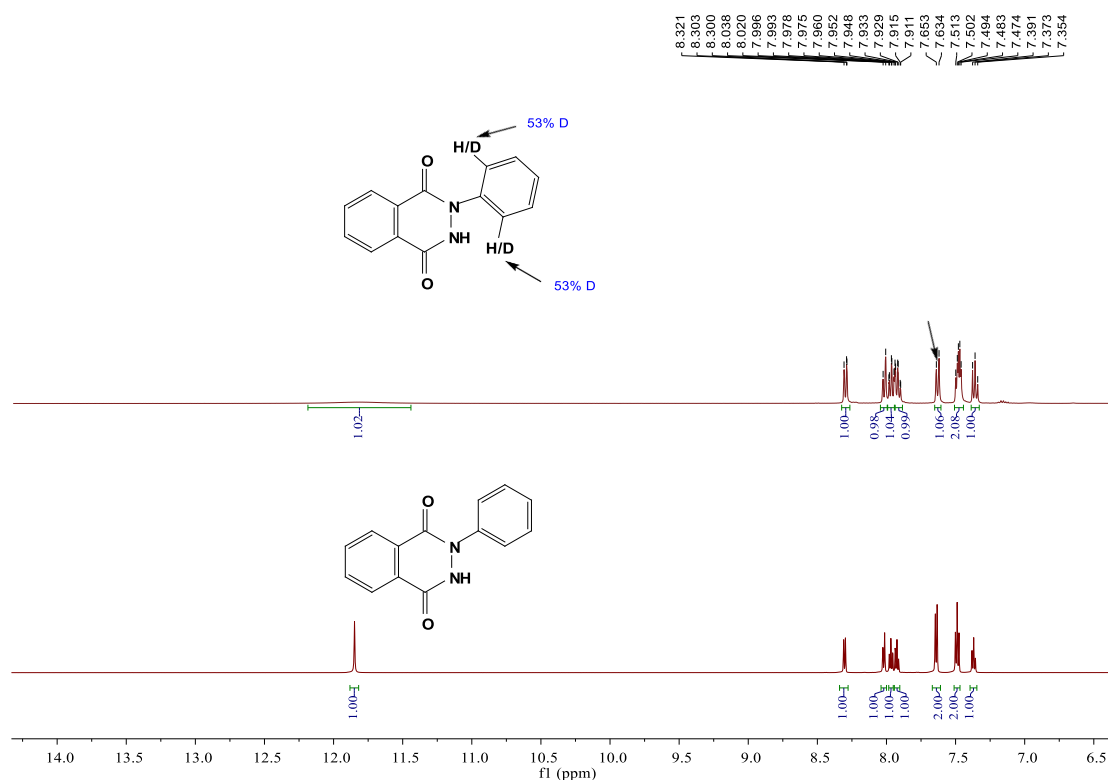

## (2) Two parallel reactions for KIE value measurement

To a mixture of **1a** (0.25 mmol), [Cp\*RhCl<sub>2</sub>]<sub>2</sub> (5 mol%) and KF (0.25 mmol) in a 10.0 mL flask was added a solution of **2a** (0.325 mmol) in MeOH (4.0 mL). Then the flask was capped with septa, and the resulting mixture was stirred at 60 °C in an oil bath for 1.0 h. After removal of the solvent, the residue was purified by flash chromatography on silica gel to provide the product **3a** (14 mg, yield 12%).

To a mixture of **1a-D** (0.25 mmol, 82% D), [Cp\*RhCl<sub>2</sub>]<sub>2</sub> (5 mol%) and KF (0.25 mmol) in a 10.0 mL flask was added a solution of **2a** (0.325 mmol) in MeOH (4.0 mL). Then the flask was capped with septa, and the resulting mixture was stirred at 60 °C in an oil bath for 1.0 h. After removal of the solvent, the residue was purified by flash chromatography on silica gel to provide the product **3a** (14.5 mg, yield 13%).

A kinetic isotopic effect of these two reactions was determined to be  $k_H/k_D = 0.79$  (14/14.5\*0.82).

## Synthetic procedure for Rh-complex

### (3) Procedure for the Synthesis of [Cp\*Rh(Phthalazine-dione)DMSO] Complex (**4a**)<sup>5</sup>

To a sealed tube with a screwcap, **1a** (0.1 mmol), [Cp\*RhCl<sub>2</sub>]<sub>2</sub> (1.0 equiv), NaOAc (5 equiv), and DCM (2.5 mL) were added. The tube was tightly capped after purging with N<sub>2</sub> gas, and the reaction was allowed to stir at 25 °C for 12 h. The reaction mixture was filtered through Celite pad and washed with DCM. The filtrate was concentrated to reduce the volume to 0.5 mL. Then DMSO (0.5 mL) was added, and the resulting mixture was allowed to settle down for 12 h. Later, the reaction mixture was quenched with water and extracted with DCM (3 × 15 mL). The organic layers were combined, dried over anhydrous sodium sulfate and concentrated under reduced pressure to afford the desired complex **4a** in 68% yield.

[Cp\*Rh(Phthalazine-dione)DMSO] Complex (**4a**). Orange solid (38 mg, 68%). Mp 171–172 °C. **<sup>1</sup>H NMR (400 MHz, CDCl<sub>3</sub>)** δ 8.51 (d, *J* = 8.2 Hz, 1H), 8.44-8.40 (m, 1H), 8.21-8.16 (m, 1H), 7.76-7.69 (m, 2H), 7.55 (d, *J* = 7.4 Hz, 1H), 7.20-7.14 (m, 1H), 7.12-7.06 (m, 1H), 3.58 (s, 3H), 2.14 (s, 3H), 1.66 (s, 15H); **<sup>13</sup>C NMR (100 MHz, CDCl<sub>3</sub>)** δ 163.0, 159.1, 151.4, 151.1, 147.4, 135.9, 132.7, 131.5, 130.1, 129.6, 129.6, 127.5, 126.1, 125.3, 119.2, 101.1, 101.1, 9.5; **HRMS (ESI) *m/z***: [M + H]<sup>+</sup> Calculated for C<sub>24</sub>H<sub>24</sub>N<sub>2</sub>O<sub>2</sub>Rh C<sub>29</sub>H<sub>28</sub>FN<sub>2</sub>O<sub>2</sub><sup>+</sup> 475.0887; Found 475.0889.

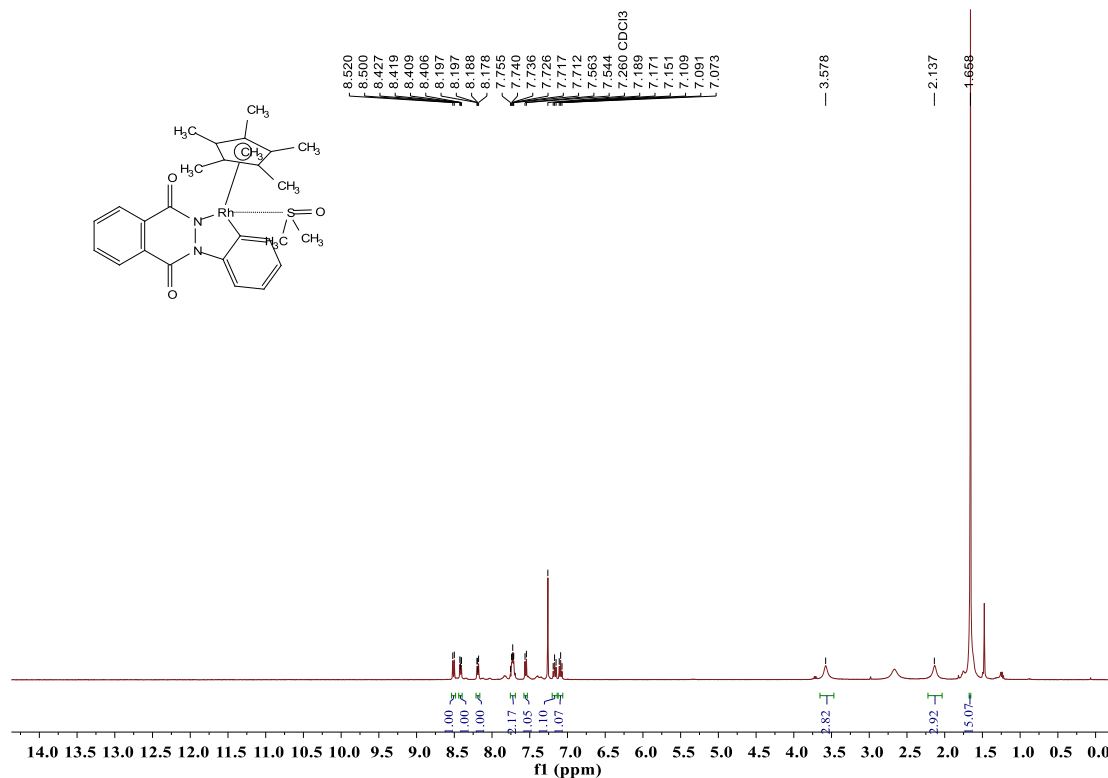

<sup>1</sup>H NMR spectra of **4a**

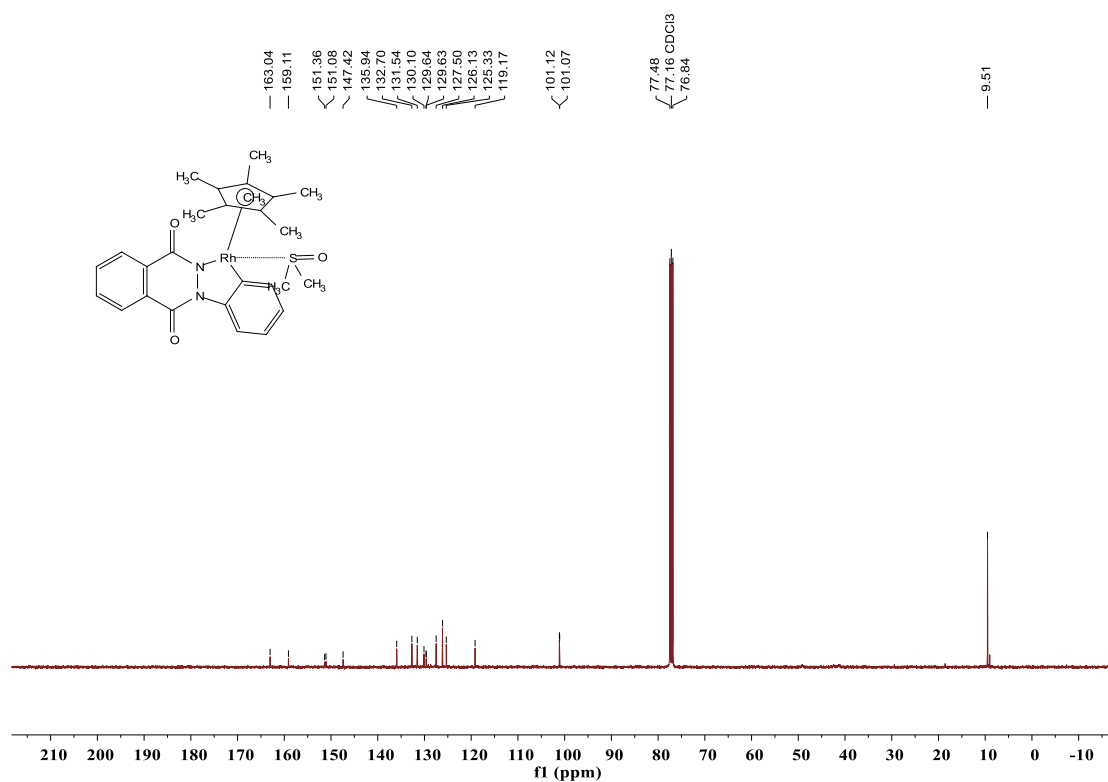

<sup>13</sup>C NMR spectra of **4a**

## Possible Intermediates and Side Products Trapped by HRMS

JXW6-6

pos\_JXW6-6 647 (3.805) AM (Cen:4, 80.00, Ar:10000.0,0.00,0.00); Cm (647-(415:599+682:784))

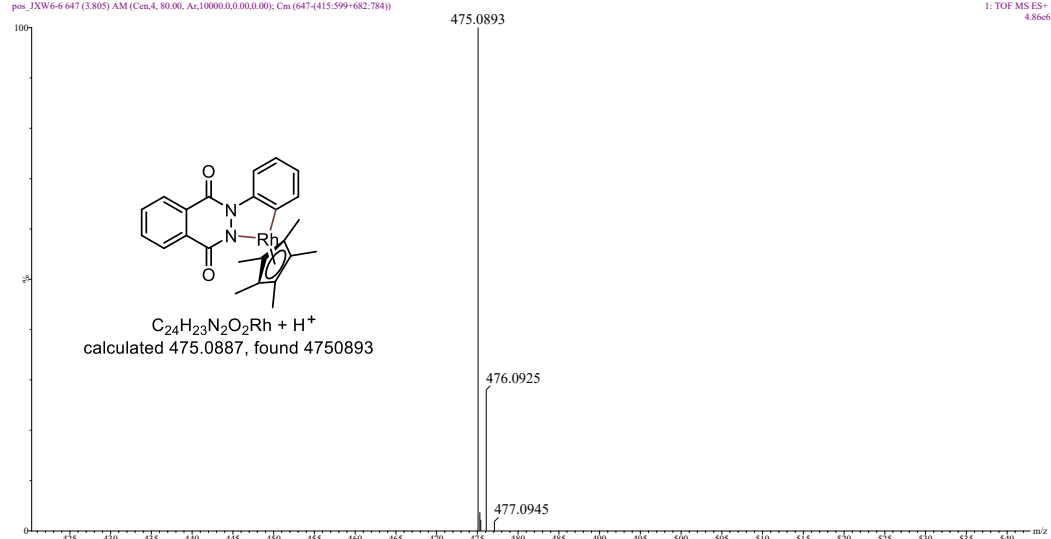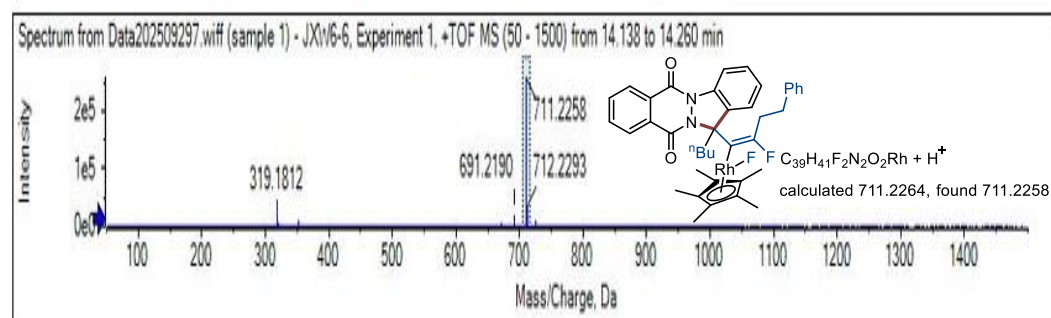

JXW6-6

pos\_JXW6-6: 564 (3.354) AM (Cm, 4, 80.00, Ar, 10000.0, 0.00, 0.00); Cm (564 (321:552+651:770))

1: TOF MS ES+  
3.80e6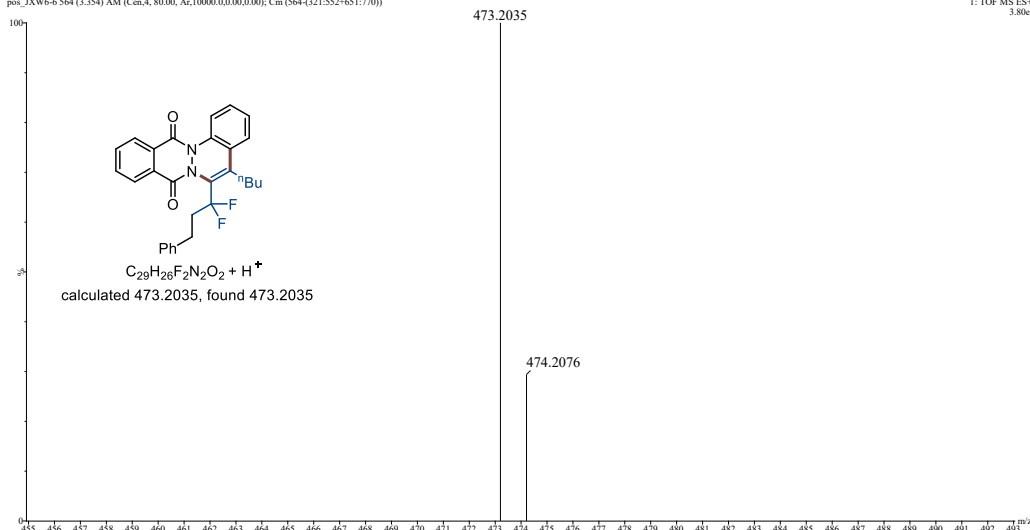

## X-ray Data of Compound **3p**

Deposition Data: CCDC 2469480 (ellipsoid contour at 30% probability level)

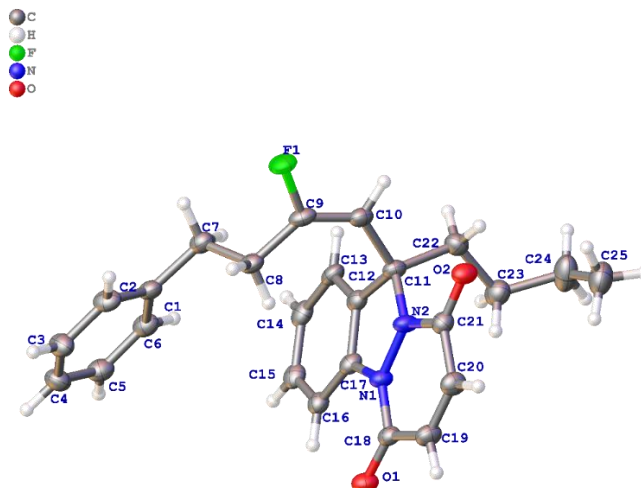

A suitable crystal of compound **3p** was obtained by slowly volatilizing a solution of **3p** in chloroform and methanol at ambient temperature. A colorless crystal of **3p** was mounted on a glass fiber at a random orientation. The data were collected by a diffractometer Rigaku Oxford Diffraction Supernova Dual Source, Cu at Zero equipped with an AtlasS2 CCD using Cu  $K\alpha$  radiation (1.54178 Å) by using a  $\omega$  scan mode. The structures were solved by direct methods using Olex2 software, and the non-hydrogen atoms were located from the trial structure and then refined anisotropically with XL using a full-matrix least squares procedure based on  $F^2$ . The weighted  $R$  factor,  $wR$  and goodness-of-fit  $S$  values were obtained based on  $F^2$ . The hydrogen atom positions were fixed geometrically at the calculated distances and allowed to ride on the parent atoms.



**Table S1 Crystal data and structure refinement for 3p.**

|                                             |                                                                |
|---------------------------------------------|----------------------------------------------------------------|
| Identification code                         | <b>3p</b>                                                      |
| Empirical formula                           | C <sub>25</sub> H <sub>25</sub> FN <sub>2</sub> O <sub>2</sub> |
| Formula weight                              | 404.47                                                         |
| Temperature/K                               | 100.1(5)                                                       |
| Crystal system                              | monoclinic                                                     |
| Space group                                 | P2 <sub>1</sub> /c                                             |
| a/Å                                         | 11.086(2)                                                      |
| b/Å                                         | 8.3538(9)                                                      |
| c/Å                                         | 22.882(4)                                                      |
| $\alpha$ /°                                 | 90                                                             |
| $\beta$ /°                                  | 94.994(14)                                                     |
| $\gamma$ /°                                 | 90                                                             |
| Volume/Å <sup>3</sup>                       | 2111.1(6)                                                      |
| Z                                           | 4                                                              |
| $\rho_{\text{calc}}$ /g/cm <sup>3</sup>     | 1.273                                                          |
| $\mu$ /mm <sup>-1</sup>                     | 0.704                                                          |
| F(000)                                      | 856.0                                                          |
| Crystal size/mm <sup>3</sup>                | 0.14 × 0.12 × 0.1                                              |
| Radiation                                   | Cu K $\alpha$ ( $\lambda$ = 1.54184)                           |
| 2 $\Theta$ range for data collection/°      | 7.756 to 147.88                                                |
| Index ranges                                | -13 ≤ h ≤ 13, -7 ≤ k ≤ 10, -28 ≤ l ≤ 19                        |
| Reflections collected                       | 8224                                                           |
| Independent reflections                     | 4139 [ $R_{\text{int}}$ = 0.0959, $R_{\text{sigma}}$ = 0.1241] |
| Data/restraints/parameters                  | 4139/9/283                                                     |
| Goodness-of-fit on F <sup>2</sup>           | 0.974                                                          |
| Final R indexes [ $I \geq 2\sigma(I)$ ]     | $R_1$ = 0.0655, $wR_2$ = 0.1475                                |
| Final R indexes [all data]                  | $R_1$ = 0.1181, $wR_2$ = 0.1891                                |
| Largest diff. peak/hole / e Å <sup>-3</sup> | 0.25/-0.29                                                     |

**Crystal structure determination of 3p**

**Crystal Data** for C<sub>25</sub>H<sub>25</sub>FN<sub>2</sub>O<sub>2</sub> ( $M$  = 404.47 g/mol): monoclinic, space group P2<sub>1</sub>/c (no. 14),  $a$  = 11.086(2) Å,  $b$  = 8.3538(9) Å,  $c$  = 22.882(4) Å,  $\beta$  = 94.994(14)°,  $V$  = 2111.1(6) Å<sup>3</sup>,  $Z$  = 4,  $T$  = 100.1(5) K,  $\mu$ (Cu K $\alpha$ ) = 0.704 mm<sup>-1</sup>,  $D_{\text{calc}}$  = 1.273 g/cm<sup>3</sup>, 8224 reflections measured (7.756° ≤ 2 $\Theta$  ≤ 147.88°), 4139 unique ( $R_{\text{int}}$  = 0.0959,  $R_{\text{sigma}}$  = 0.1241) which were used in all calculations. The final  $R_1$  was 0.0655 ( $I > 2\sigma(I)$ ) and  $wR_2$  was 0.1891 (all data).

CCDC 2469480 contains the supplementary crystallographic data for compound **3p**. These data can be also obtained free of charge from The Cambridge Crystallographic Data Centre via [www.ccdc.cam.ac.uk/data\\_request/cif](http://www.ccdc.cam.ac.uk/data_request/cif).

## References

1. D. Poli, D. Catarzi, V. Colotta, F. Varano, G. Filacchioni, S. Daniele, L. Trincavelli, C. Martini, S. Paoletta and S. Moro, *J. Med. Chem.*, 2011, **54**, 2102–2113.
2. S. Rajkumar, S. A. Savarimuthu, R.-S. Kumaran, C. M. Nagarajad and T. Gandhi, *Chem. Commun.*, 2016, **52**, 2509–2512.
3. X. Wu, P. Li, Y. Lu, J. Qiao, J. Zhao, X. Jia, H. Ni, L. Kong, X. Zhang and F. Zhao, *Adv. Synth. Catal.*, 2020, **362**, 2953–2960.
4. C.-Q. Wang, L. Ye, C. Feng and T.-P. Loh, *J. Am. Chem. Soc.*, 2017, **139**, 1762–1765.
5. P. Karishma, C. K. Mahesha, S. K. Mandal and R. Sakhuja, *J. Org. Chem.*, 2021, **86**, 2734–274.

**(*E*)-13-butyl-13-(2-fluoro-4-phenylbut-1-en-1-yl)-13*H*-indazolo[1,2-*b*]phthalazine-6,11-dione**  
**(3a)**

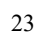

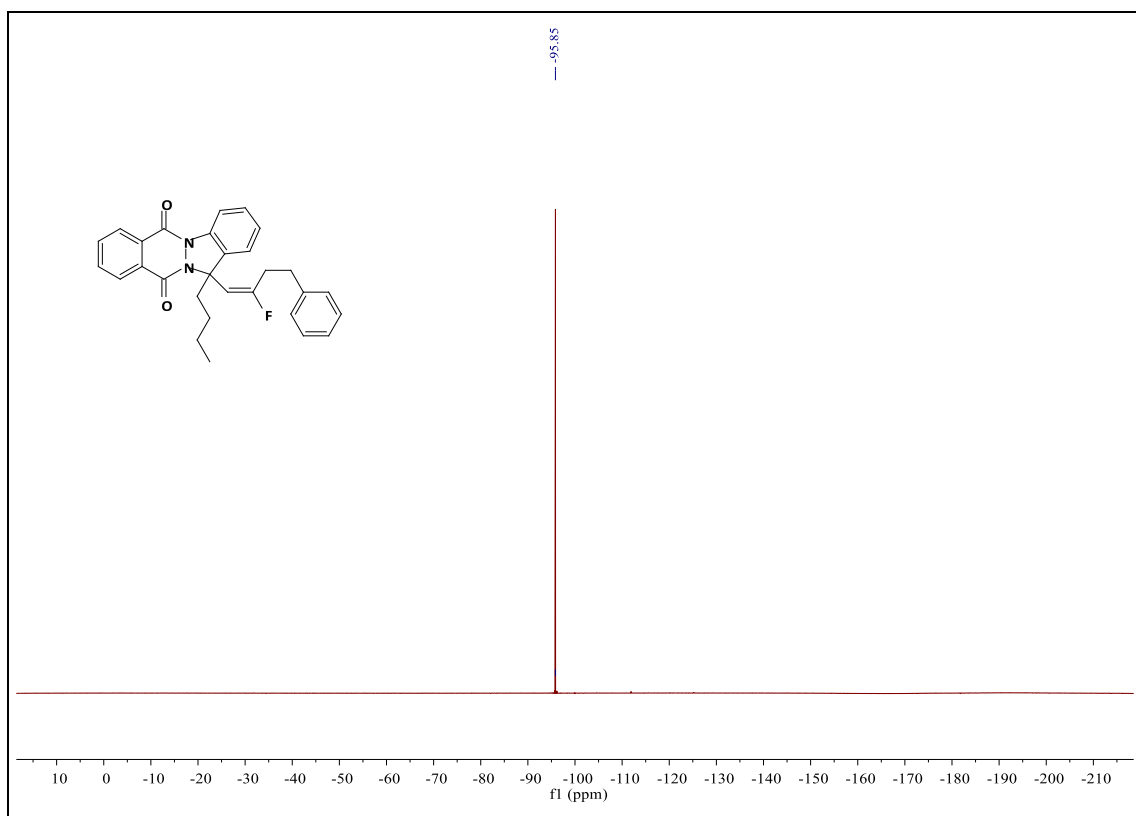

The figure displays the chemical structure of compound 10 and its corresponding <sup>1</sup>H and <sup>13</sup>C NMR spectra. The chemical structure is a spirocyclic compound consisting of a phthalimide core fused to a 2,6-difluorophenyl ring, which is further substituted with a 2-fluorophenyl group and a propyl group.

The <sup>1</sup>H NMR spectrum (top) was recorded in CDCl<sub>3</sub> and shows peaks in the aromatic region (6.5–8.5 ppm) and aliphatic region (0.5–3.0 ppm). The x-axis ranges from 13.0 to 0.0 ppm. Integration values are provided below the baseline.

The <sup>13</sup>C NMR spectrum (bottom) was recorded in CDCl<sub>3</sub> and shows peaks in the aromatic region (110–165 ppm) and aliphatic region (13–40 ppm). The x-axis ranges from 210 to 0 ppm. The solvent triplet for CDCl<sub>3</sub> is visible at 77.16 ppm.

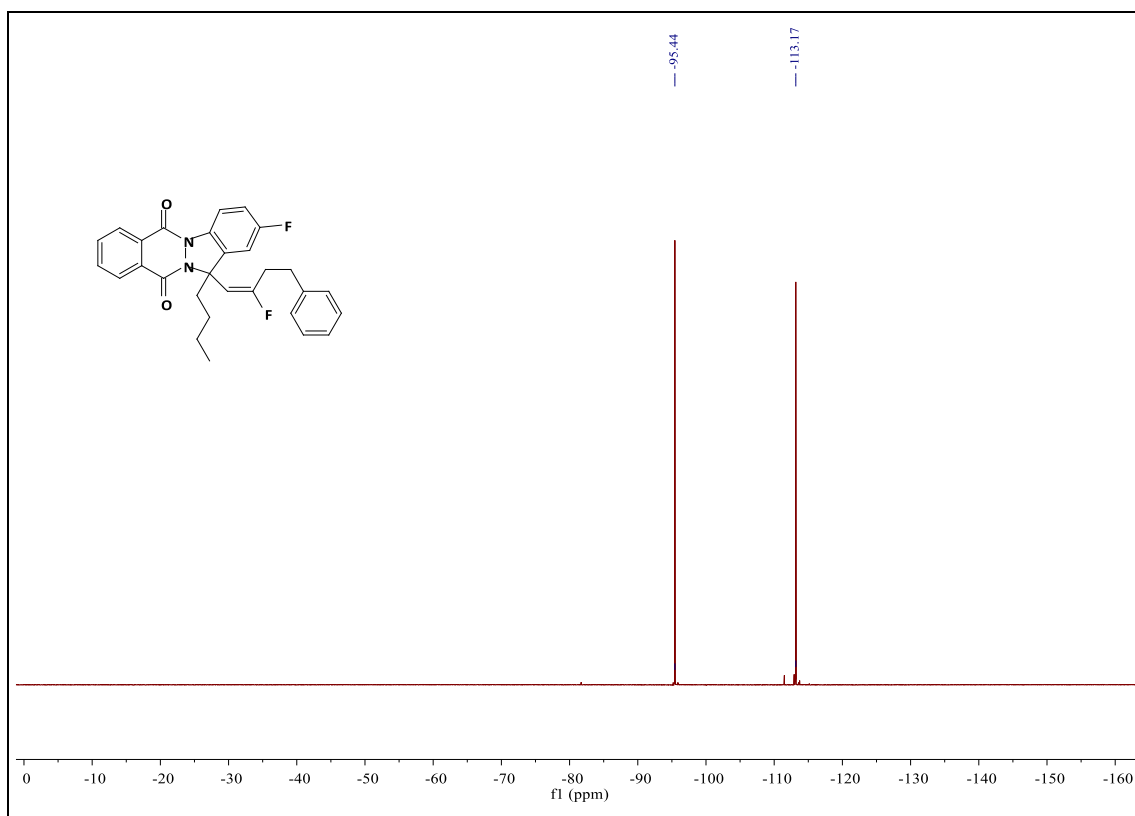

**(*E*)-13-butyl-2-chloro-13-(2-fluoro-4-phenylbut-1-en-1-yl)-13*H*-indazolo[1,2-*b*]phthalazine-6,11-dione (3c)**

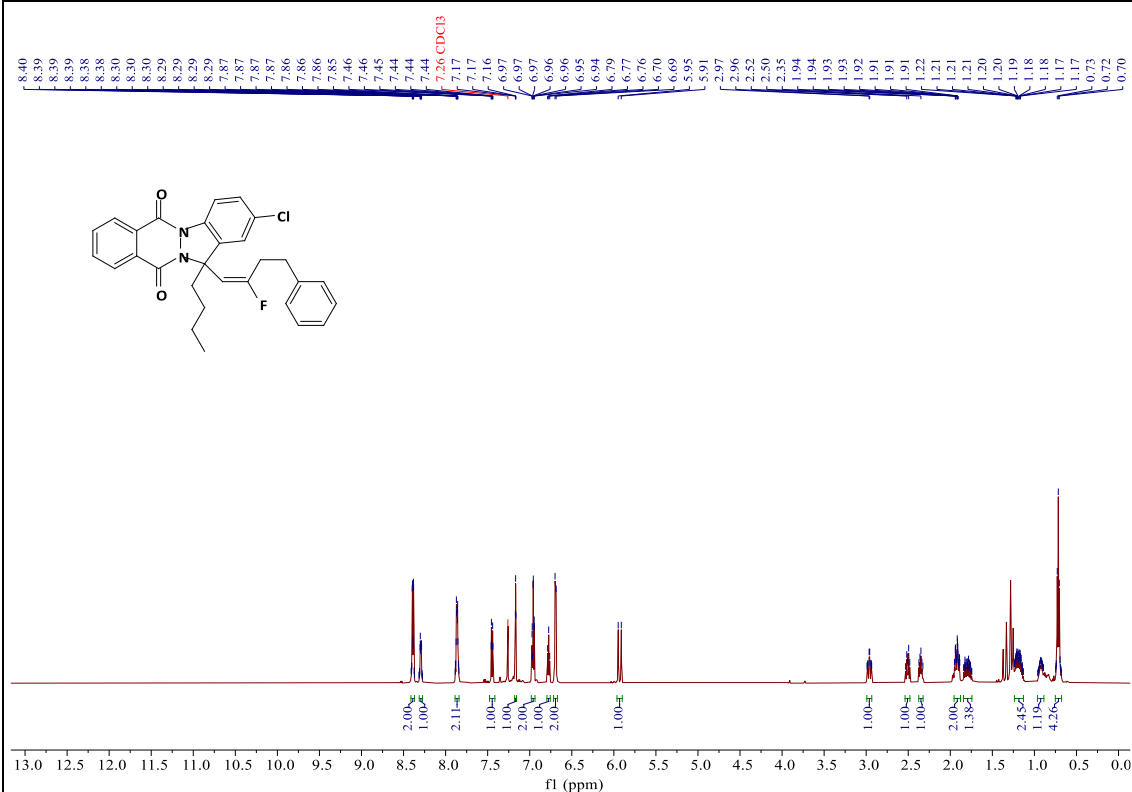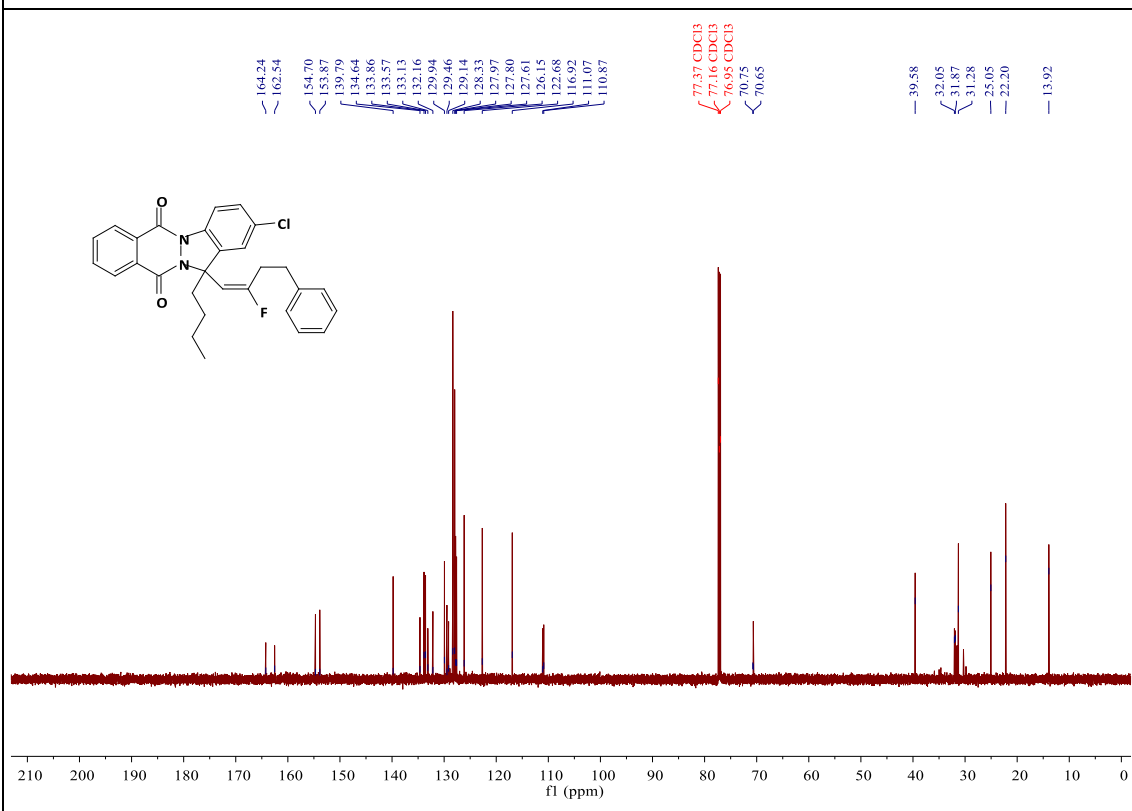

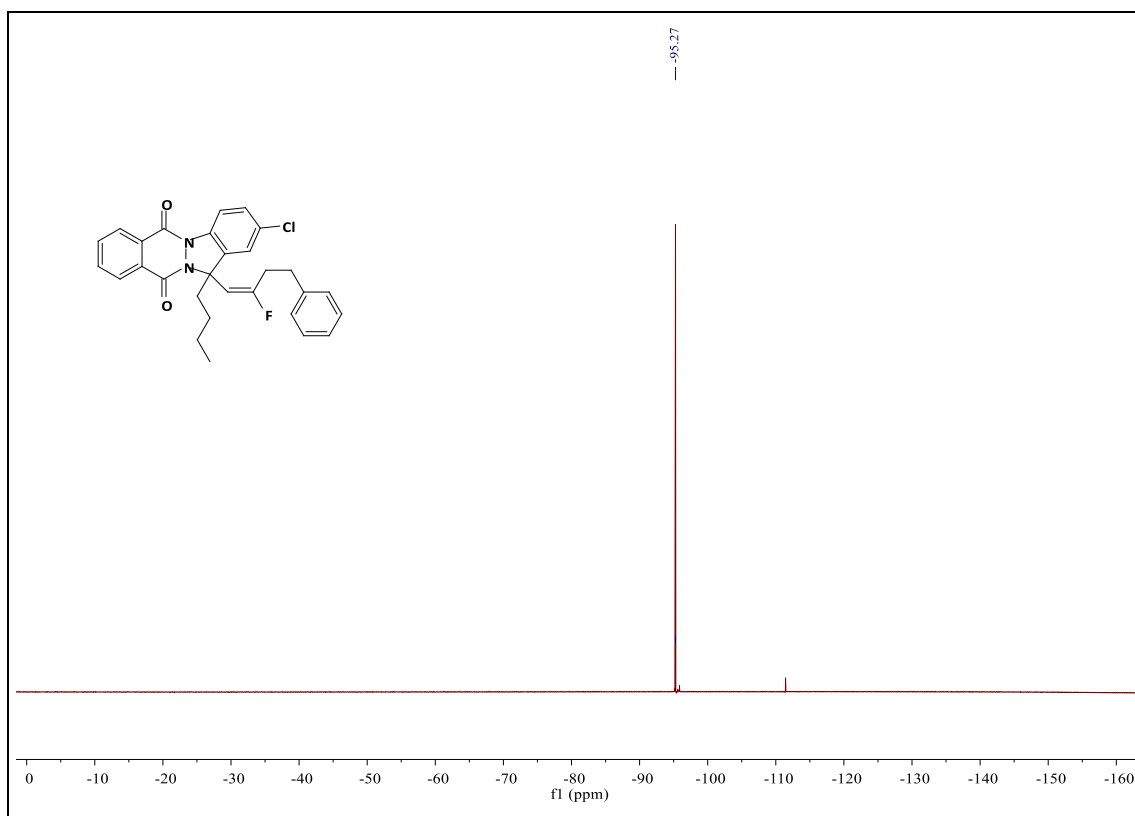



The figure displays the chemical structure of compound 10 and its corresponding <sup>1</sup>H and <sup>13</sup>C NMR spectra. The chemical structure is a spirocyclic compound consisting of a phthalimide core fused to a 4-bromophenyl ring, with a 1-phenyl-2-(2-fluorophenyl)ethyl substituent at the spiro center.

**<sup>1</sup>H NMR Spectrum (CDCl<sub>3</sub>):** The spectrum shows peaks in the aromatic region (6.5–8.4 ppm) and aliphatic region (0.7–3.0 ppm). Integration values are provided below the baseline.

| Chemical Shift (ppm)                                                                                                                                                                                                                                                                                                                                                                                                                                                                                                                                                                                                                                                                                                                                                                                                                                                                                                                                                                                                                                                                                                                                                                                                                                                                                                                                                                                                                                                                                                                                                                                                                                                                                                                                                                                                                                                                                                                                                                                                                                                                                                                                                                                                                                                                                                                                                                                                                                                                                                                                                                                                                                                                                                                                                                                                                                                                                                                                                                                                                                                                                                                                                                                                                                                                                                                                                                                                                                                                                                                                                                                                                                                                                                                                                                                                                                                                                                                                                                                                                  | Integration |
|---------------------------------------------------------------------------------------------------------------------------------------------------------------------------------------------------------------------------------------------------------------------------------------------------------------------------------------------------------------------------------------------------------------------------------------------------------------------------------------------------------------------------------------------------------------------------------------------------------------------------------------------------------------------------------------------------------------------------------------------------------------------------------------------------------------------------------------------------------------------------------------------------------------------------------------------------------------------------------------------------------------------------------------------------------------------------------------------------------------------------------------------------------------------------------------------------------------------------------------------------------------------------------------------------------------------------------------------------------------------------------------------------------------------------------------------------------------------------------------------------------------------------------------------------------------------------------------------------------------------------------------------------------------------------------------------------------------------------------------------------------------------------------------------------------------------------------------------------------------------------------------------------------------------------------------------------------------------------------------------------------------------------------------------------------------------------------------------------------------------------------------------------------------------------------------------------------------------------------------------------------------------------------------------------------------------------------------------------------------------------------------------------------------------------------------------------------------------------------------------------------------------------------------------------------------------------------------------------------------------------------------------------------------------------------------------------------------------------------------------------------------------------------------------------------------------------------------------------------------------------------------------------------------------------------------------------------------------------------------------------------------------------------------------------------------------------------------------------------------------------------------------------------------------------------------------------------------------------------------------------------------------------------------------------------------------------------------------------------------------------------------------------------------------------------------------------------------------------------------------------------------------------------------------------------------------------------------------------------------------------------------------------------------------------------------------------------------------------------------------------------------------------------------------------------------------------------------------------------------------------------------------------------------------------------------------------------------------------------------------------------------------------------------|-------------|
| 8.39, 8.38, 8.34, 8.32, 8.30, 8.29, 8.28, 8.27, 8.26, 8.25, 8.24, 8.23, 8.22, 8.21, 8.20, 8.19, 8.18, 8.17, 8.16, 8.15, 8.14, 8.13, 8.12, 8.11, 8.10, 8.09, 8.08, 8.07, 8.06, 8.05, 8.04, 8.03, 8.02, 8.01, 8.00, 7.99, 7.98, 7.97, 7.96, 7.95, 7.94, 7.93, 7.92, 7.91, 7.90, 7.89, 7.88, 7.87, 7.86, 7.85, 7.84, 7.83, 7.82, 7.81, 7.80, 7.79, 7.78, 7.77, 7.76, 7.75, 7.74, 7.73, 7.72, 7.71, 7.70, 7.69, 7.68, 7.67, 7.66, 7.65, 7.64, 7.63, 7.62, 7.61, 7.60, 7.59, 7.58, 7.57, 7.56, 7.55, 7.54, 7.53, 7.52, 7.51, 7.50, 7.49, 7.48, 7.47, 7.46, 7.45, 7.44, 7.43, 7.42, 7.41, 7.40, 7.39, 7.38, 7.37, 7.36, 7.35, 7.34, 7.33, 7.32, 7.31, 7.30, 7.29, 7.28, 7.27, 7.26, 7.25, 7.24, 7.23, 7.22, 7.21, 7.20, 7.19, 7.18, 7.17, 7.16, 7.15, 7.14, 7.13, 7.12, 7.11, 7.10, 7.09, 7.08, 7.07, 7.06, 7.05, 7.04, 7.03, 7.02, 7.01, 7.00, 6.99, 6.98, 6.97, 6.96, 6.95, 6.94, 6.93, 6.92, 6.91, 6.90, 6.89, 6.88, 6.87, 6.86, 6.85, 6.84, 6.83, 6.82, 6.81, 6.80, 6.79, 6.78, 6.77, 6.76, 6.75, 6.74, 6.73, 6.72, 6.71, 6.70, 6.69, 6.68, 6.67, 6.66, 6.65, 6.64, 6.63, 6.62, 6.61, 6.60, 6.59, 6.58, 6.57, 6.56, 6.55, 6.54, 6.53, 6.52, 6.51, 6.50, 6.49, 6.48, 6.47, 6.46, 6.45, 6.44, 6.43, 6.42, 6.41, 6.40, 6.39, 6.38, 6.37, 6.36, 6.35, 6.34, 6.33, 6.32, 6.31, 6.30, 6.29, 6.28, 6.27, 6.26, 6.25, 6.24, 6.23, 6.22, 6.21, 6.20, 6.19, 6.18, 6.17, 6.16, 6.15, 6.14, 6.13, 6.12, 6.11, 6.10, 6.09, 6.08, 6.07, 6.06, 6.05, 6.04, 6.03, 6.02, 6.01, 6.00, 5.99, 5.98, 5.97, 5.96, 5.95, 5.94, 5.93, 5.92, 5.91, 5.90, 5.89, 5.88, 5.87, 5.86, 5.85, 5.84, 5.83, 5.82, 5.81, 5.80, 5.79, 5.78, 5.77, 5.76, 5.75, 5.74, 5.73, 5.72, 5.71, 5.70, 5.69, 5.68, 5.67, 5.66, 5.65, 5.64, 5.63, 5.62, 5.61, 5.60, 5.59, 5.58, 5.57, 5.56, 5.55, 5.54, 5.53, 5.52, 5.51, 5.50, 5.49, 5.48, 5.47, 5.46, 5.45, 5.44, 5.43, 5.42, 5.41, 5.40, 5.39, 5.38, 5.37, 5.36, 5.35, 5.34, 5.33, 5.32, 5.31, 5.30, 5.29, 5.28, 5.27, 5.26, 5.25, 5.24, 5.23, 5.22, 5.21, 5.20, 5.19, 5.18, 5.17, 5.16, 5.15, 5.14, 5.13, 5.12, 5.11, 5.10, 5.09, 5.08, 5.07, 5.06, 5.05, 5.04, 5.03, 5.02, 5.01, 5.00, 4.99, 4.98, 4.97, 4.96, 4.95, 4.94, 4.93, 4.92, 4.91, 4.90, 4.89, 4.88, 4.87, 4.86, 4.85, 4.84, 4.83, 4.82, 4.81, 4.80, 4.79, 4.78, 4.77, 4.76, 4.75, 4.74, 4.73, 4.72, 4.71, 4.70, 4.69, 4.68, 4.67, 4.66, 4.65, 4.64, 4.63, 4.62, 4.61, 4.60, 4.59, 4.58, 4.57, 4.56, 4.55, 4.54, 4.53, 4.52, 4.51, 4.50, 4.49, 4.48, 4.47, 4.46, 4.45, 4.44, 4.43, 4.42, 4.41, 4.40, 4.39, 4.38, 4.37, 4.36, 4.35, 4.34, 4.33, 4.32, 4.31, 4.30, 4.29, 4.28, 4.27, 4.26, 4.25, 4.24, 4.23, 4.22, 4.21, 4.20, 4.19, 4.18, 4.17, 4.16, 4.15, 4.14, 4.13, 4.12, 4.11, 4.10, 4.09, 4.08, 4.07, 4.06, 4.05, 4.04, 4.03, 4.02, 4.01, 4.00, 3.99, 3.98, 3.97, 3.96, 3.95, 3.94, 3.93, 3.92, 3.91, 3.90, 3.89, 3.88, 3.87, 3.86, 3.85, 3.84, 3.83, 3.82, 3.81, 3.80, 3.79, 3.78, 3.77, 3.76, 3.75, 3.74, 3.73, 3.72, 3.71, 3.70, 3.69, 3.68, 3.67, 3.66, 3.65, 3.64, 3.63, 3.62, 3.61, 3.60, 3.59, 3.58, 3.57, 3.56, 3.55, 3.54, 3.53, 3.52, 3.51, 3.50, 3.49, 3.48, 3.47, 3.46, 3.45, 3.44, 3.43, 3.42, 3.41, 3.40, 3.39, 3.38, 3.37, 3.36, 3.35, 3.34, 3.33, 3.32, 3.31, 3.30, 3.29, 3.28, 3.27, 3.26, 3.25, 3.24, 3.23, 3.22, 3.21, 3.20, 3.19, 3.18, 3.17, 3.16, 3.15, 3.14, 3.13, 3.12, 3.11, 3.10, 3.09, 3.08, 3.07, 3.06, 3.05, 3.04, 3.03, 3.02, 3.01, 3.00, 2.99, 2.98, 2.97, 2.96, 2.95, 2.94, 2.93, 2.92, 2.91, 2.90, 2.89, 2.88, 2.87, 2.86, 2.85, 2.84, 2.83, 2.82, 2.81, 2.80, 2.79, 2.78, 2.77, 2.76, 2.75, 2.74, 2.73, 2.72, 2.71, 2.70, 2.69, 2.68, 2.67, 2.66, 2.65, 2.64, 2.63, 2.62, 2.61, 2.60, 2.59, 2.58, 2.57, 2.56, 2.55, 2.54, 2.53, 2.52, 2.51, 2.50, 2.49, 2.48, 2.47, 2.46, 2.45, 2.44, 2.43, 2.42, 2.41, 2.40, 2.39, 2.38, 2.37, 2.36, 2.35, 2.34, 2.33, 2.32, 2.31, 2.30, 2.29, 2.28, 2.27, 2.26, 2.25, 2.24, 2.23, 2.22, 2.21, 2.20, 2.19, 2.18, 2.17, 2.16, 2.15, 2.14, 2.13, 2.12, 2.11, 2.10, 2.09, 2.08, 2.07, 2.06, 2.05, 2.04, 2.03, 2.02, 2.01, 2.00, 1.99, 1.98, 1.97, 1.96, 1.95, 1.94, 1.93, 1.92, 1.91, 1.90, 1.89, 1 |             |

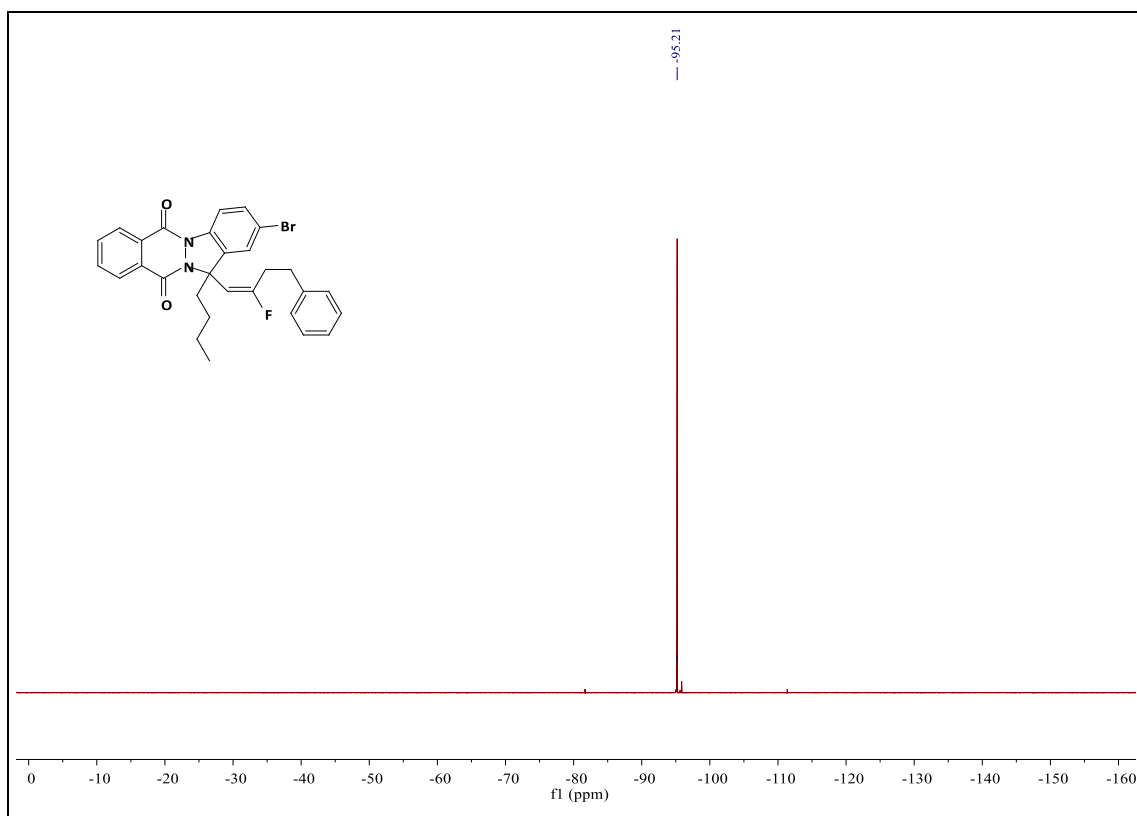

**(*E*)-13-butyl-3-chloro-13-(2-fluoro-4-phenylbut-1-en-1-yl)-13*H*-indazolo[1,2-*b*]phthalazine-6,11-dione (3e)**

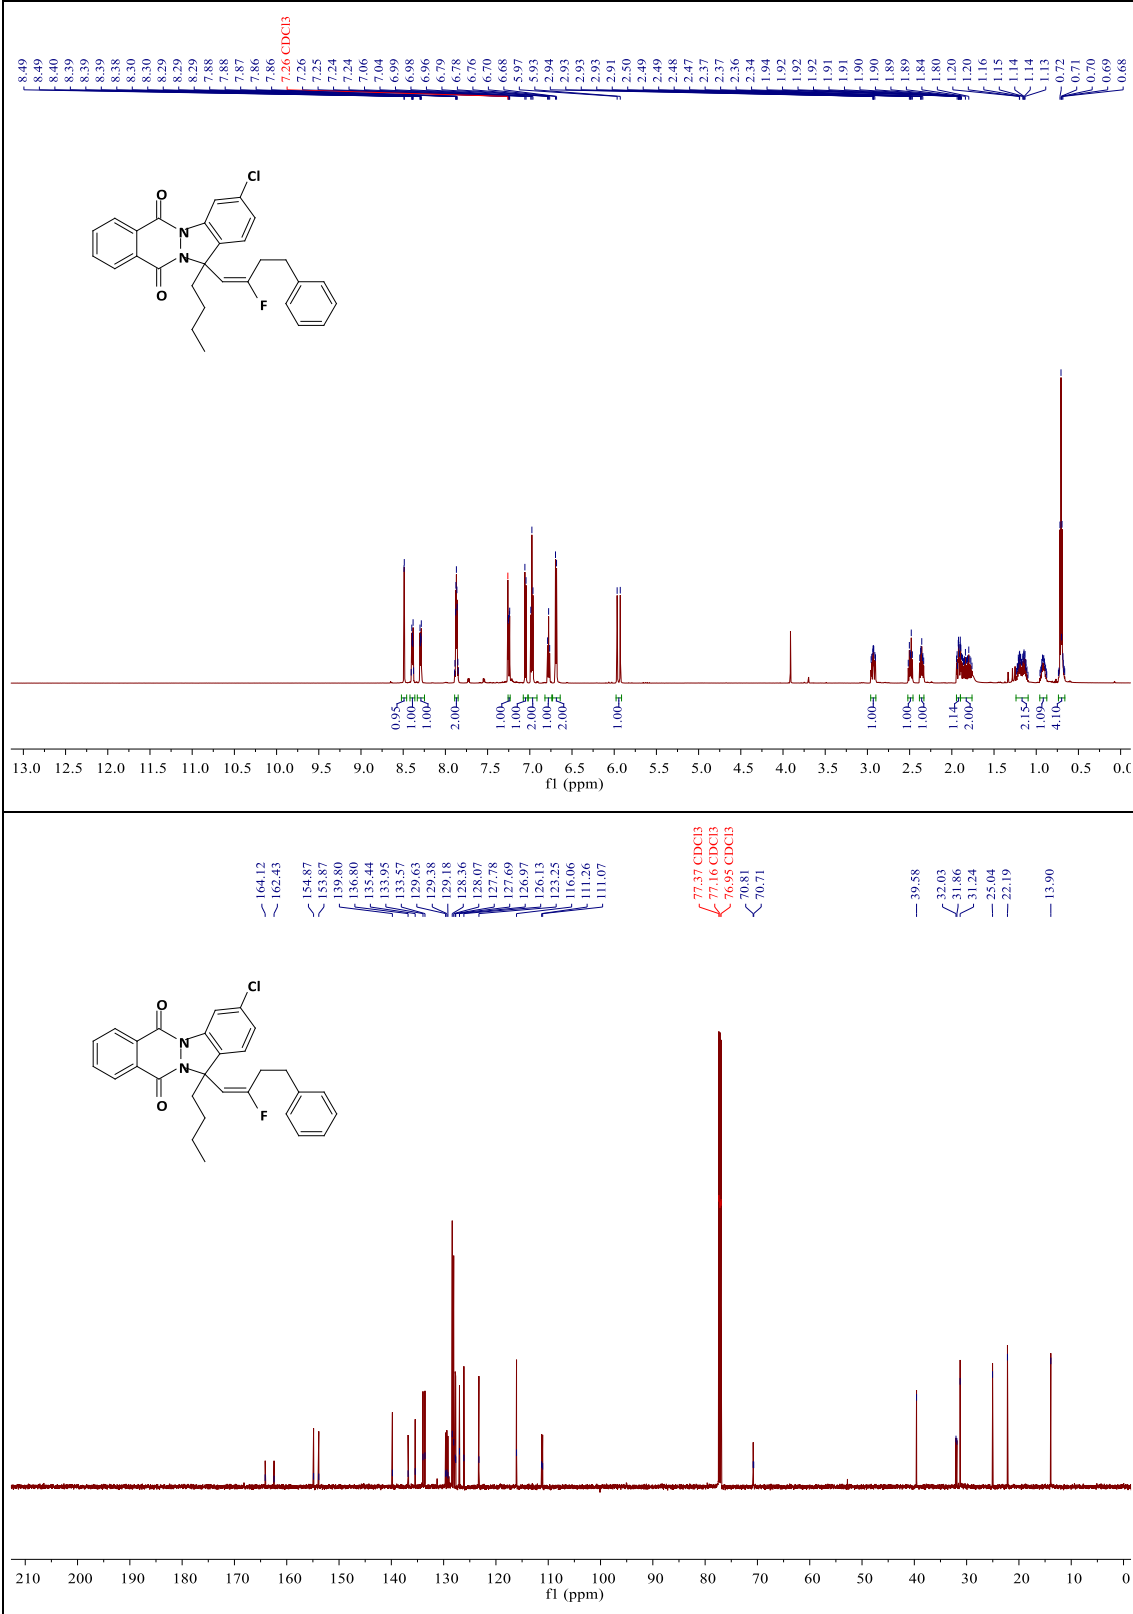

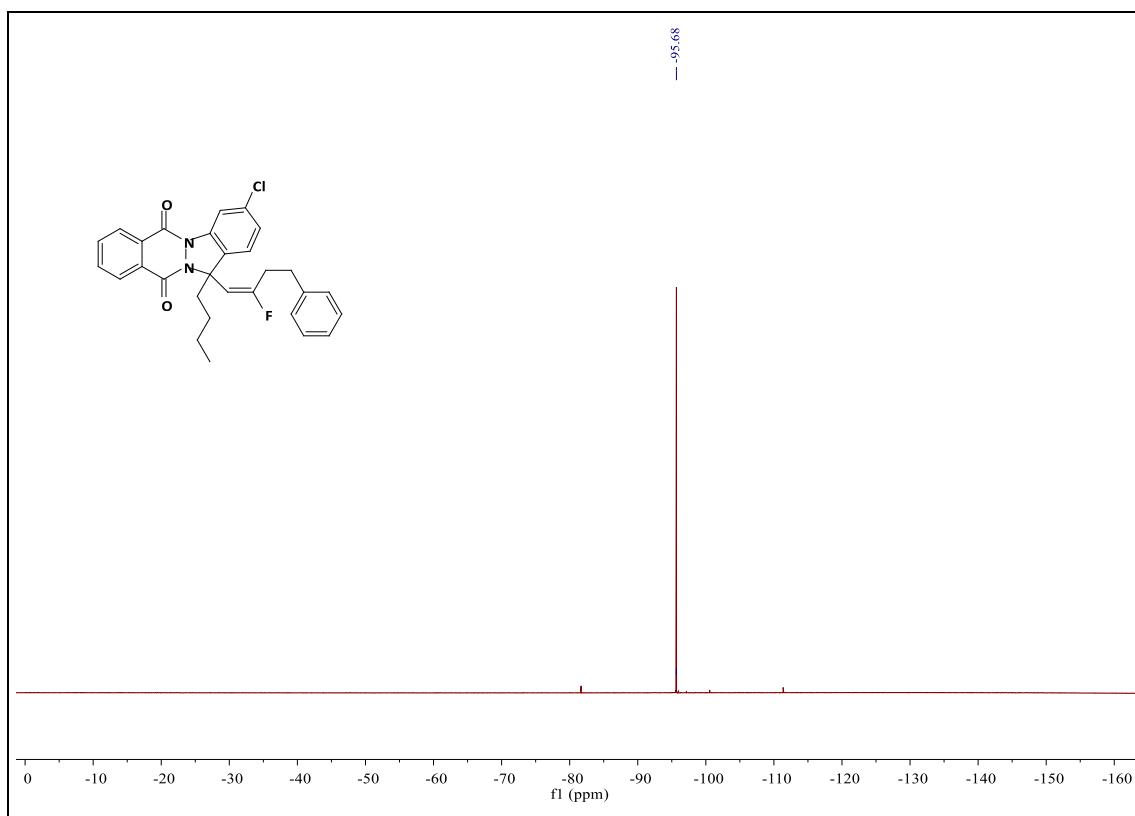

**(*E*)-3-bromo-13-butyl-13-(2-fluoro-4-phenylbut-1-en-1-yl)-13*H*-indazolo[1,2-*b*]phthalazine-6,11-dione (3f)**

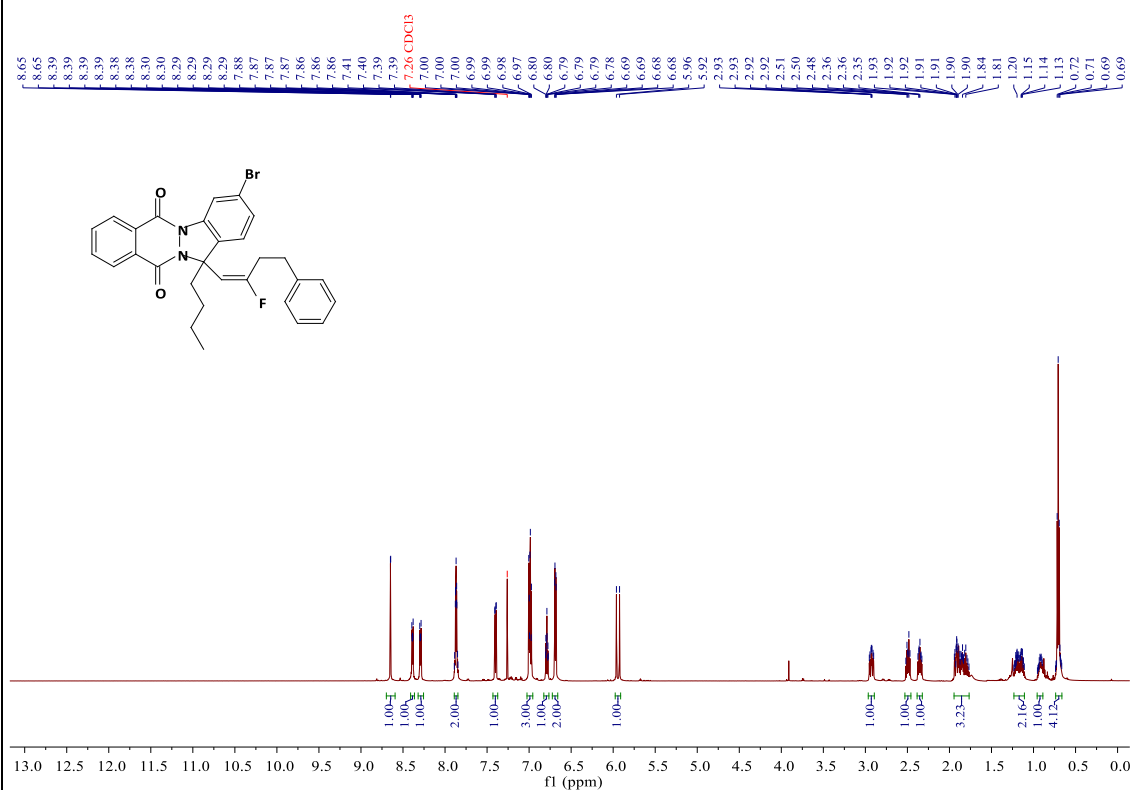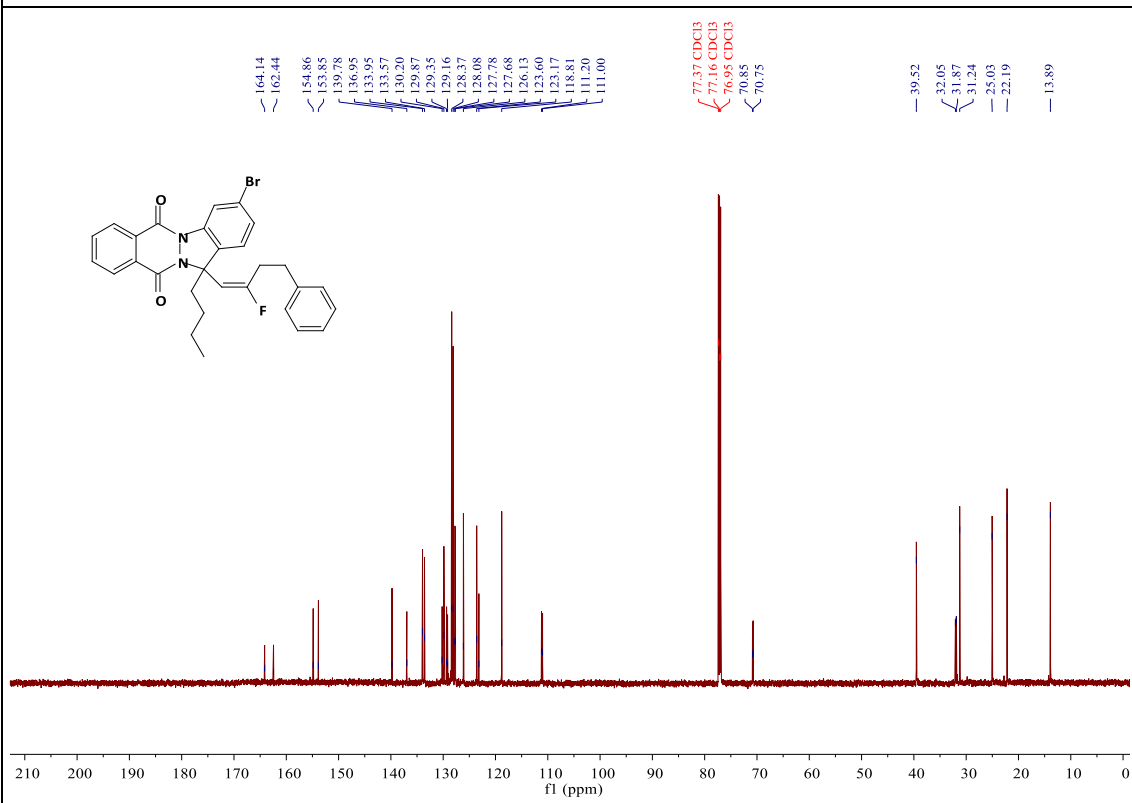

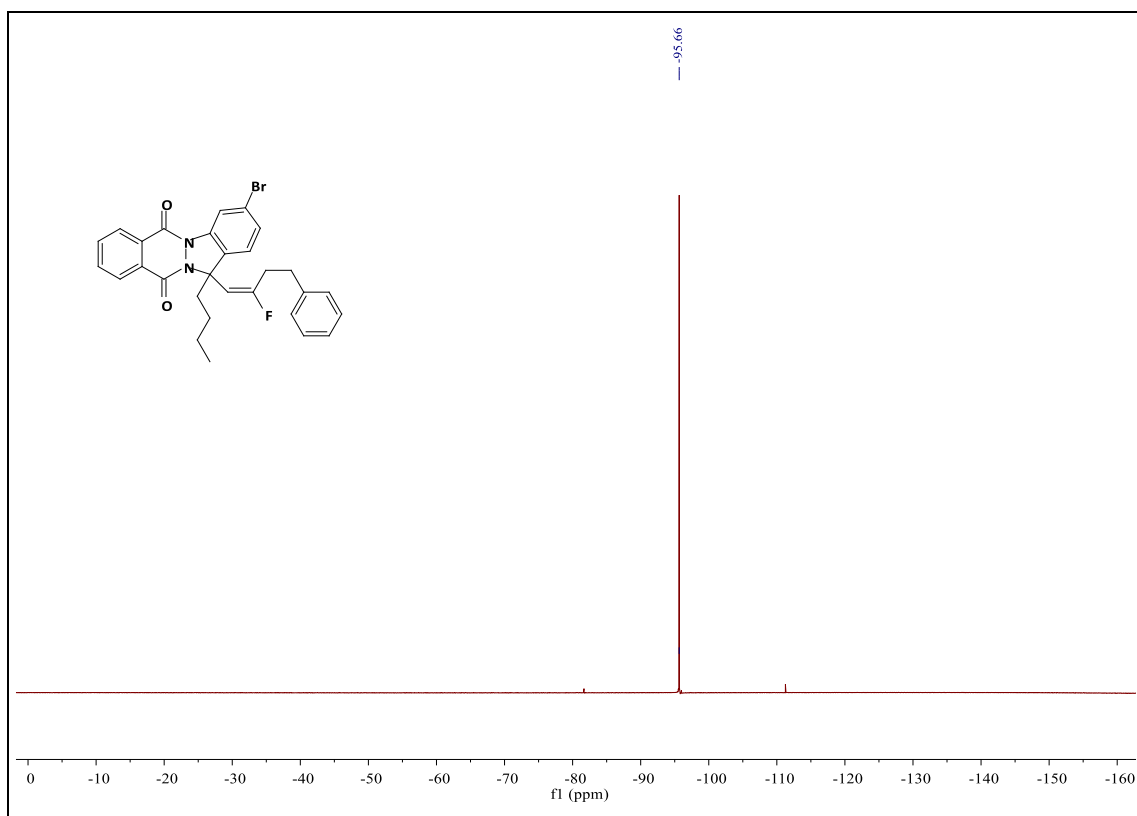

The figure displays the chemical structure of compound 10 and its corresponding <sup>1</sup>H and <sup>13</sup>C NMR spectra. The chemical structure is a spirocyclic compound consisting of a phthalimide core fused to a 2-methyl-2-phenyl-3-(2-fluorobenzyl)but-3-en-1-yl system.

**<sup>1</sup>H NMR Spectrum (CDCl<sub>3</sub>):** The spectrum shows peaks in the aromatic region (6.5–8.5 ppm) and aliphatic region (0.5–3.0 ppm). Key peaks include a doublet at 7.26 ppm (1H), a multiplet at 7.02 ppm (1H), and a large singlet at 2.47 ppm (3H). Integration values are provided below the baseline.

**<sup>13</sup>C NMR Spectrum (CDCl<sub>3</sub>):** The spectrum shows peaks from 13.94 to 164.07 ppm. Key peaks include a carbonyl at 164.07 ppm, aromatic carbons between 110–160 ppm, and aliphatic carbons at 39.57, 31.91, 31.73, 31.36, 25.05, 22.23, 21.52, and 13.94 ppm. Solvent peaks for CDCl<sub>3</sub> are marked at 77.37, 77.16, and 76.95 ppm.

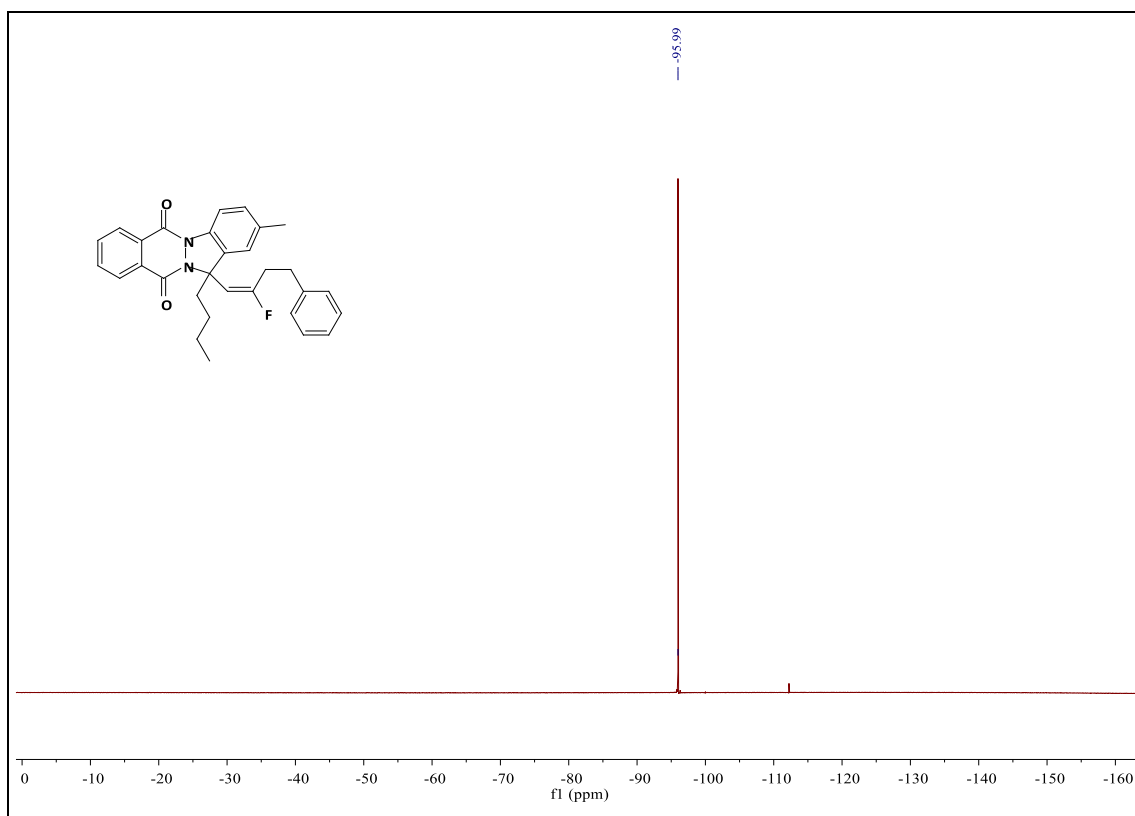



**(*E*)-13-butyl-13-(2-fluoro-4-phenylbut-1-en-1-yl)-3-methyl-13*H*-indazolo[1,2-*b*]phthalazine-6,11-dione (3i)**

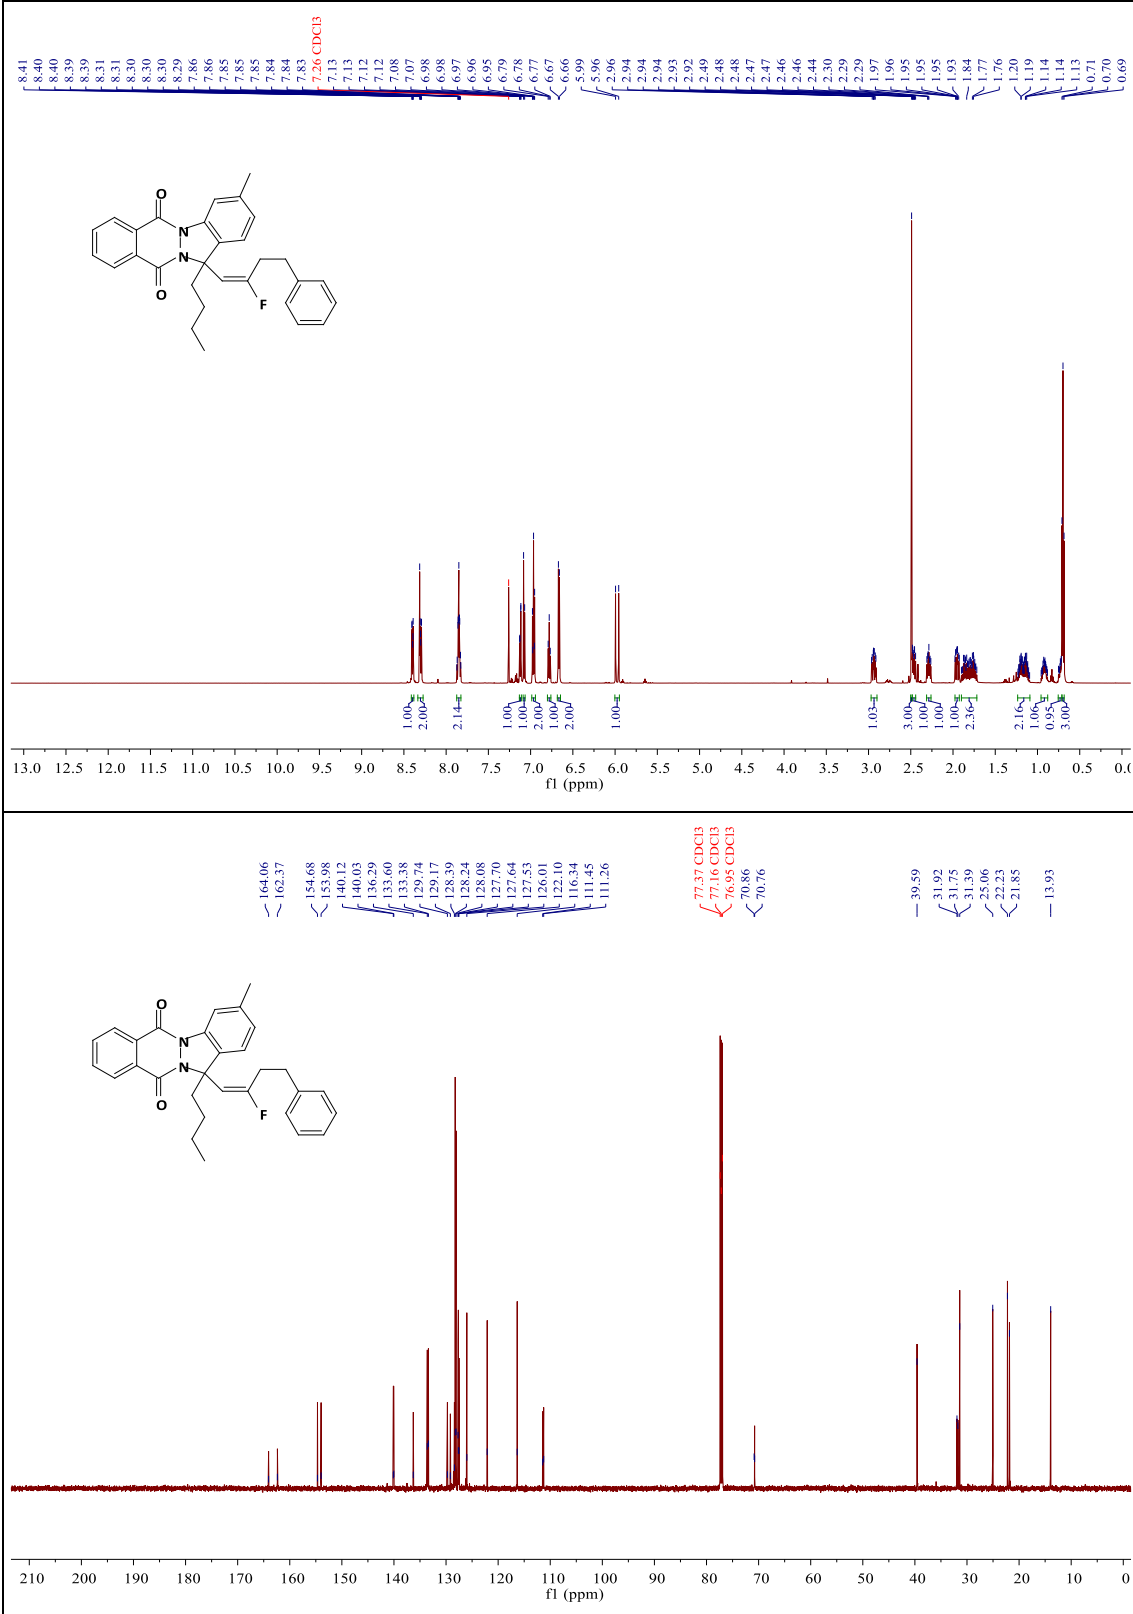

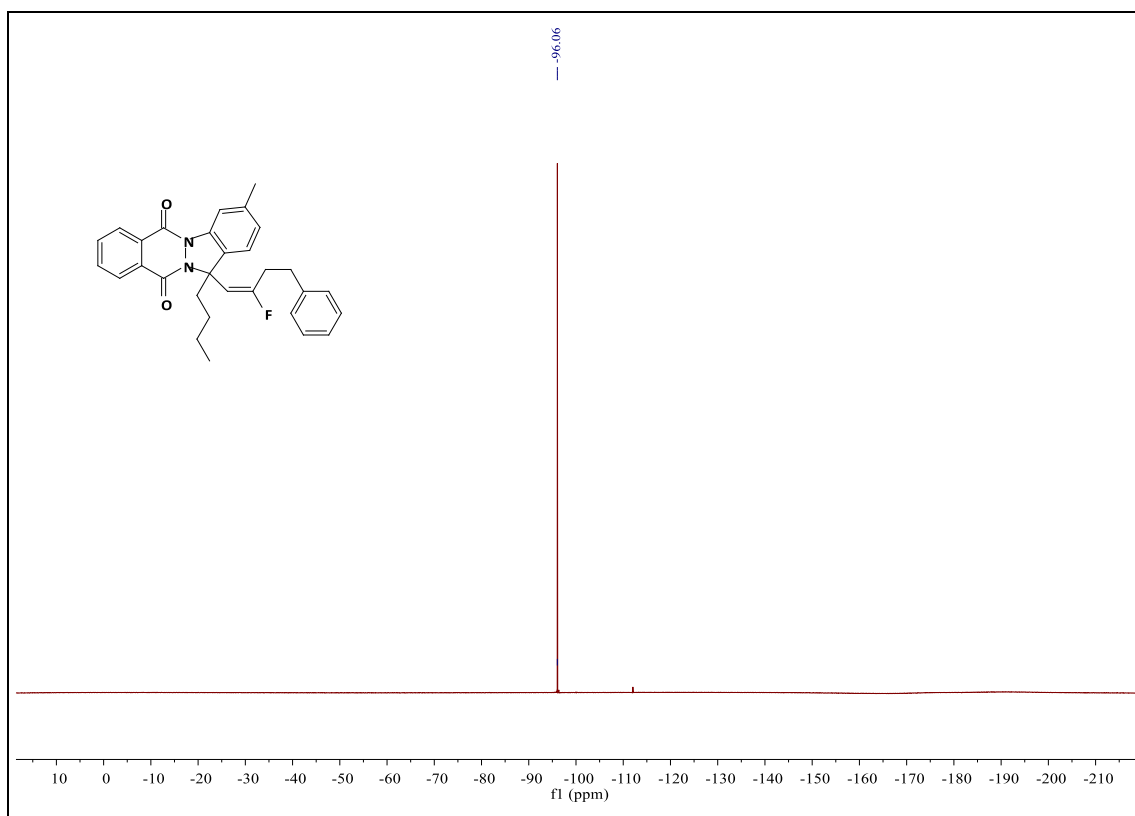

Chemical structure of compound 10: CCCC12C(=O)c3ccccc3C(=O)N1C(=C(C=C2)C(F)CCc4ccccc4)C5=CC=C(OC)C=C5

<sup>1</sup>H NMR spectrum (CDCl<sub>3</sub>) of compound 10. The x-axis represents the chemical shift in ppm (δ), ranging from 0.0 to 13.0. The spectrum shows several multiplets and singlets, with integration values indicated below the baseline.

Integration values (from left to right): 1.07, 1.07, 1.00, 2.35, 1.00, 2.04, 1.00, 1.00, 2.00, 1.00, 3.00, 1.00, 1.00, 1.04, 1.49, 2.00, 2.06, 1.13, 1.00, 3.01.

Chemical shift values (ppm): 8.39, 8.38, 8.38, 8.38, 8.37, 8.30, 8.30, 8.30, 8.29, 8.29, 8.29, 8.09, 8.09, 7.86, 7.86, 7.85, 7.84, 7.83, 7.76, 7.76, 7.05, 6.97, 6.97, 6.96, 6.95, 6.94, 6.86, 6.86, 6.85, 6.84, 6.76, 6.76, 6.75, 6.75, 6.75, 6.74, 6.74, 6.71, 6.70, 5.99, 5.95, 3.92, 2.93, 2.92, 2.92, 2.92, 2.90, 2.49, 2.48, 2.47, 2.46, 2.33, 2.33, 2.32, 1.96, 1.95, 1.94, 1.94, 1.93, 1.93, 1.92, 1.91, 1.20, 1.15, 1.15, 1.14, 1.14, 1.13, 0.71, 0.70, 0.69.

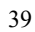

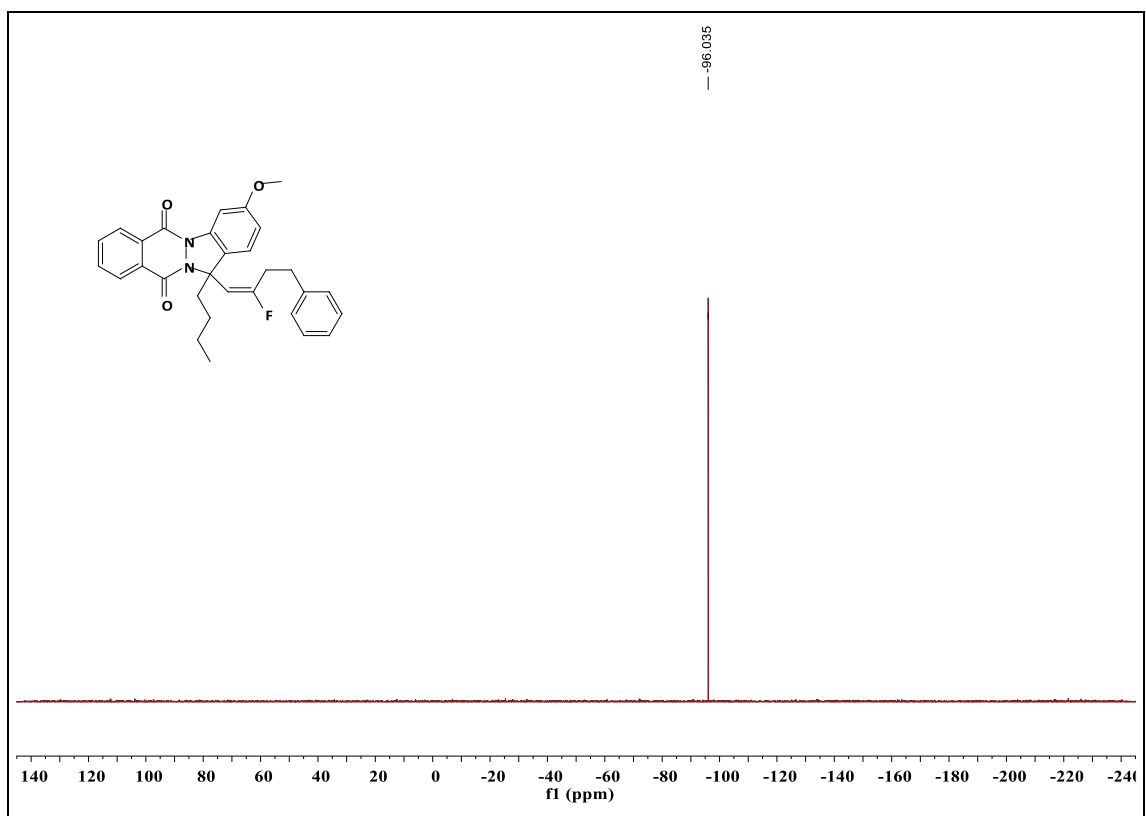

**(*E*)-13-butyl-13-(2-fluoro-4-phenylbut-1-en-1-yl)-2-(trifluoromethyl)-13*H*-indazolo[1,2-*b*]phthalazine-6,11-dione (3l)**

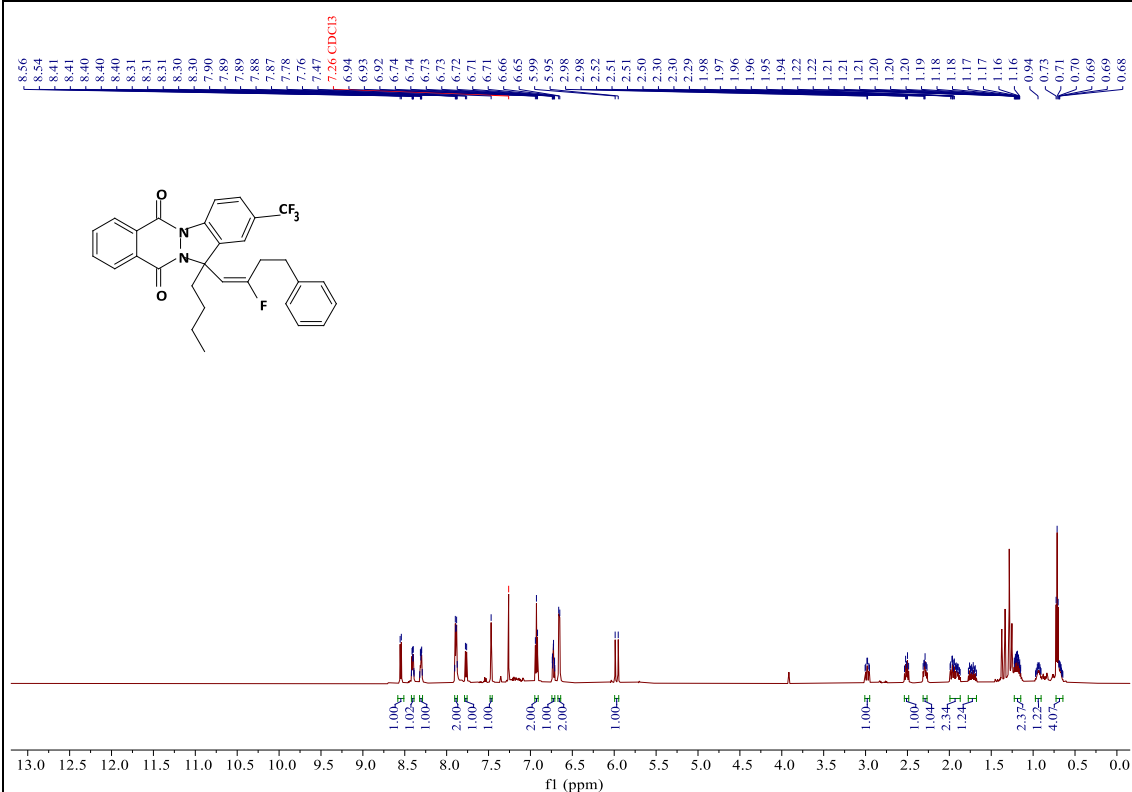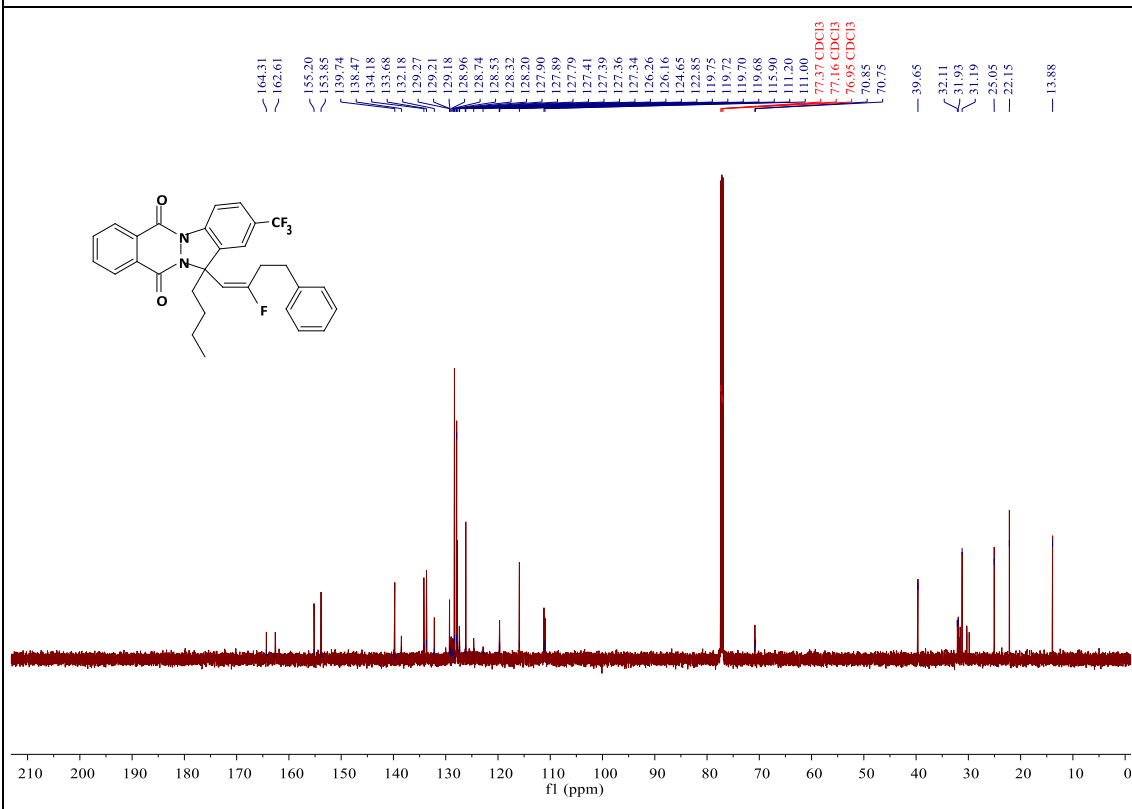

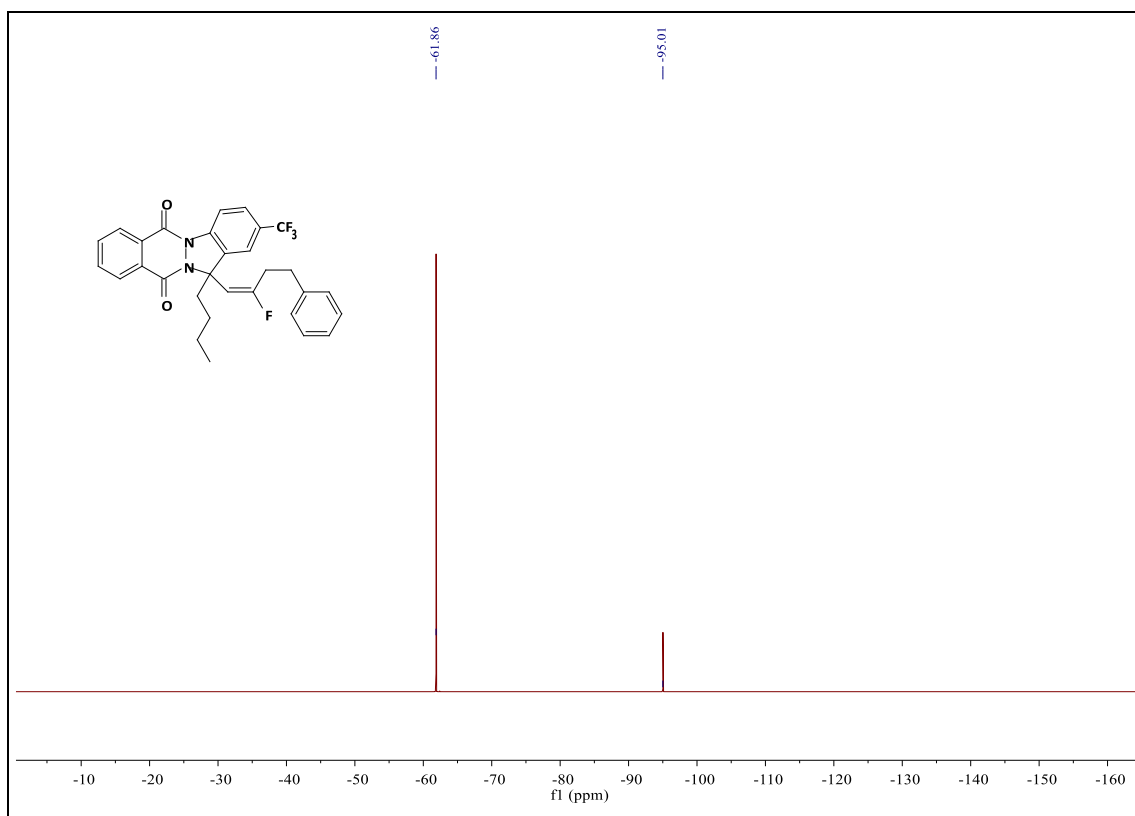

**(*E*)-13-butyl-8,9-difluoro-13-(2-fluoro-4-phenylbut-1-en-1-yl)-13*H*-indazolo[1,2-*b*]phthalazine-6,11-dione (3m)**

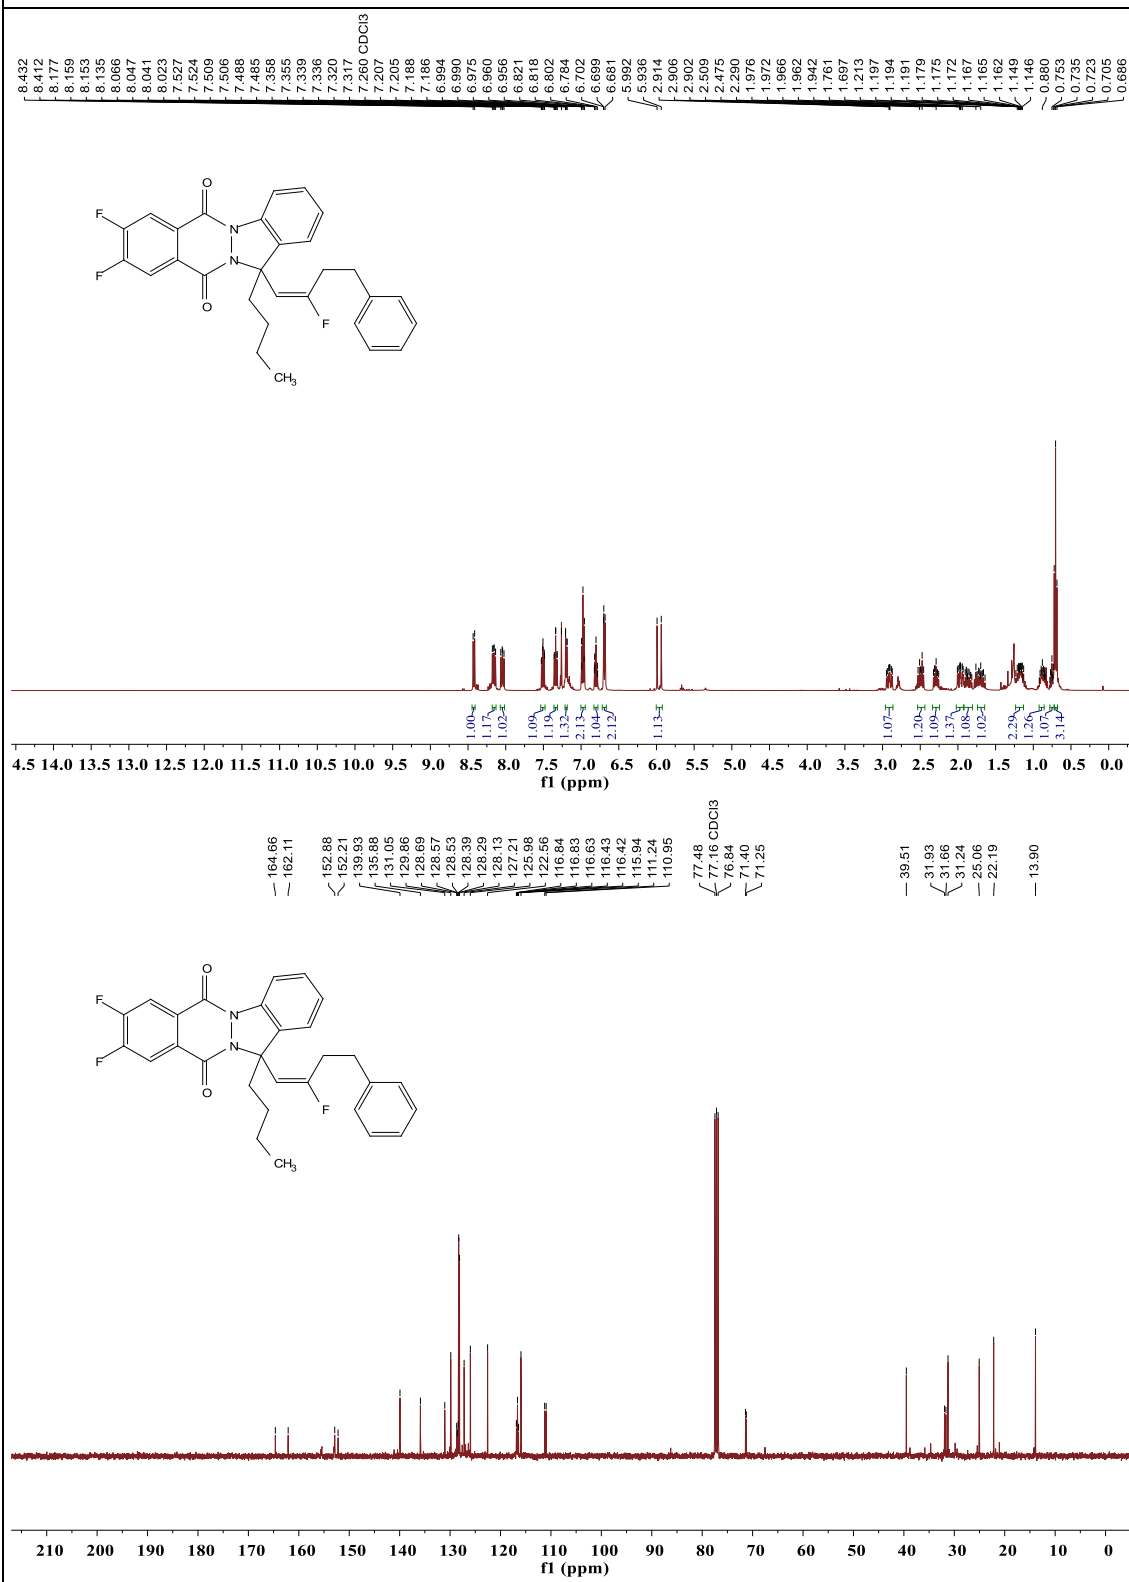

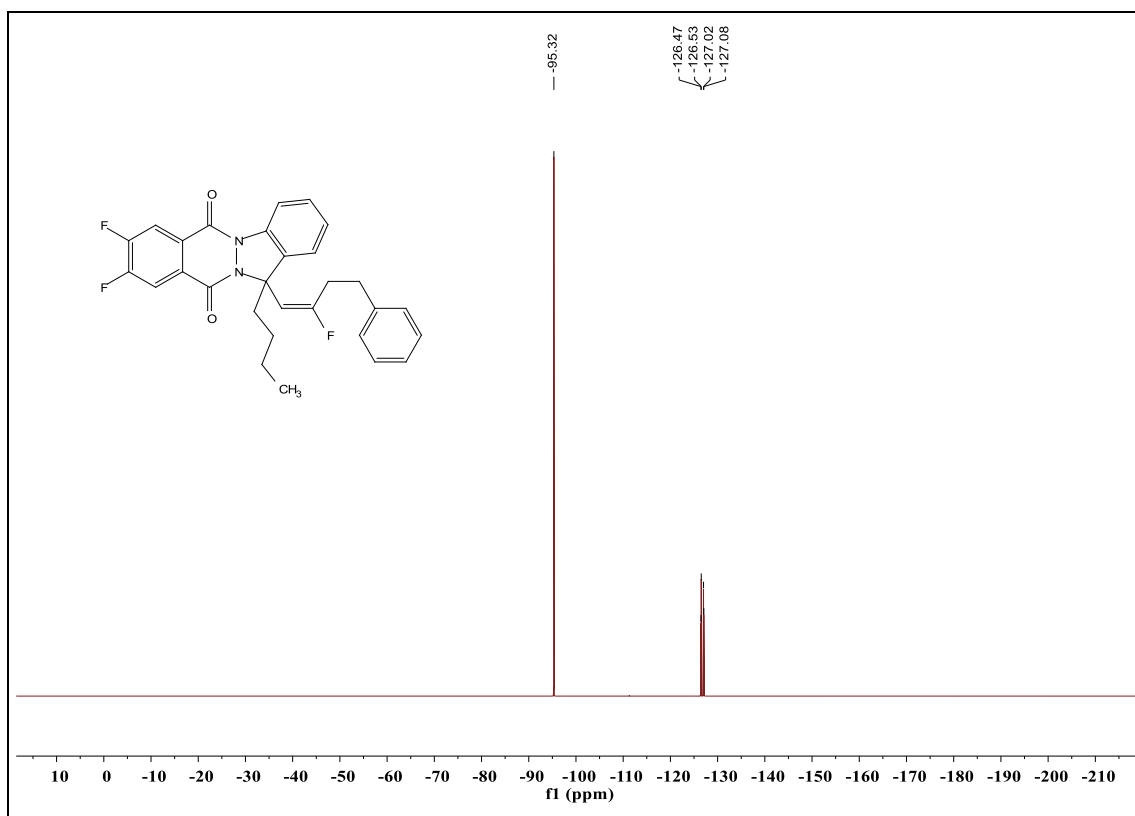



**(*E*)-13-butyl-8,9-dichloro-13-(2-fluoro-4-phenylbut-1-en-1-yl)-13H-indazolo[1,2-*b*]phthalazine-6,11-dione (3n)**

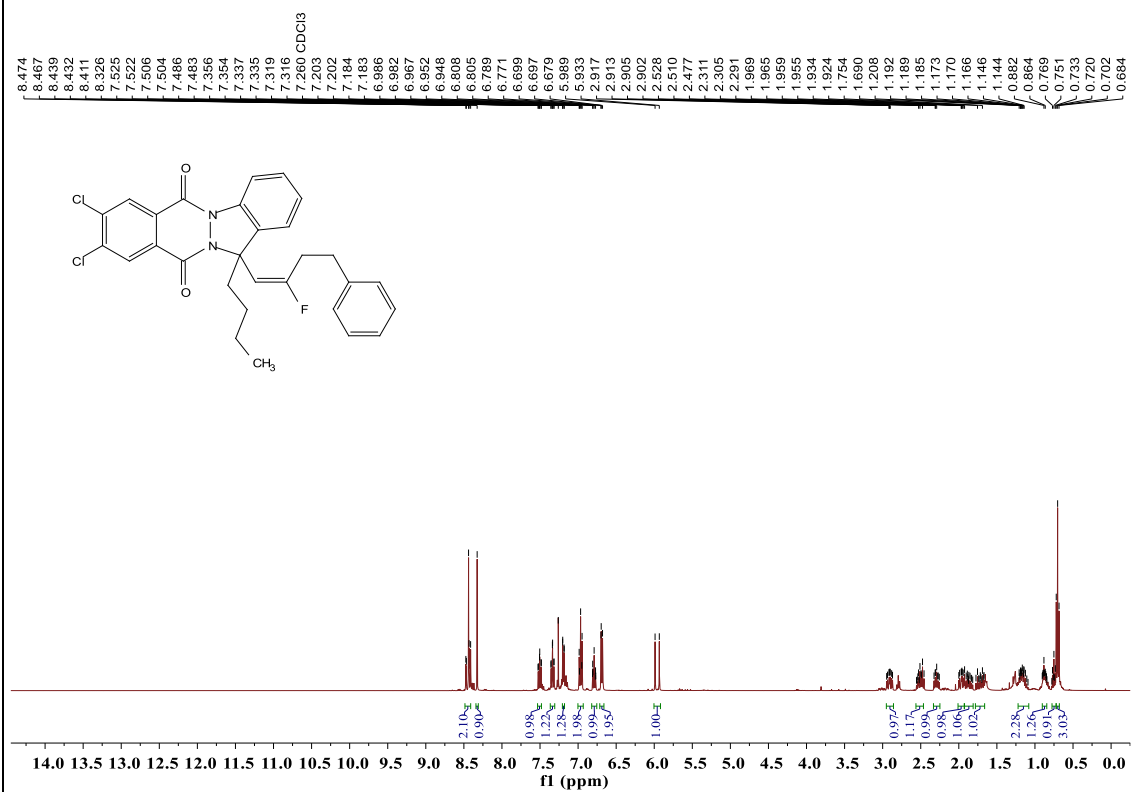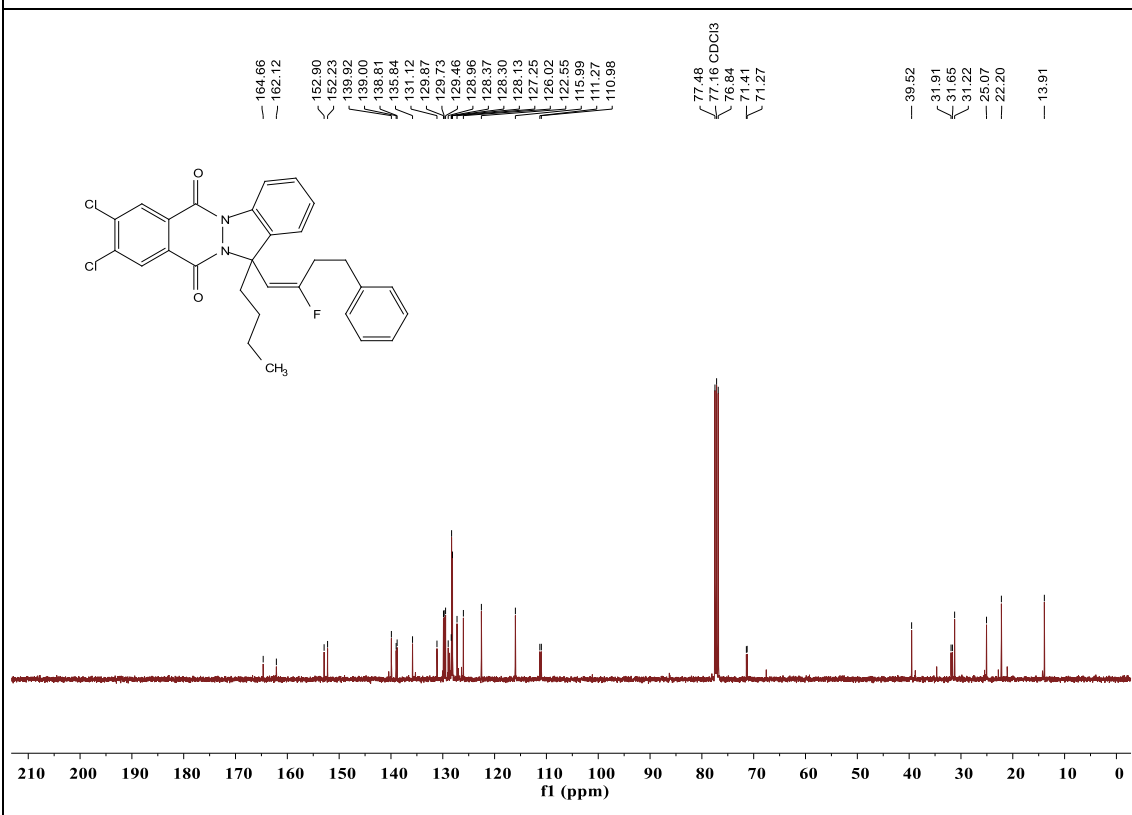

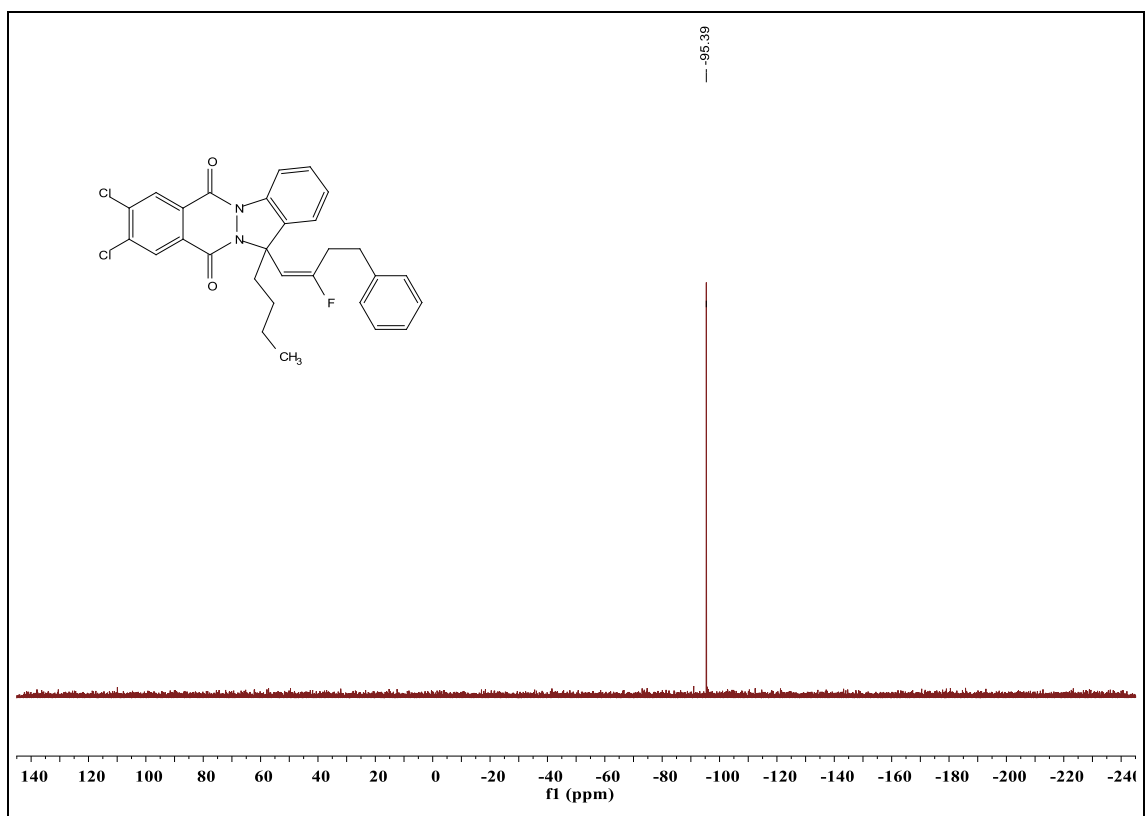

**(E)-13-butyl-13-(2-fluoro-4-phenylbut-1-en-1-yl)-8,9-dimethoxy-13H-indazolo[1,2-*b*]phthalazine-6,11-dione (3o)**

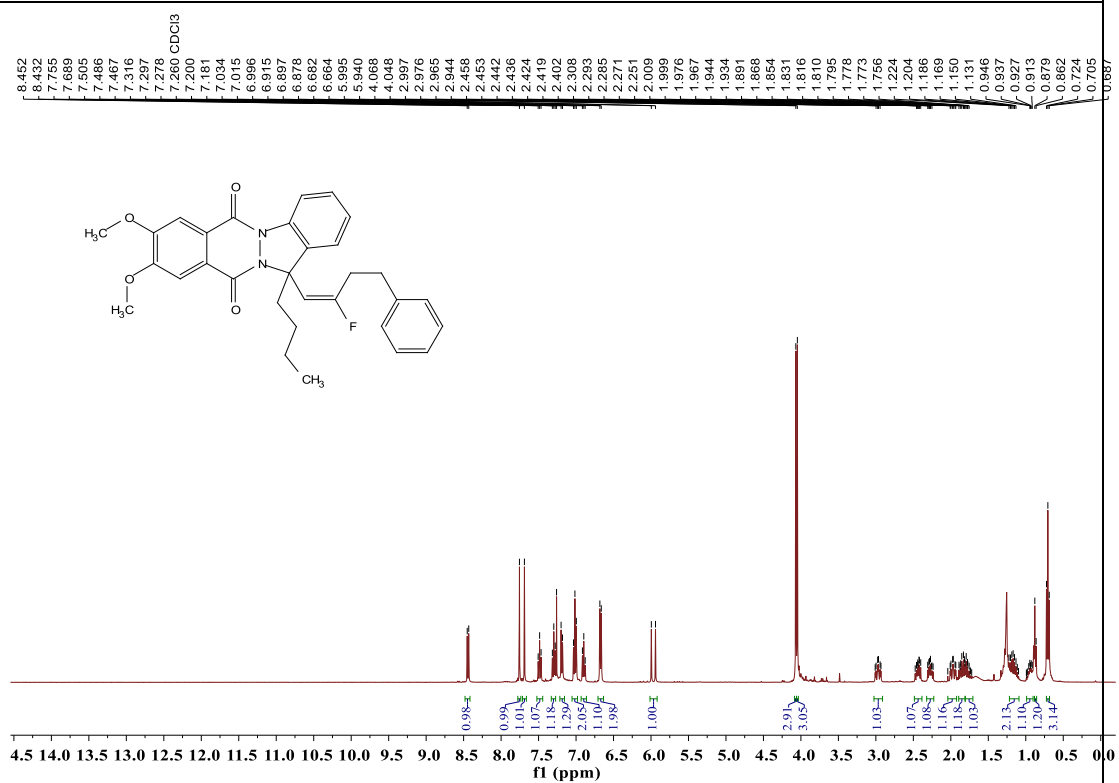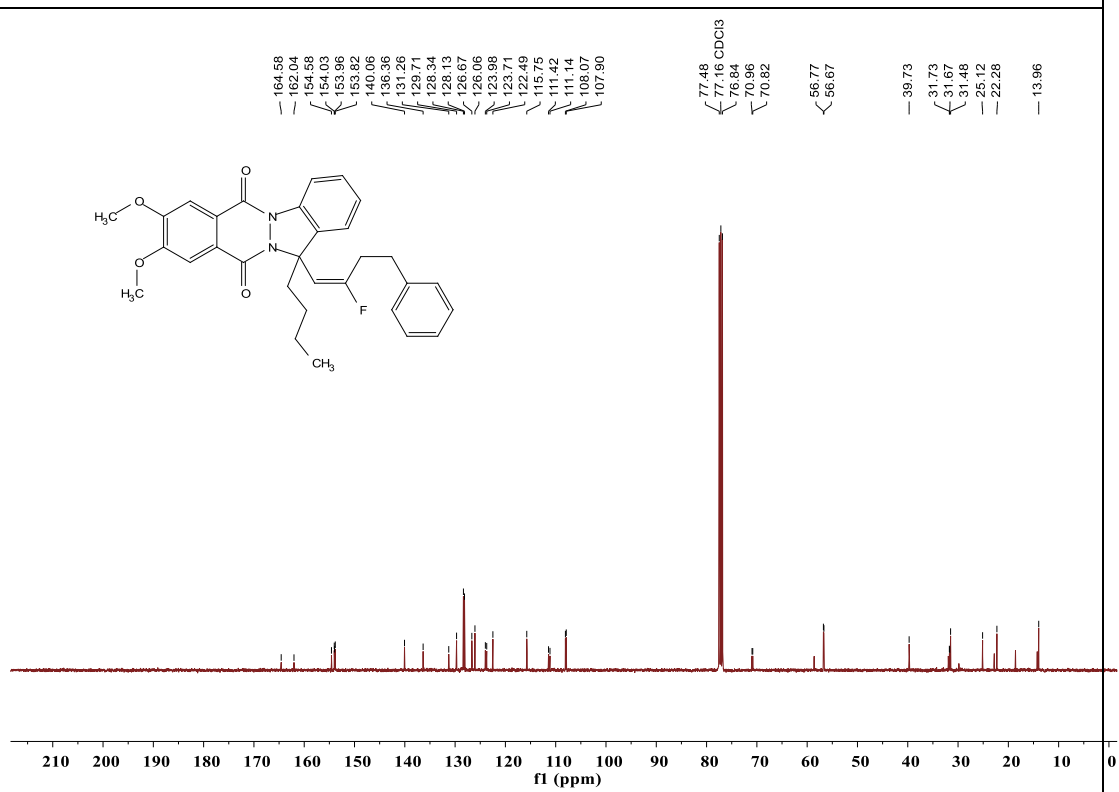

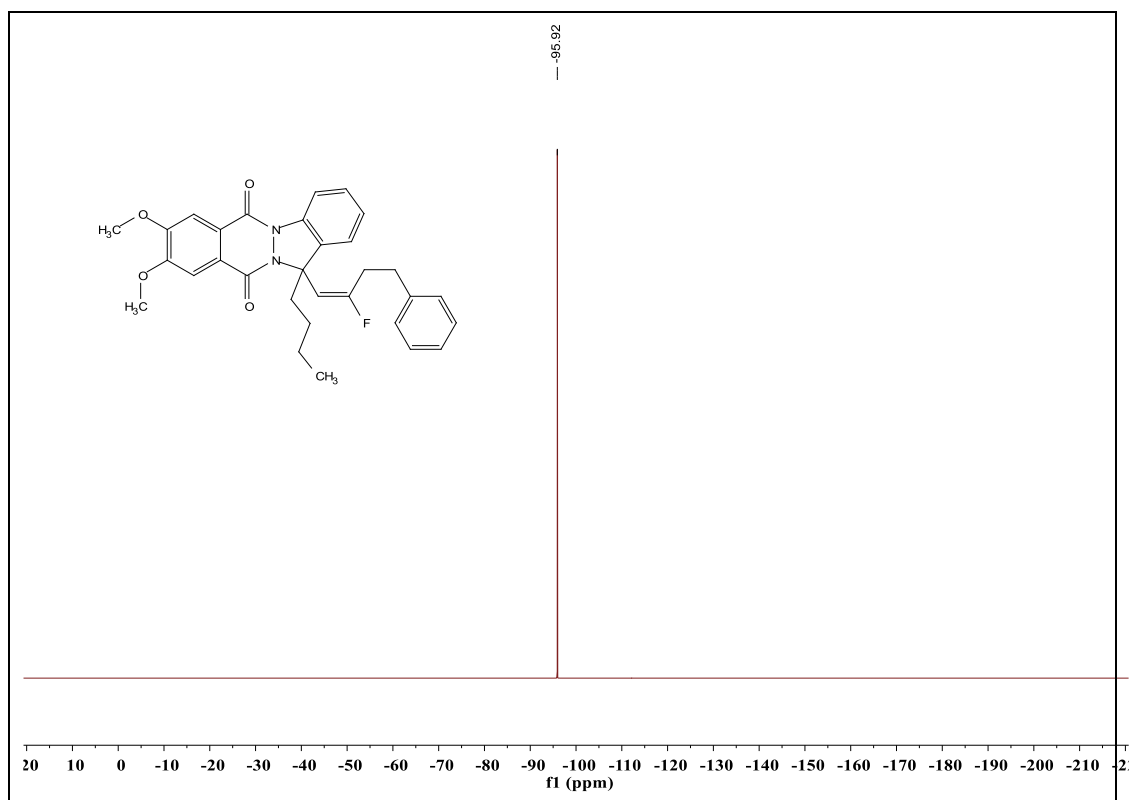

**(E)-11-butyl-11-(2-fluoro-4-phenylbut-1-en-1-yl)-11H-pyridazino[1,2-a]indazole-6,9-dione (3p)**

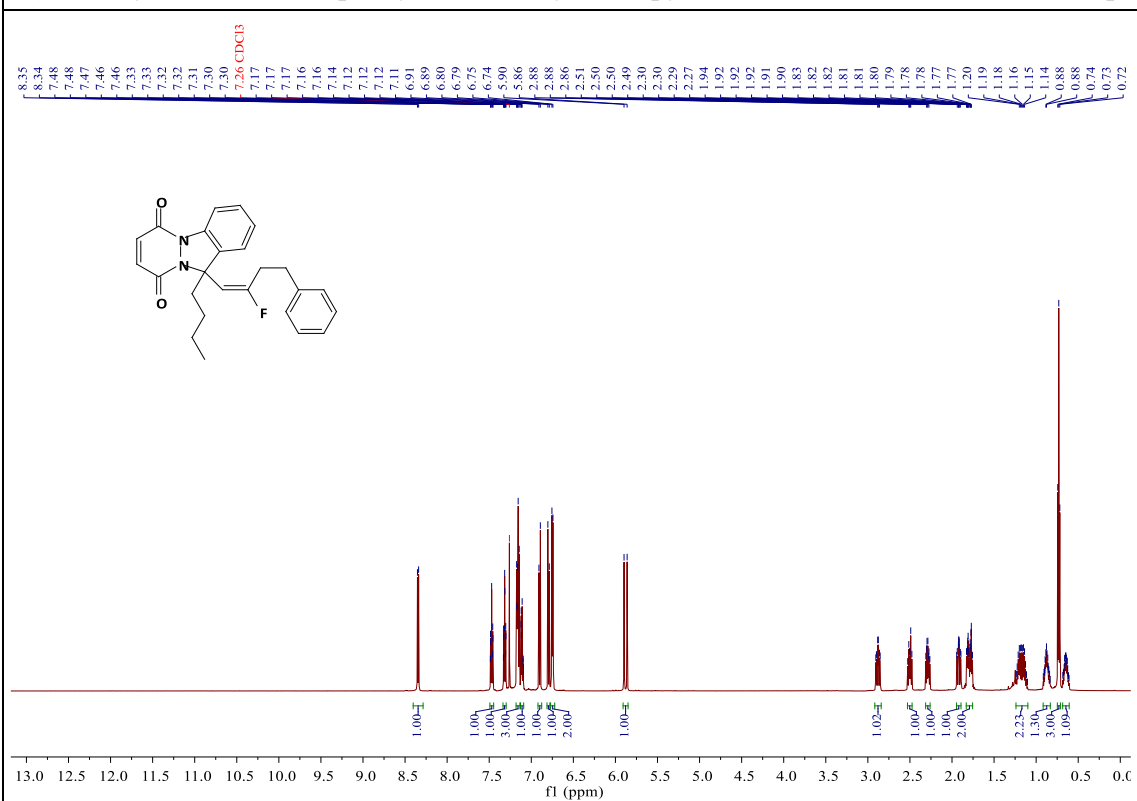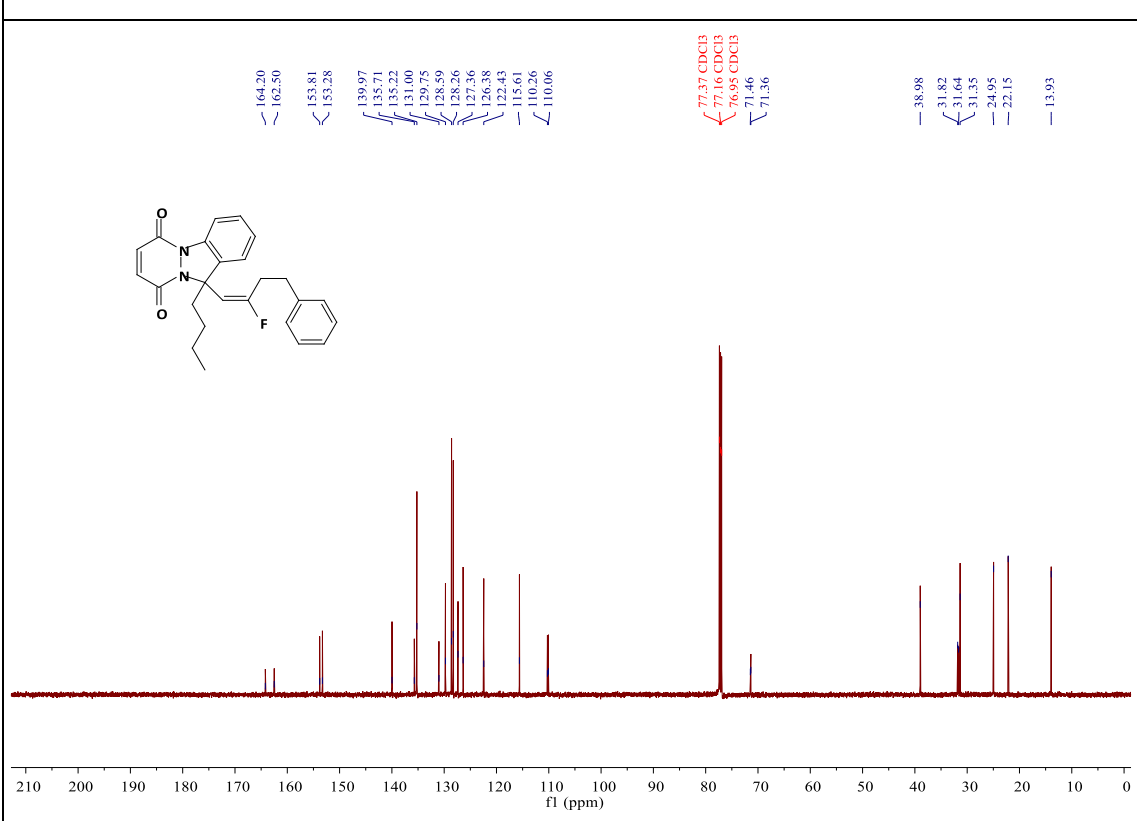

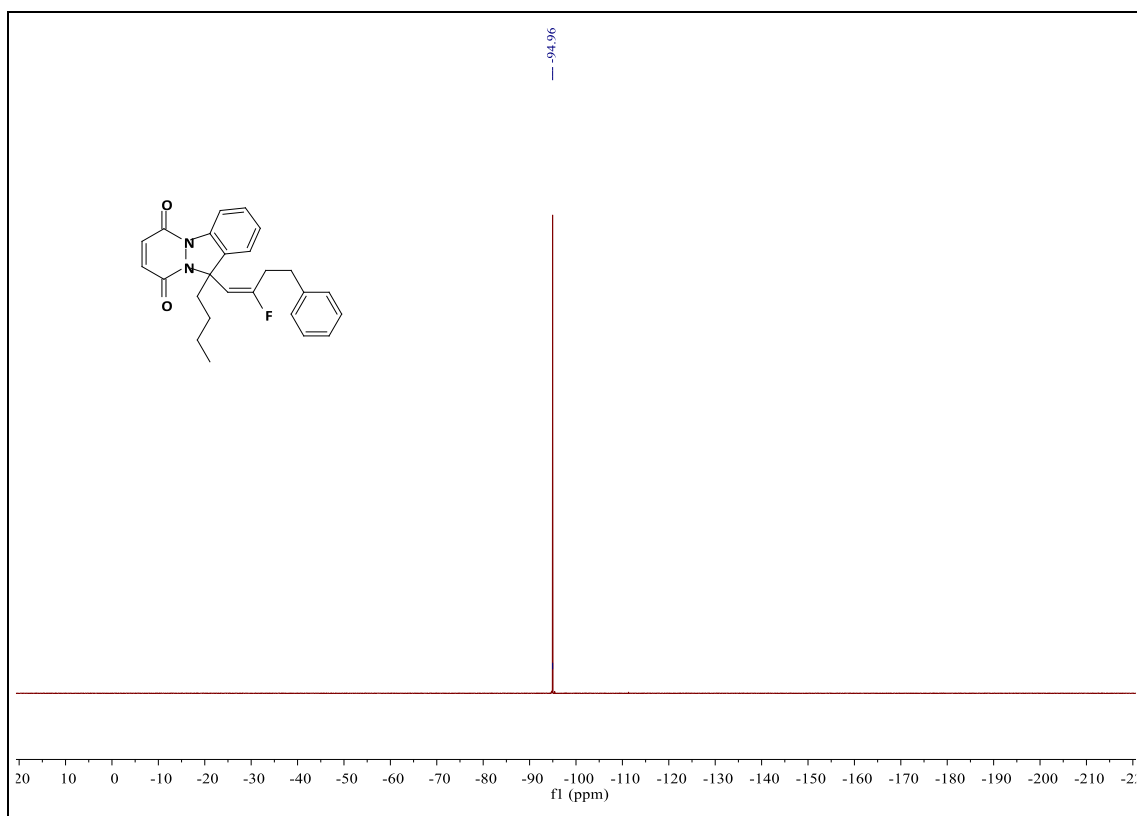

**(*E*)-7-butyl-7-(2-fluoro-4-phenylbut-1-en-1-yl)-12-phenylisoindolo[2,1-*b*]isoquinolin-5(7*H*)-one (3q)**

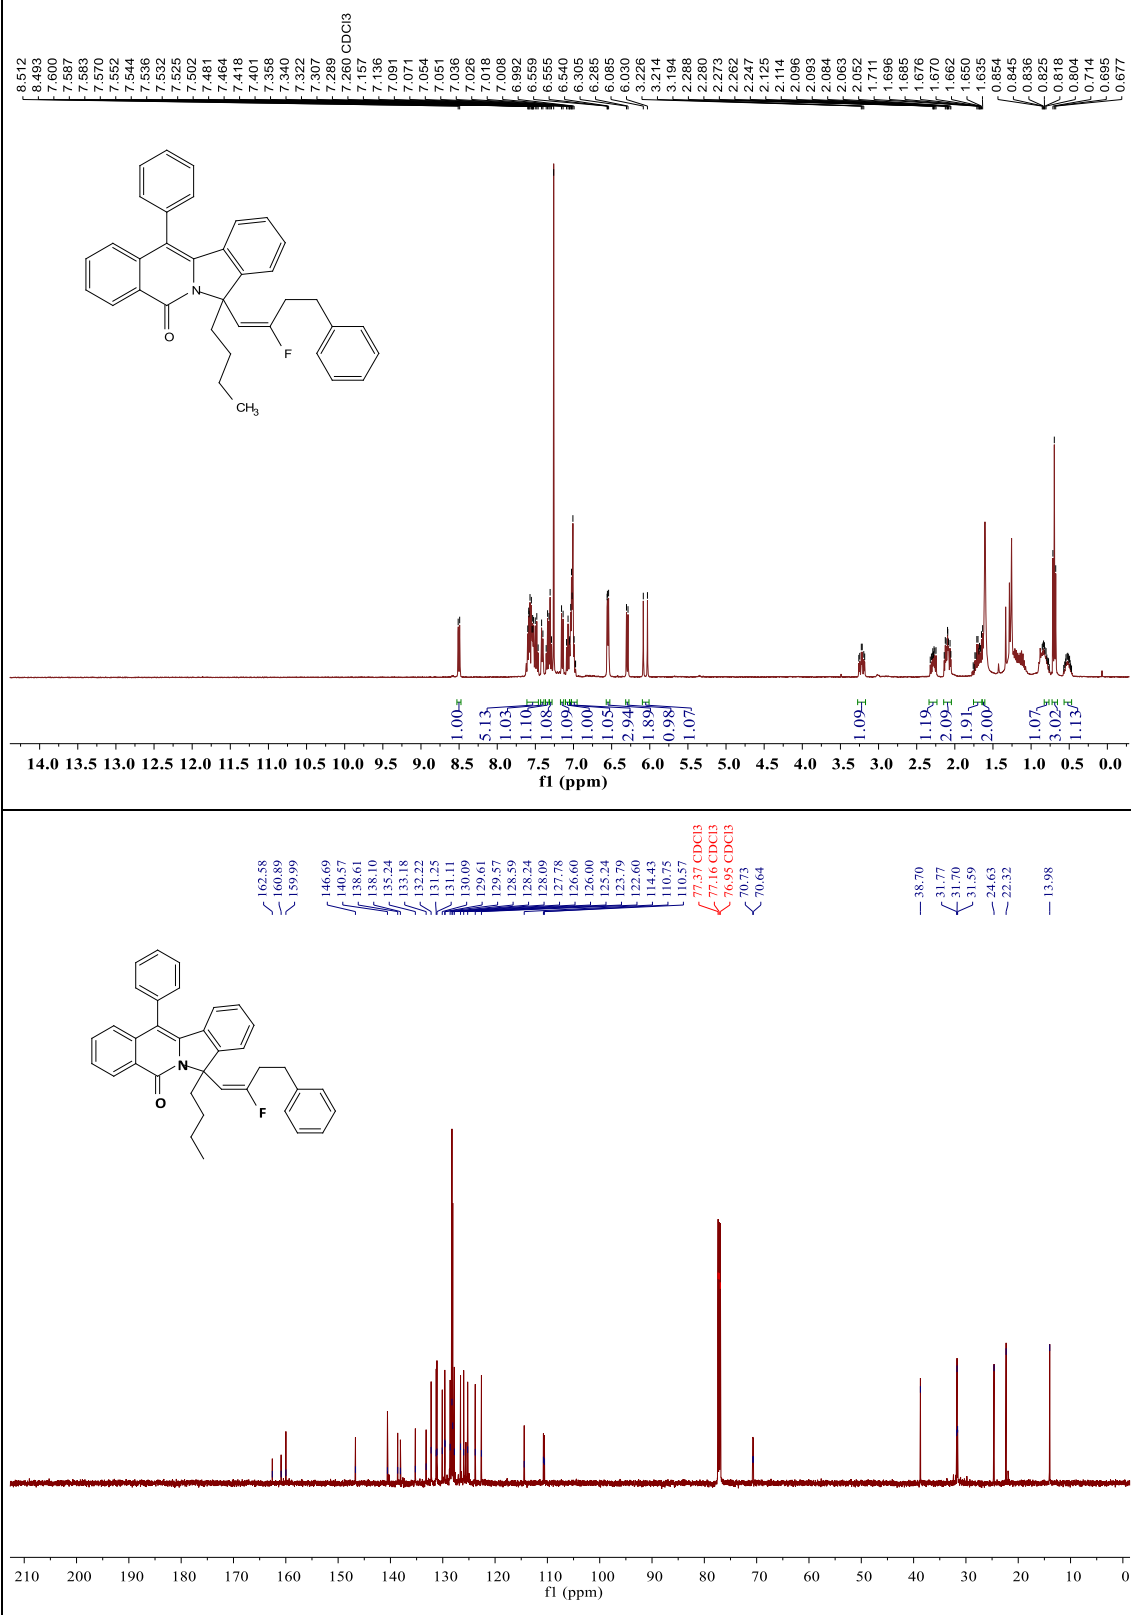

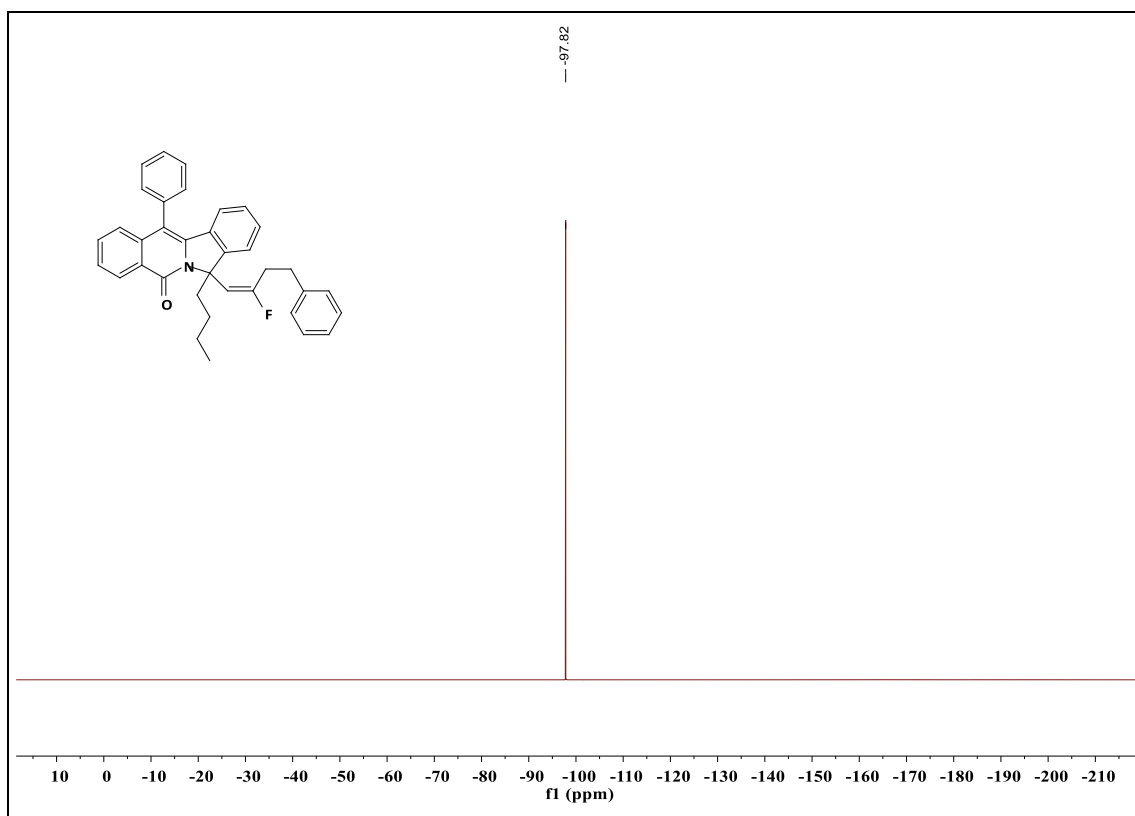



**(*E*)-13-(2-fluoro-4-phenylbut-1-en-1-yl)-13-phenethyl-13*H*-indazolo[1,2-*b*]phthalazine-6,11-dione (3r)**

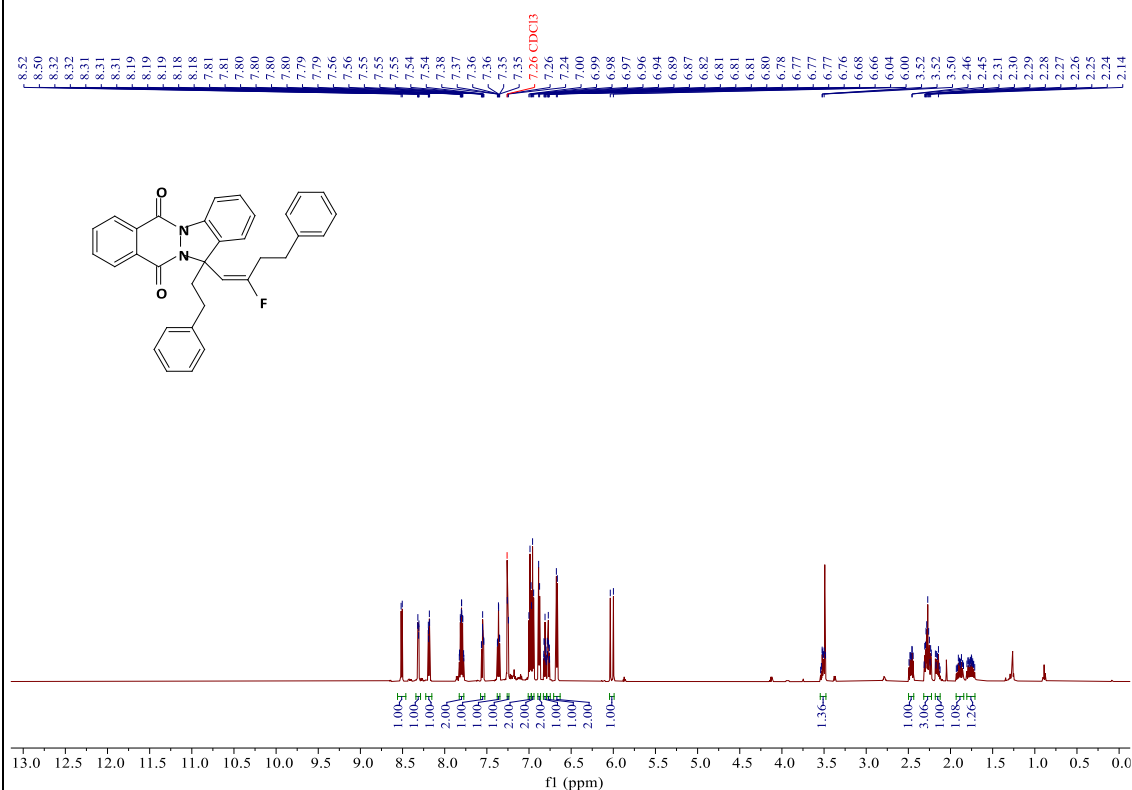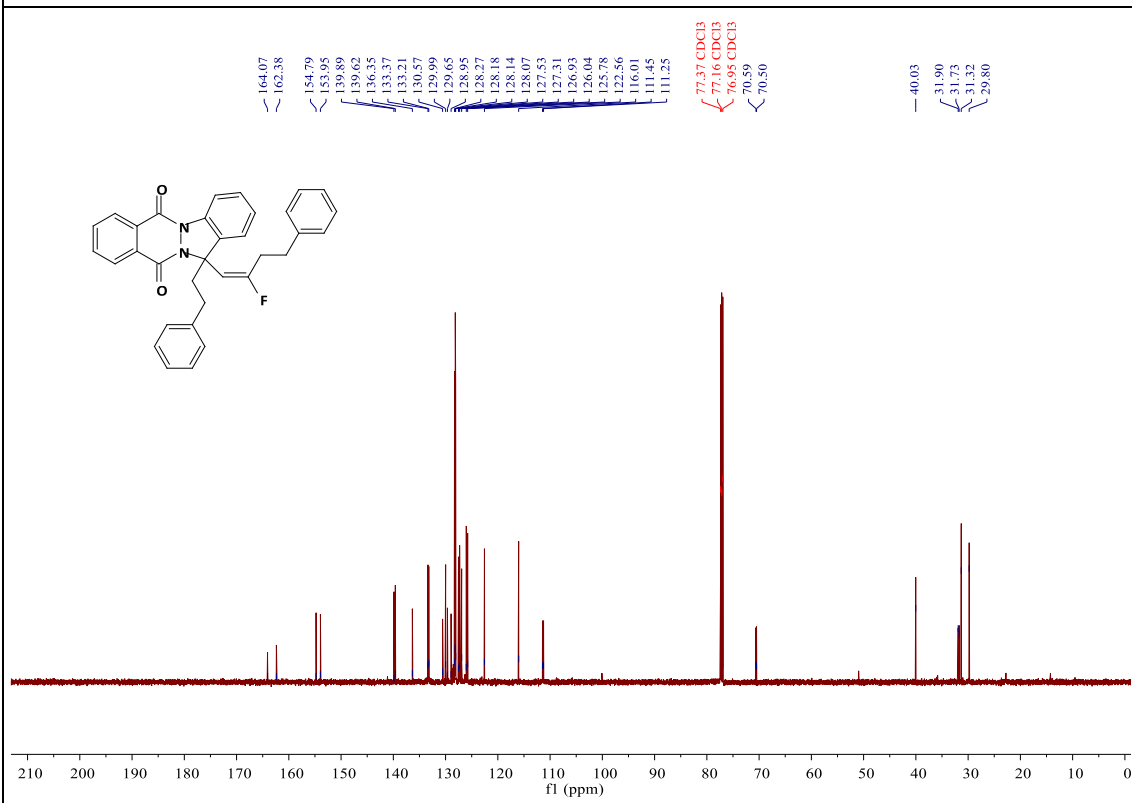

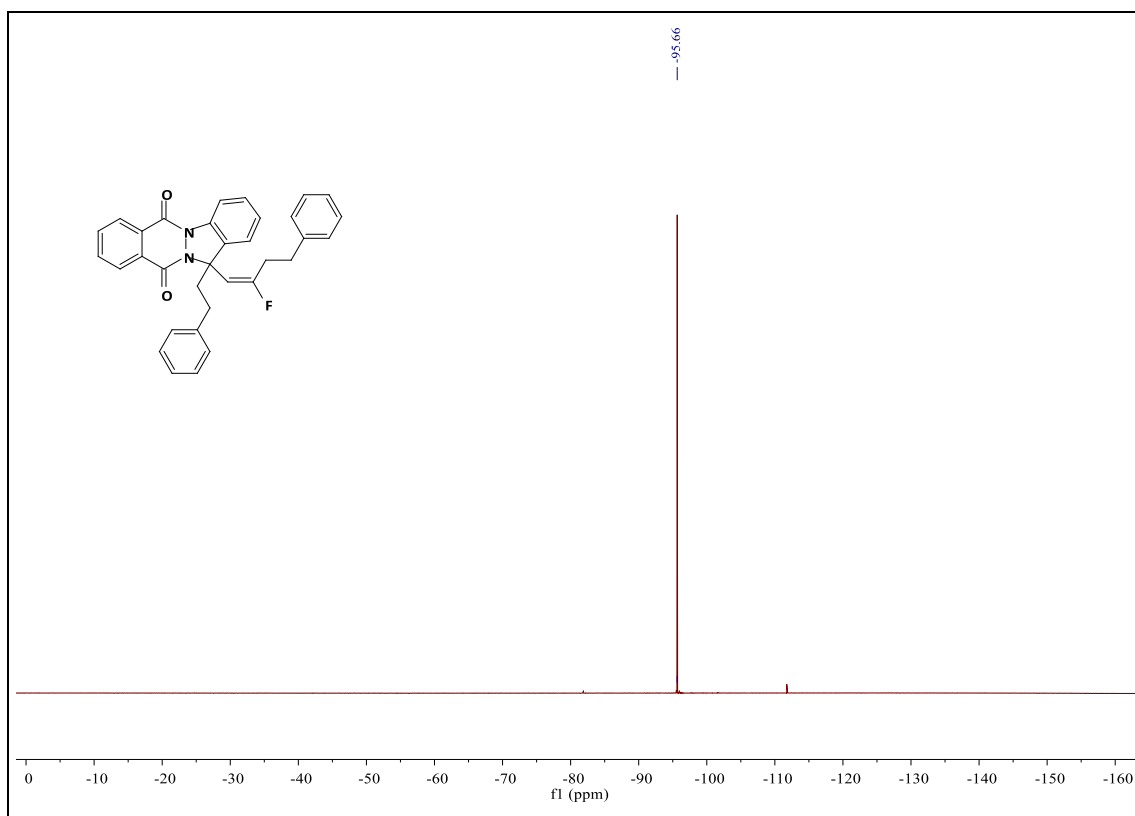

**(*E*)-13-((benzyloxy)methyl)-13-(2-fluoro-4-phenylbut-1-en-1-yl)-13*H*-indazolo[1,2-*b*]phthalazine-6,11-dione (3s)**

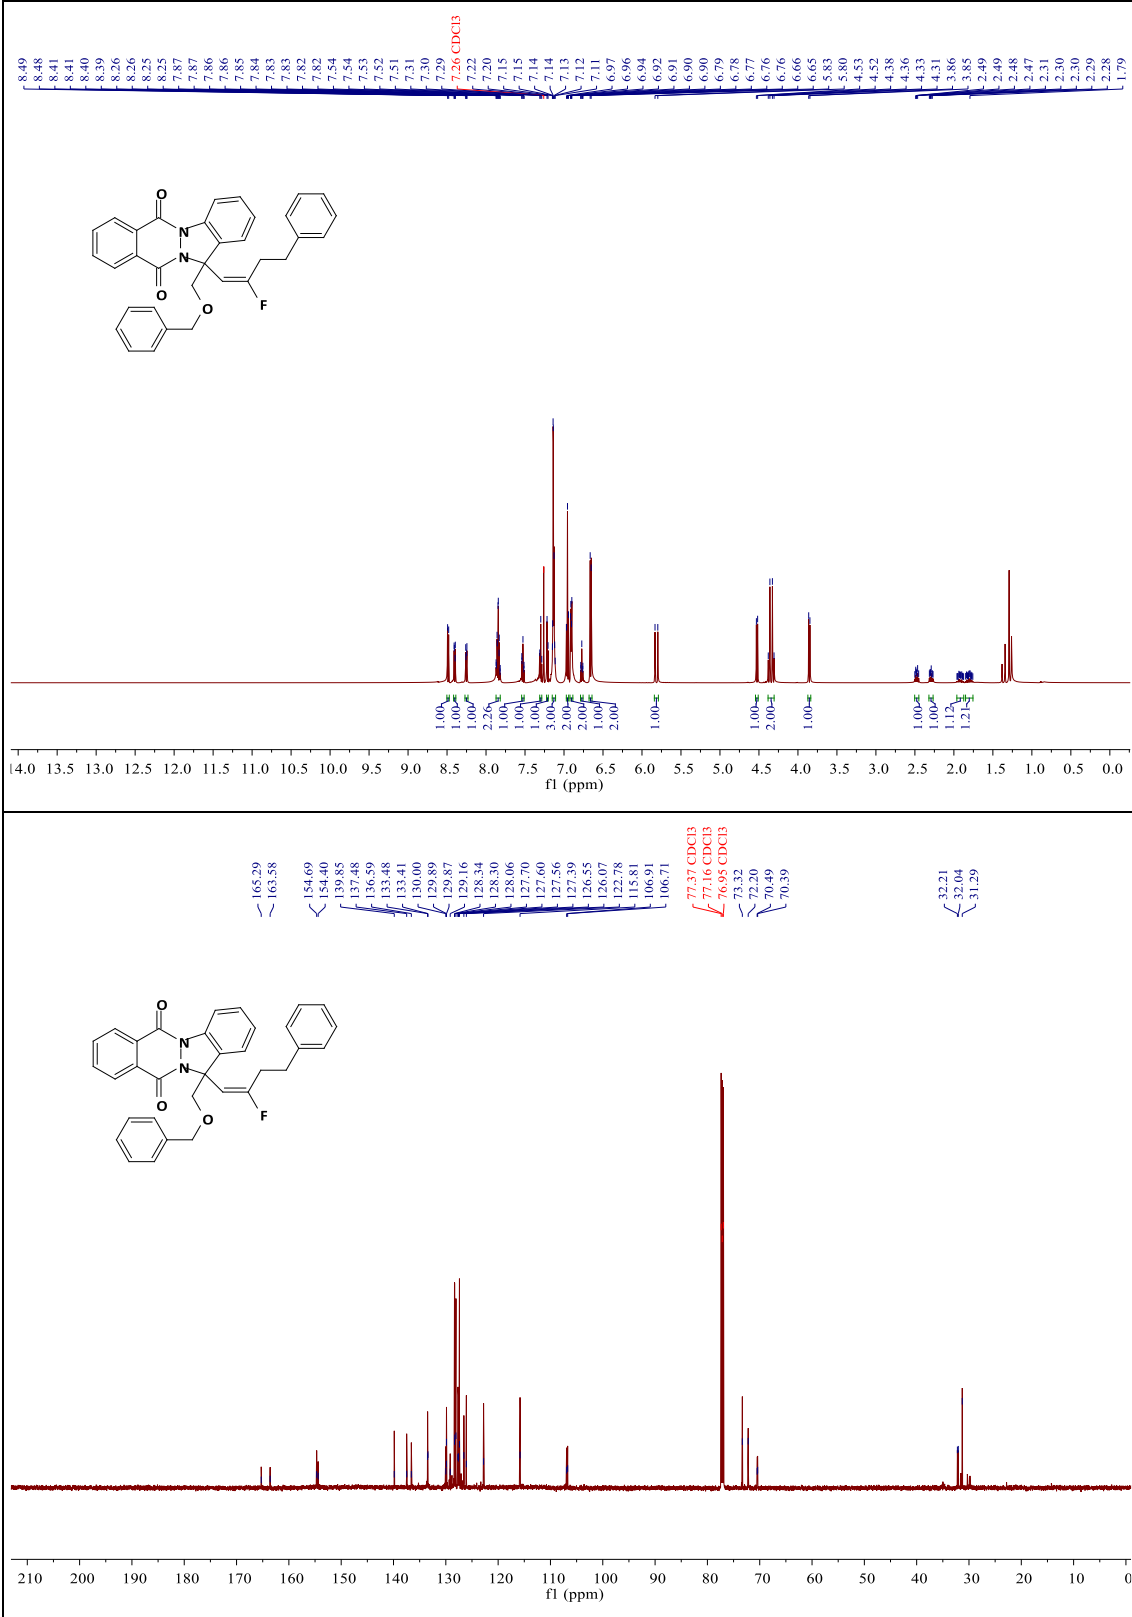

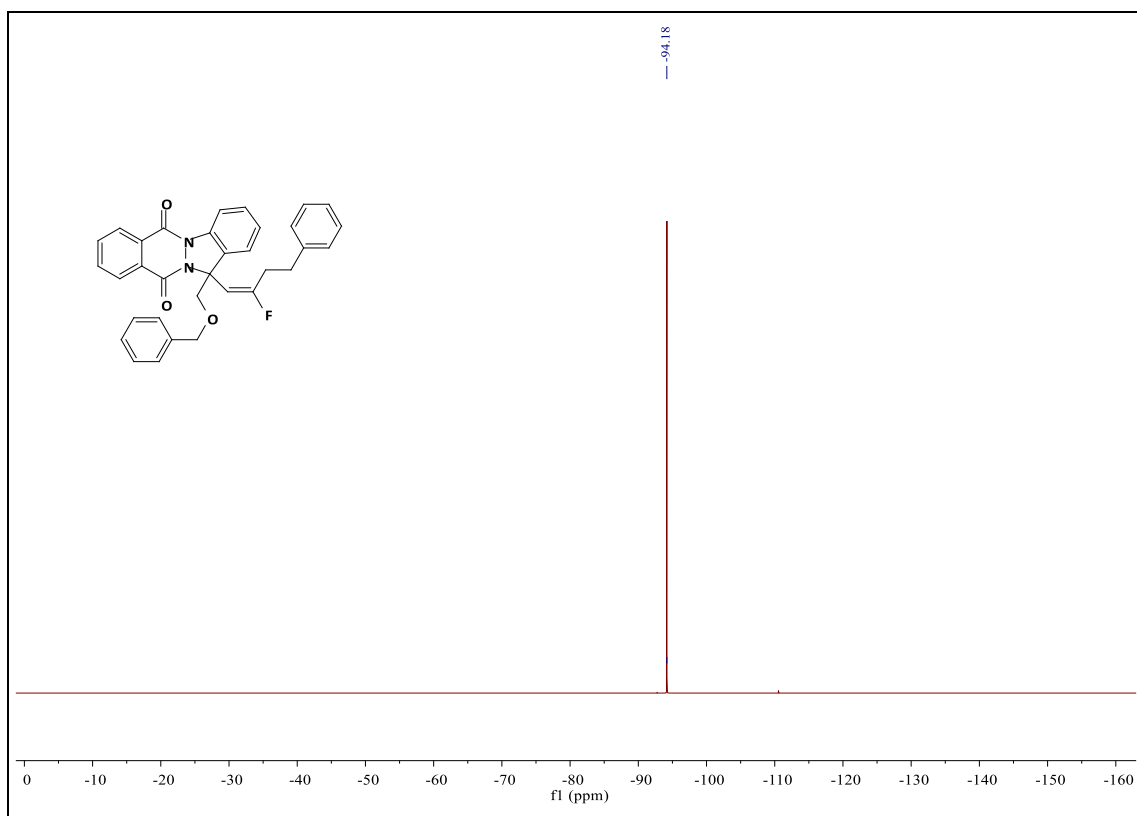

**(*E*)-13-(2-fluoro-4-phenylbut-1-en-1-yl)-13-(3-hydroxypropyl)-13*H*-indazolo[1,2-*b*]phthalazine-6,11-dione (3t)**

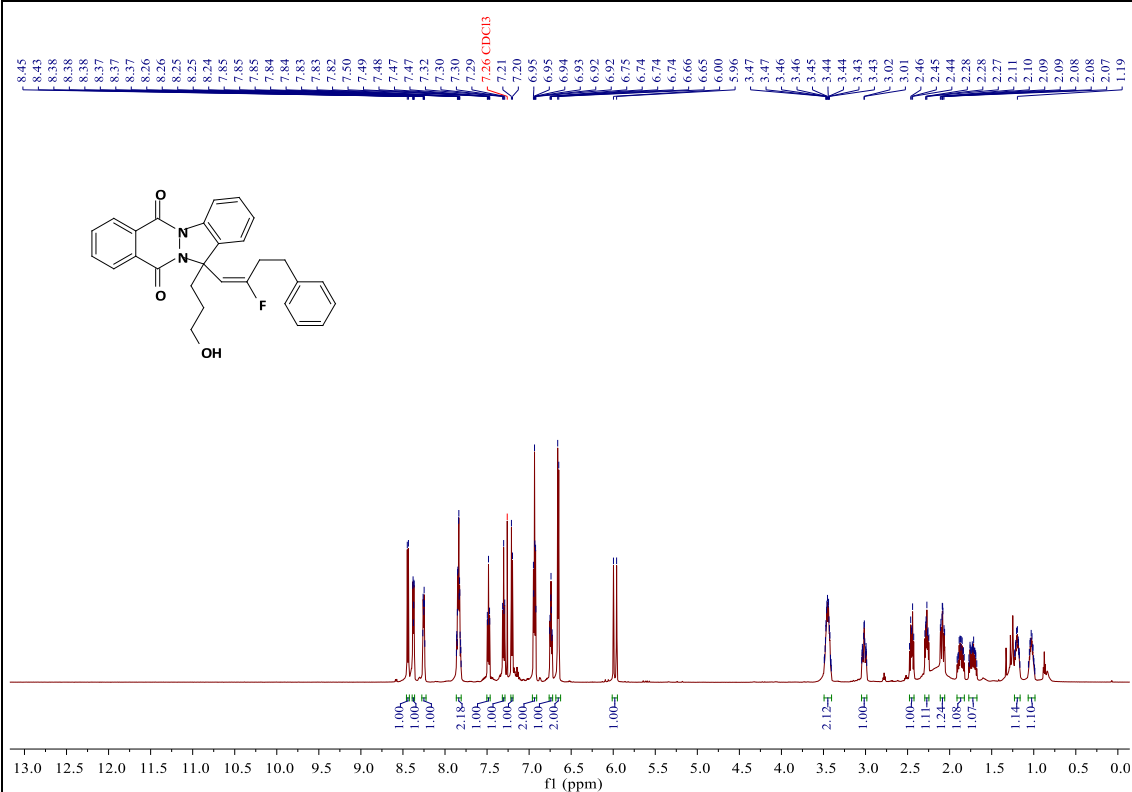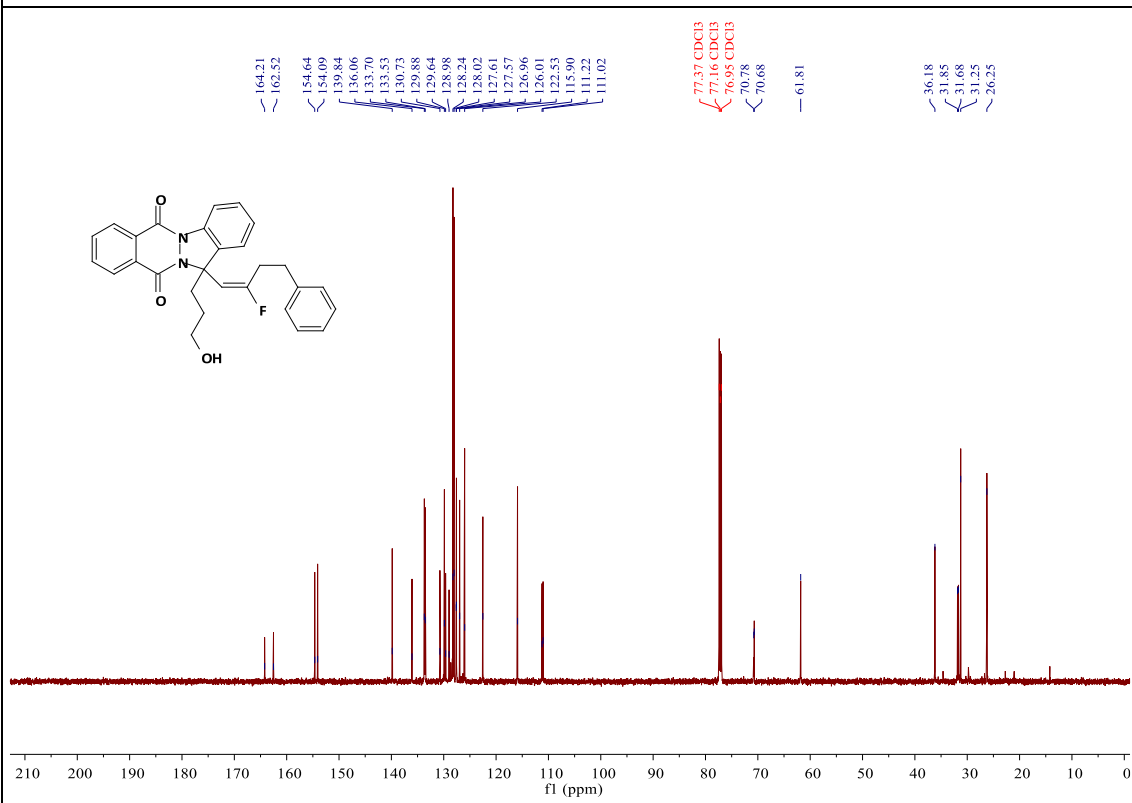

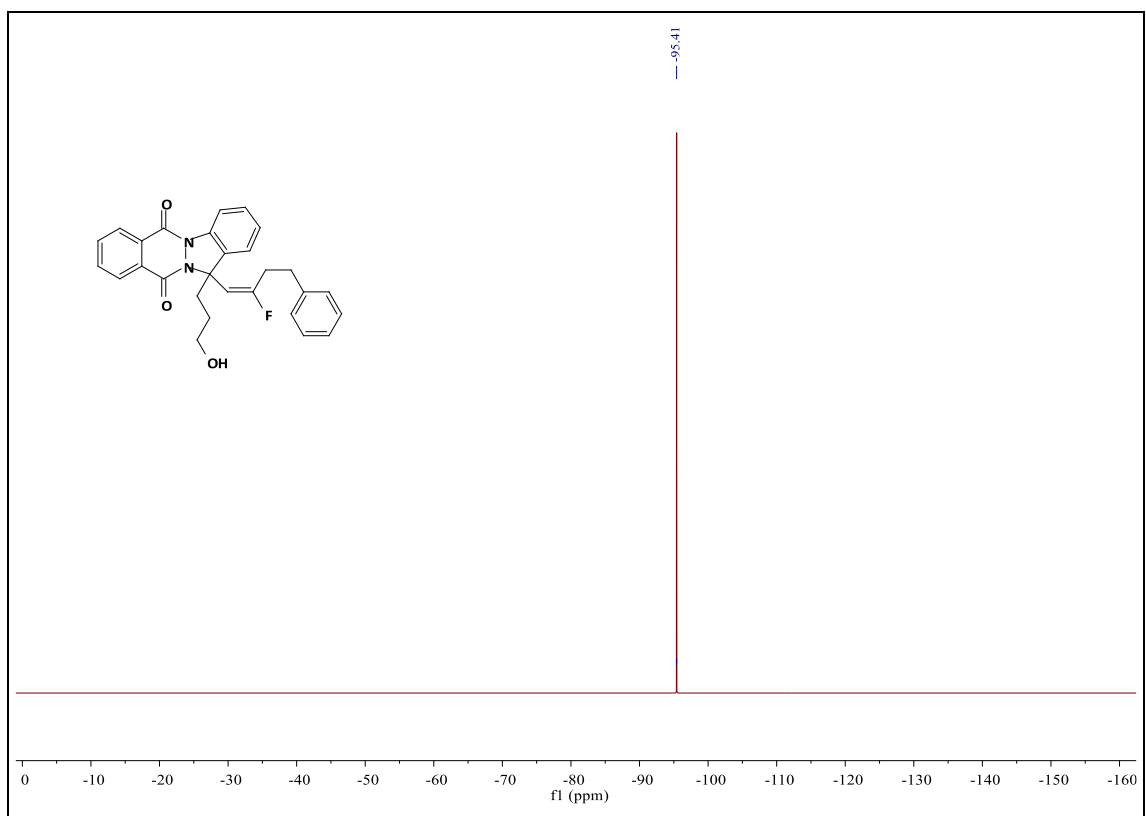

**(*E*)-13-(2-fluoro-4-phenylbut-1-en-1-yl)-13-(3-((4-methoxybenzyl)oxy)propyl)-13*H*-indazolo[1,2-*b*]phthalazine-6,11-dione (3u)**

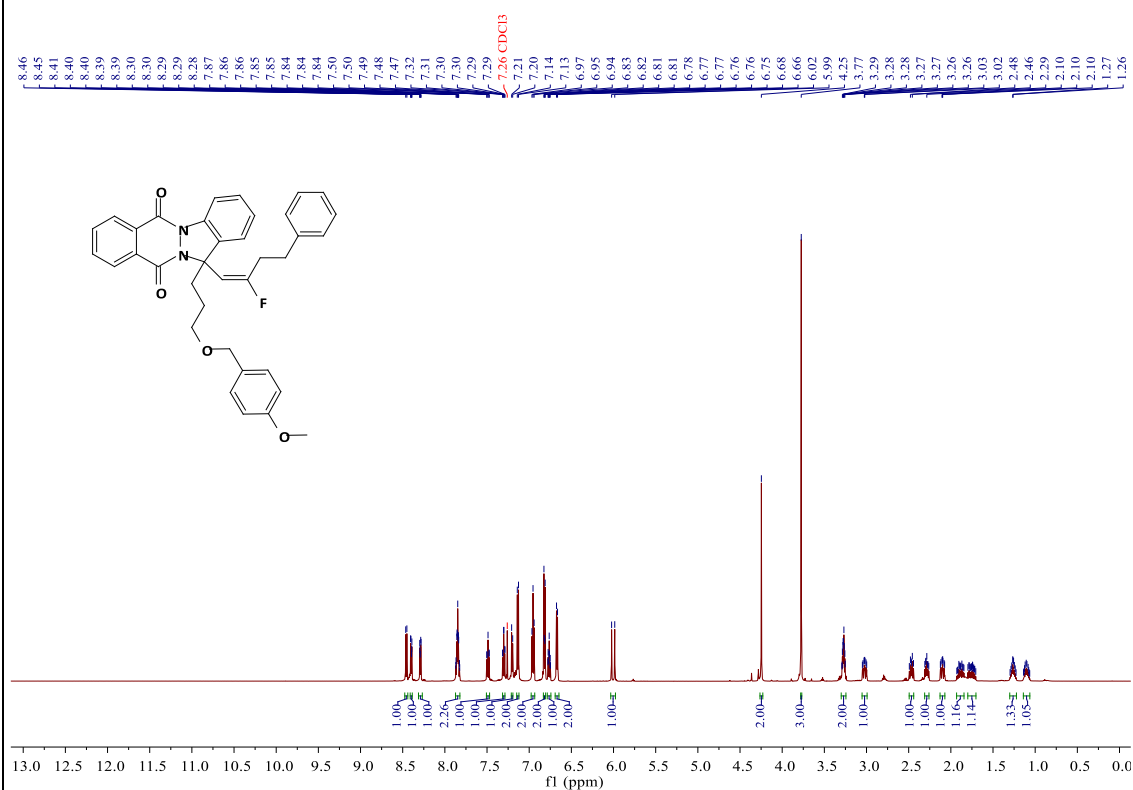

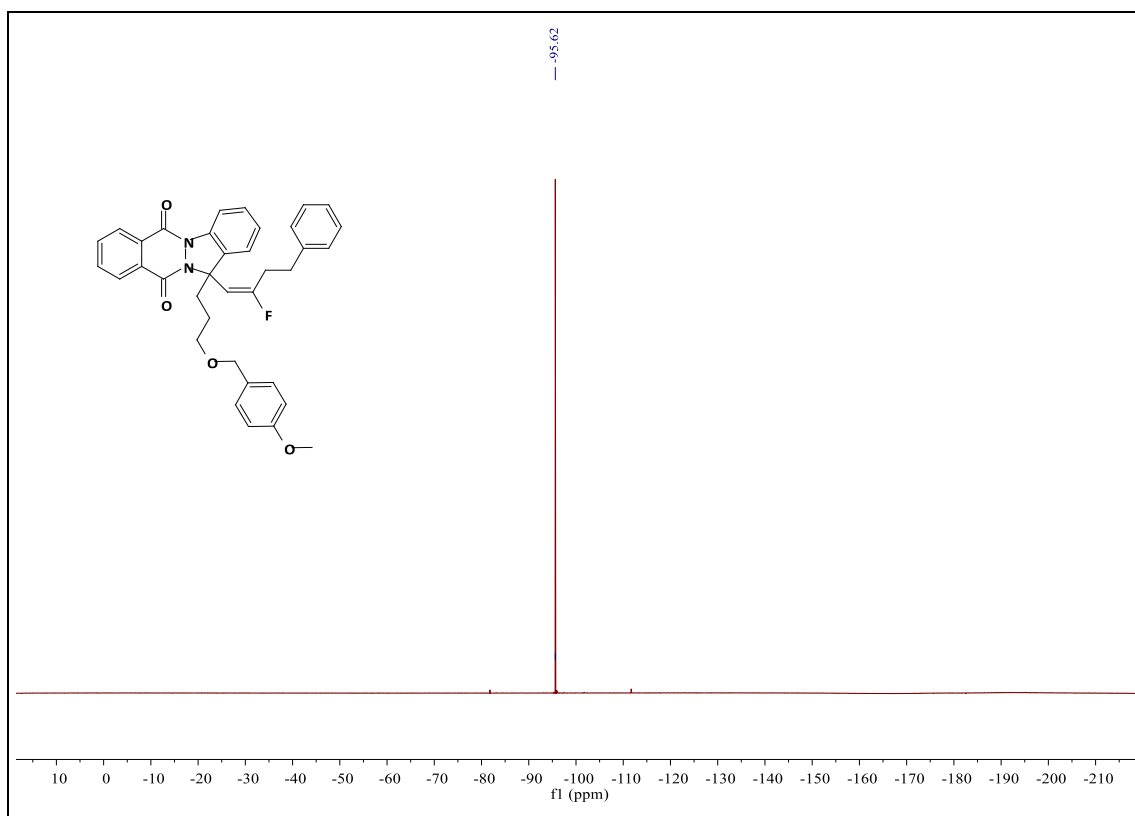



[illegible]

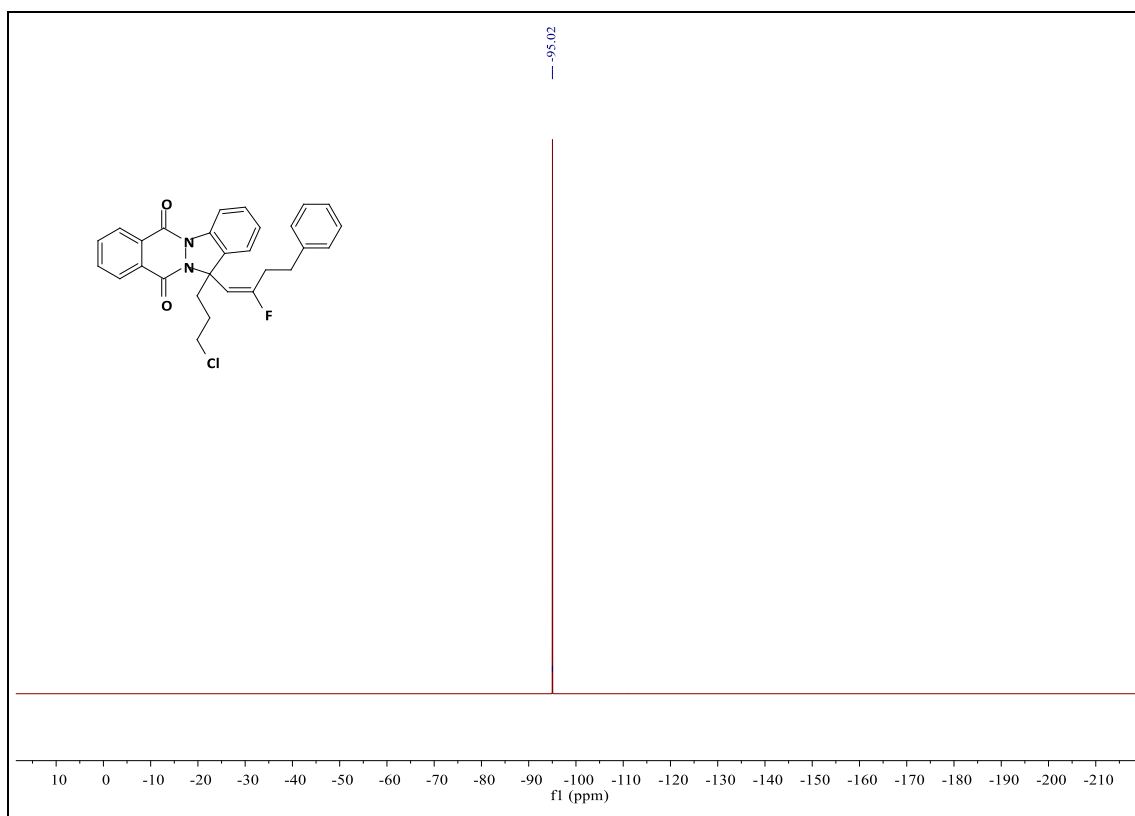

**(*E*)-13-butyl-13-(2-fluorobut-1-en-1-yl)-13*H*-indazolo[1,2-*b*]phthalazine-6,11-dione (3w)**

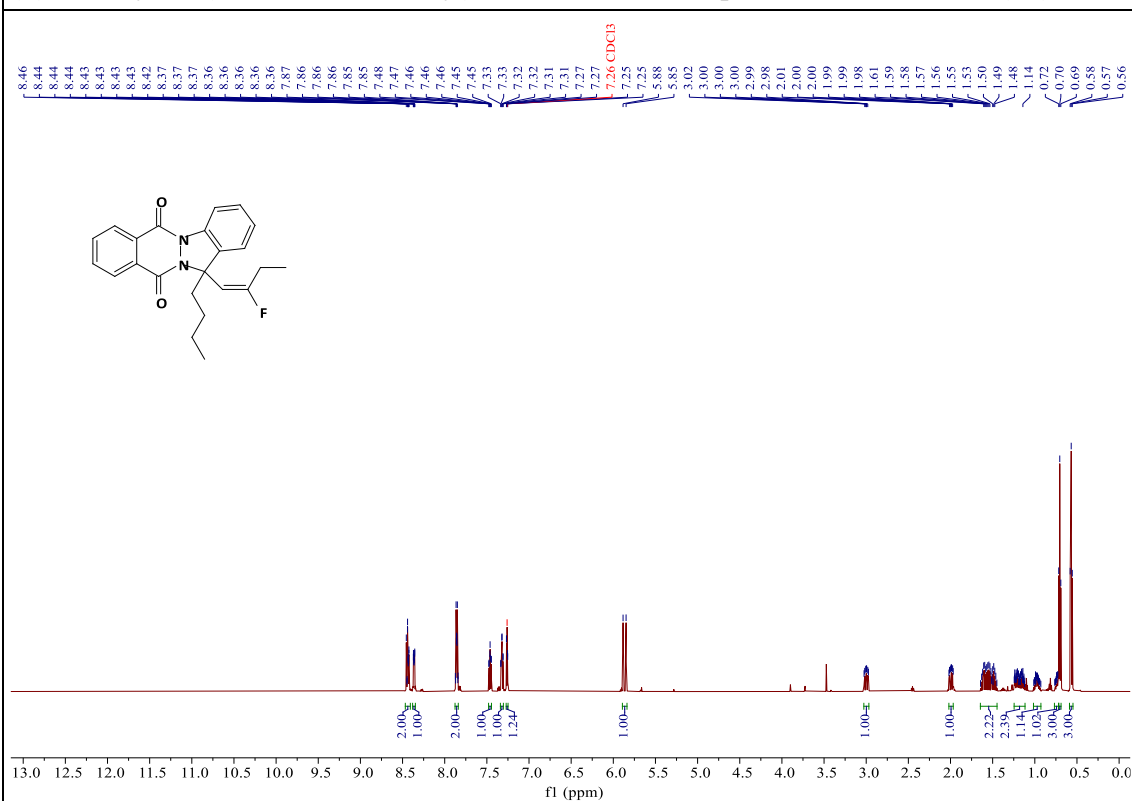

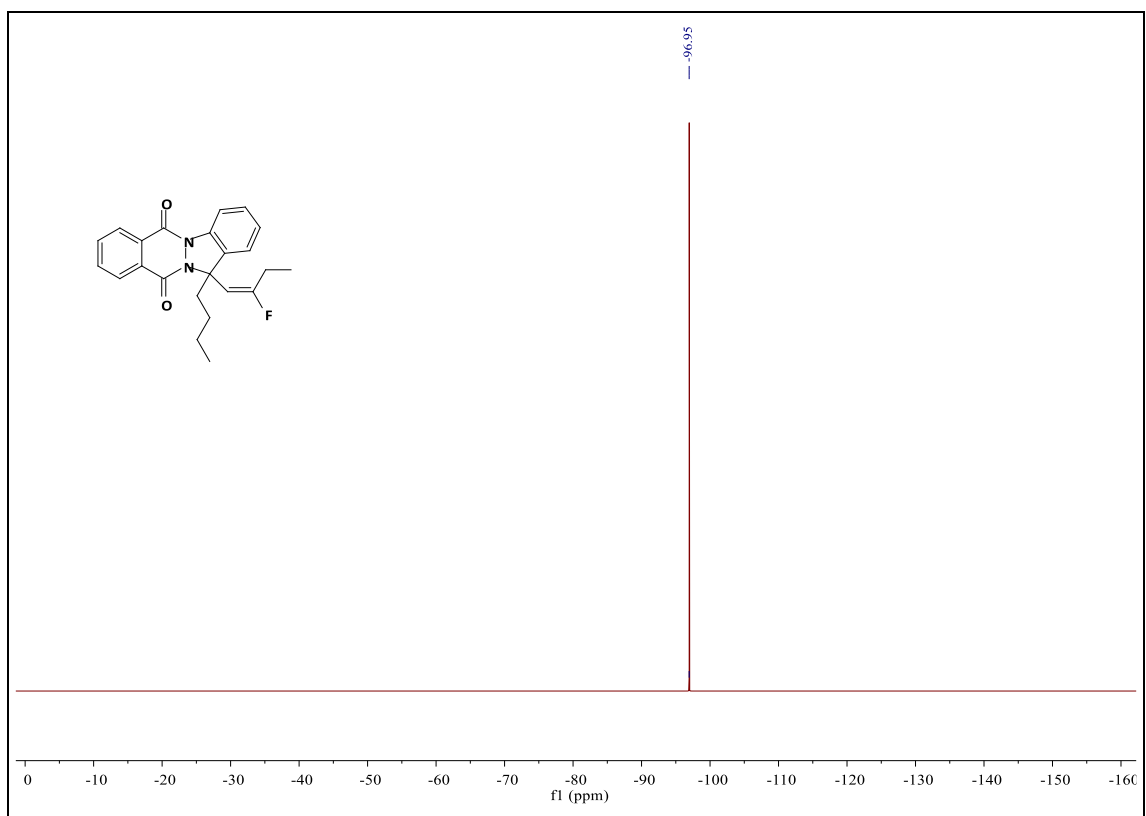

[illegible]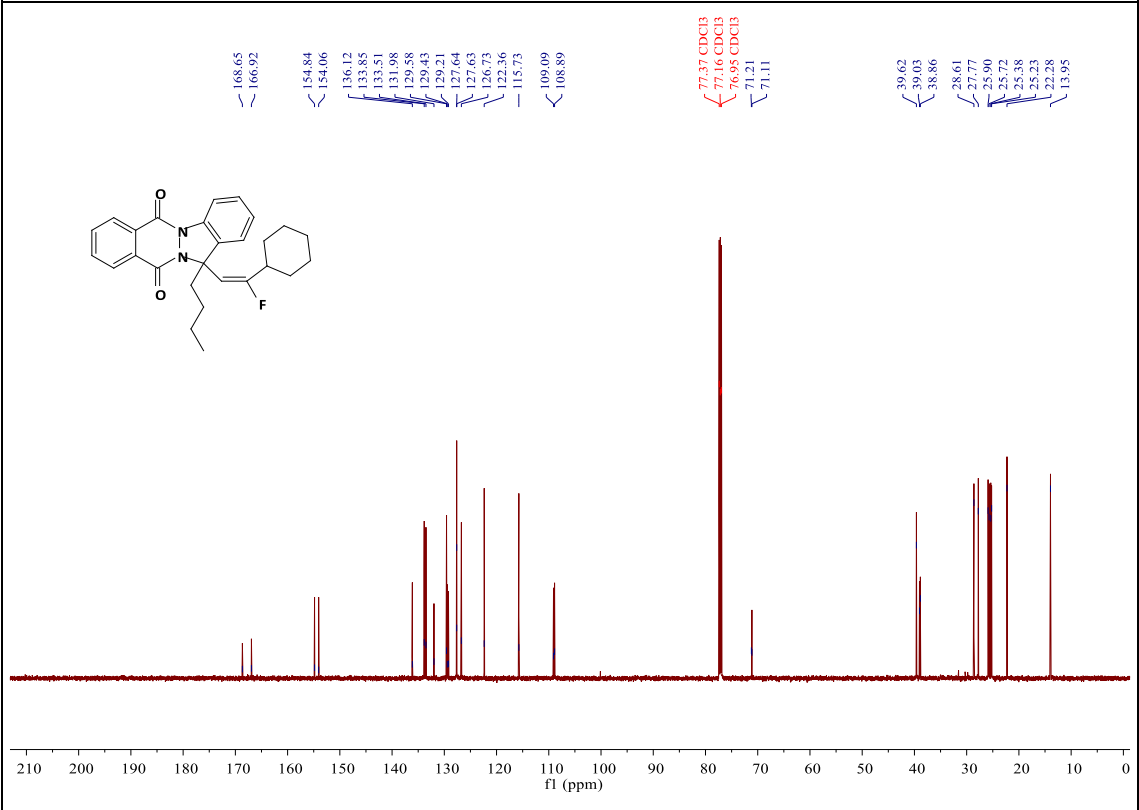

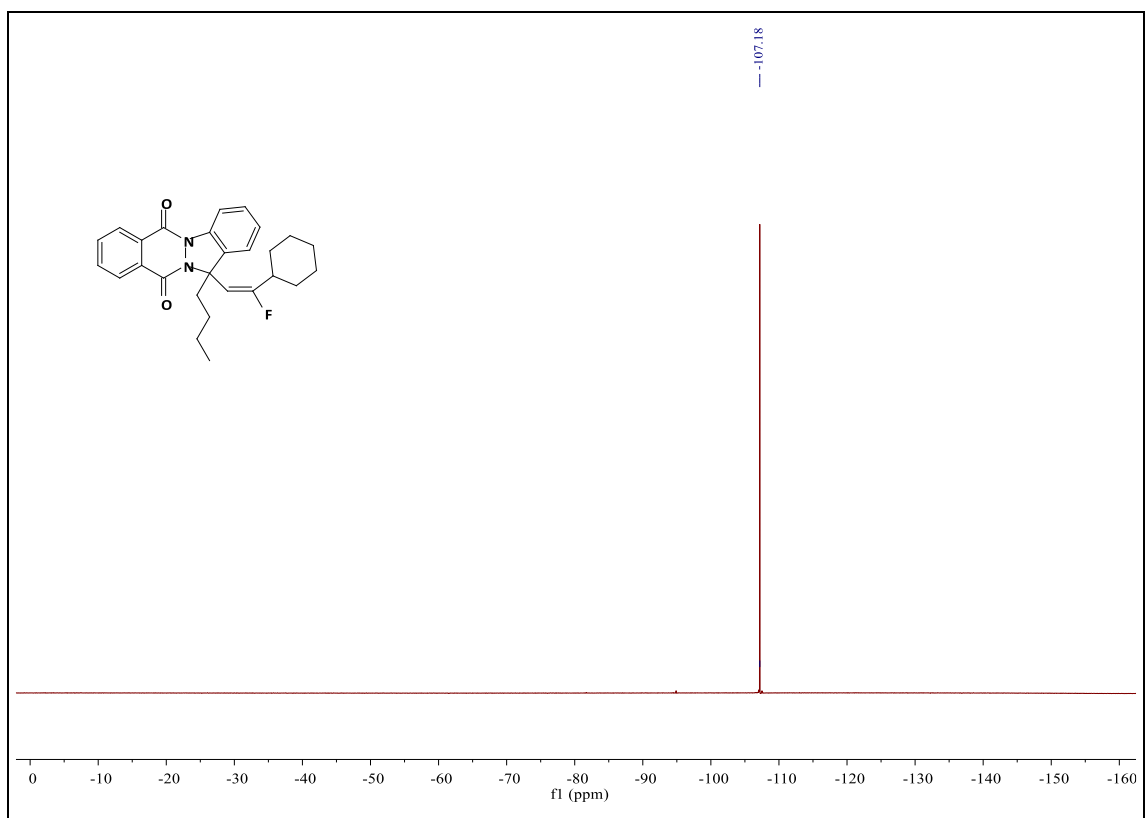

**(E)-5-(13-butyl-6,11-dioxo-6,11-dihydro-13H-indazolo[1,2-b]phthalazin-13-yl)-4-fluoropent-4-en-1-yl acetate (3y)**

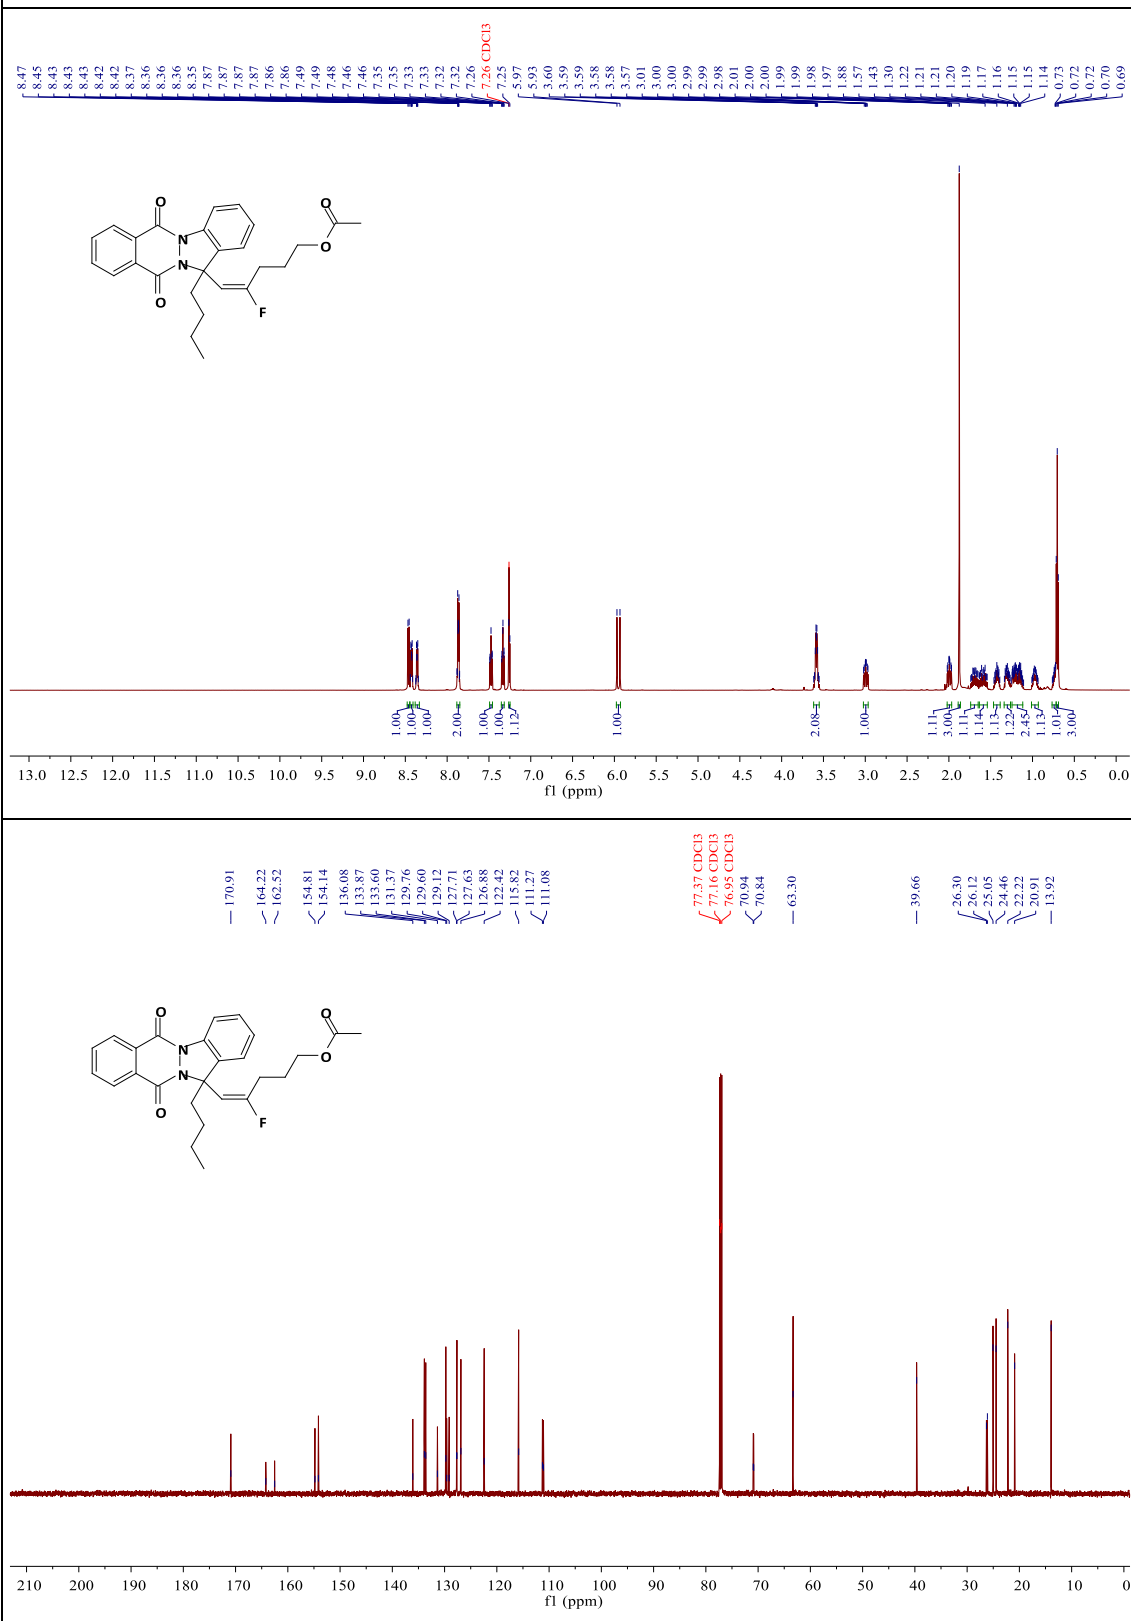

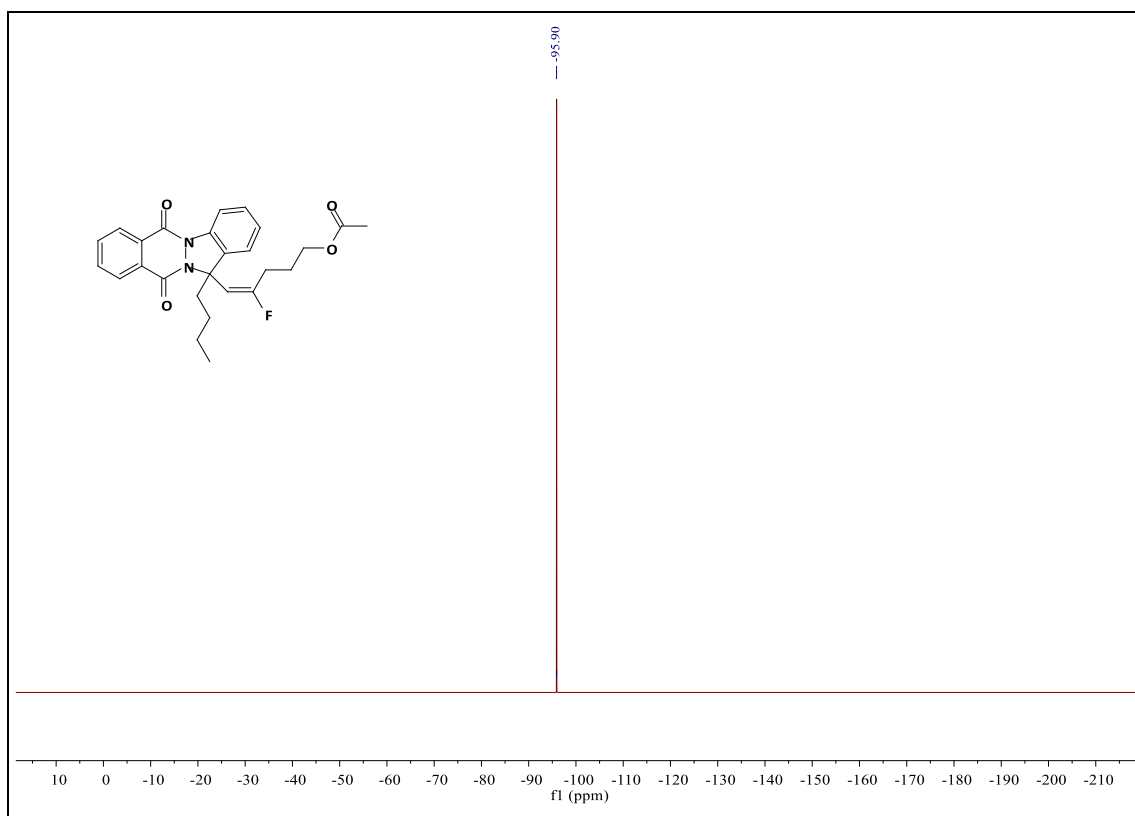



**(E)-13-butyl-13-(5-(1,3-dioxisoindolin-2-yl)-2-fluoropent-1-en-1-yl)-13H-indazolo[1,2-b]phthalazine-6,11-dione (3z)**

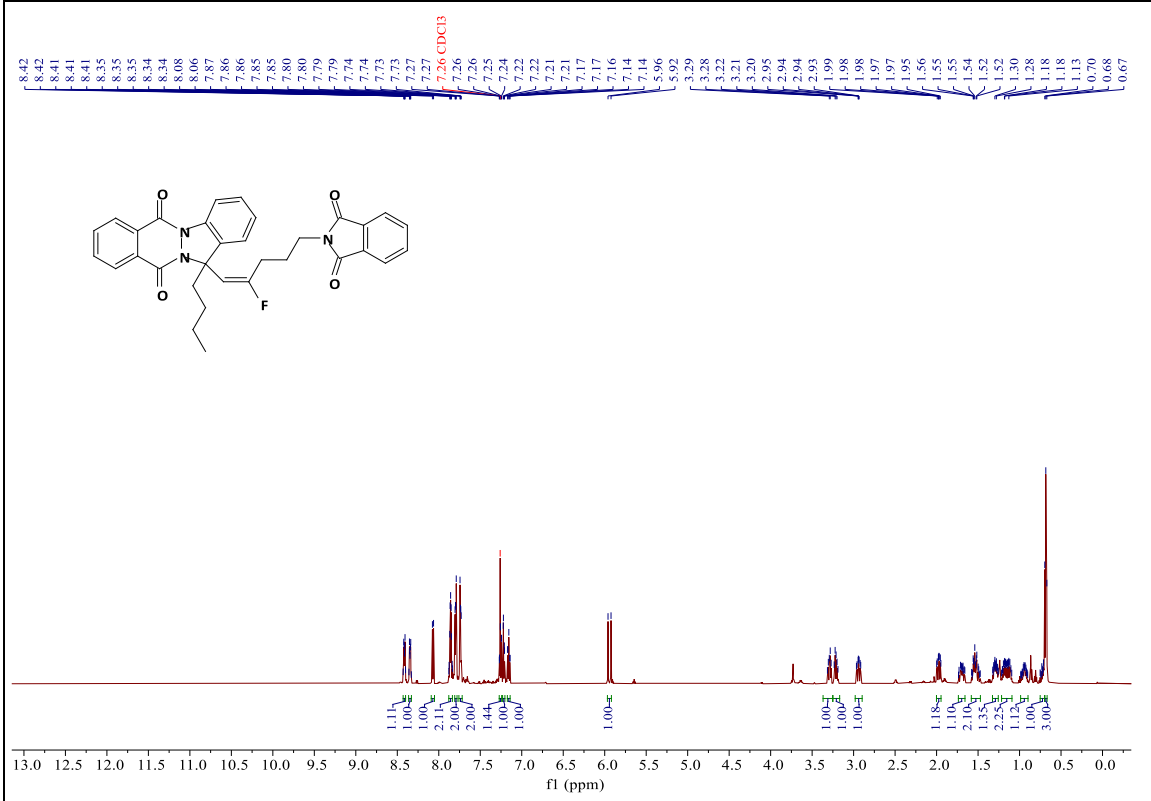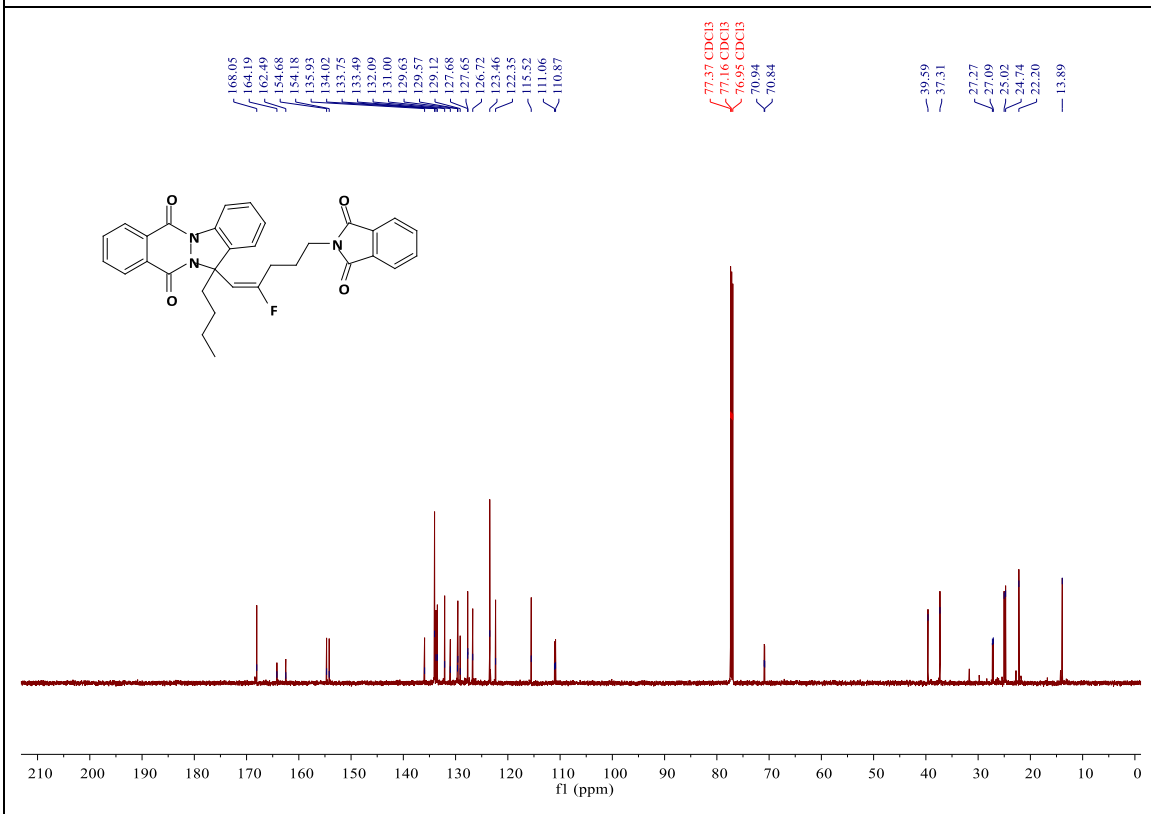

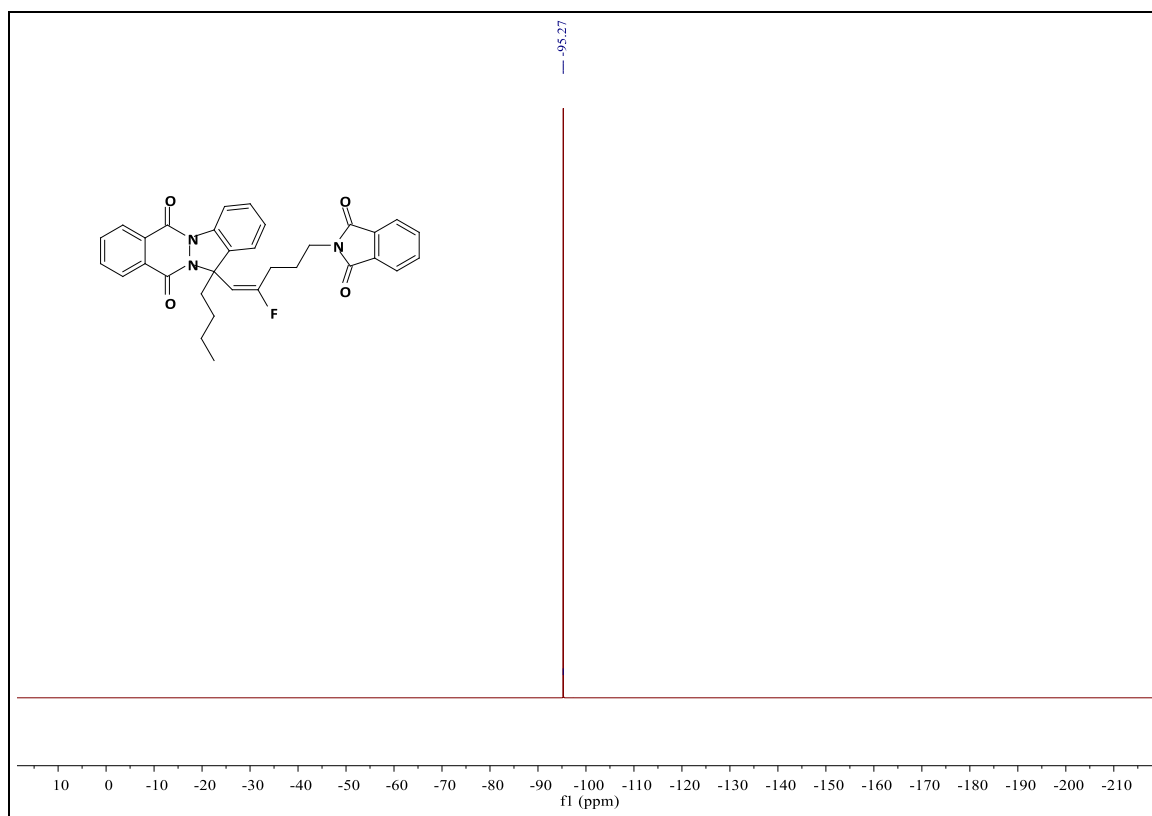

[illegible]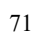

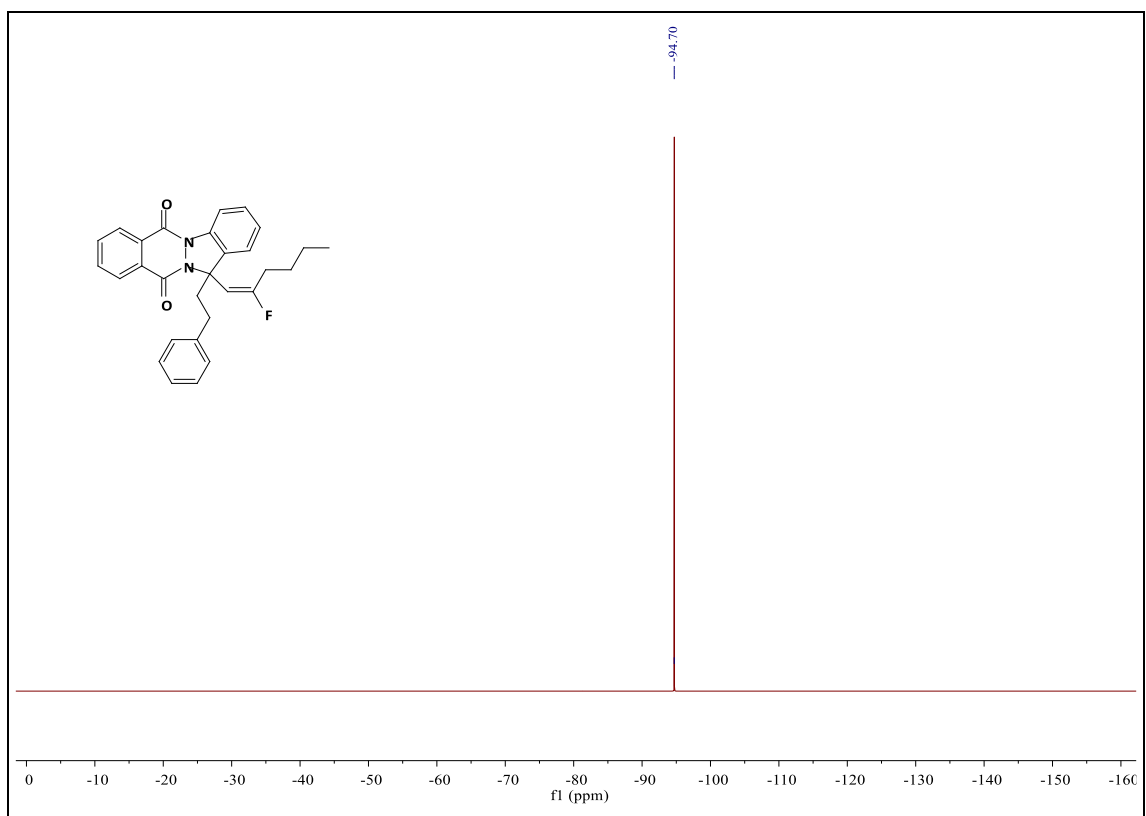

Chemical structure: CC1(C#CC2=CC=CC=C2)N2C(=O)c3ccccc3C1=O

<sup>1</sup>H NMR spectrum (CDCl<sub>3</sub>) showing chemical shifts (ppm) and integration values.

| Chemical Shift (ppm) | Integration |
|----------------------|-------------|
| 8.47                 | 1.00        |
| 8.46                 | 2.00        |
| 8.44                 | 2.04        |
| 8.43                 | 2.00        |
| 8.42                 | 1.00        |
| 8.41                 | 3.42        |
| 8.40                 | 1.00        |
| 8.39                 | 1.00        |
| 8.38                 | 2.43        |
| 8.37                 | 1.06        |
| 8.36                 | 1.02        |
| 8.35                 | 3.00        |
| 8.34                 |             |
| 8.33                 |             |
| 8.32                 |             |
| 8.31                 |             |
| 8.30                 |             |
| 8.29                 |             |
| 8.28                 |             |
| 8.27                 |             |
| 8.26                 |             |
| 8.25                 |             |
| 8.24                 |             |
| 8.23                 |             |
| 8.22                 |             |
| 8.21                 |             |
| 8.20                 |             |
| 8.19                 |             |
| 8.18                 |             |
| 8.17                 |             |
| 8.16                 |             |
| 8.15                 |             |
| 8.14                 |             |
| 8.13                 |             |
| 8.12                 |             |
| 8.11                 |             |
| 8.10                 |             |
| 8.09                 |             |
| 8.08                 |             |
| 8.07                 |             |
| 8.06                 |             |
| 8.05                 |             |
| 8.04                 |             |
| 8.03                 |             |
| 8.02                 |             |
| 8.01                 |             |
| 8.00                 |             |
| 7.99                 |             |
| 7.98                 |             |
| 7.97                 |             |
| 7.96                 |             |
| 7.95                 |             |
| 7.94                 |             |
| 7.93                 |             |
| 7.92                 |             |
| 7.91                 |             |
| 7.90                 |             |
| 7.89                 |             |
| 7.88                 |             |
| 7.87                 |             |
| 7.86                 |             |
| 7.85                 |             |
| 7.84                 |             |
| 7.83                 |             |
| 7.82                 |             |
| 7.81                 |             |
| 7.80                 |             |
| 7.79                 |             |
| 7.78                 |             |
| 7.77                 |             |
| 7.76                 |             |
| 7.75                 |             |
| 7.74                 |             |
| 7.73                 |             |
| 7.72                 |             |
| 7.71                 |             |
| 7.70                 |             |
| 7.69                 |             |
| 7.68                 |             |
| 7.67                 |             |
| 7.66                 |             |
| 7.65                 |             |
| 7.64                 |             |
| 7.63                 |             |
| 7.62                 |             |
| 7.61                 |             |
| 7.60                 |             |
| 7.59                 |             |
| 7.58                 |             |
| 7.57                 |             |
| 7.56                 |             |
| 7.55                 |             |
| 7.54                 |             |
| 7.53                 |             |
| 7.52                 |             |
| 7.51                 |             |
| 7.50                 |             |
| 7.49                 |             |
| 7.48                 |             |
| 7.47                 |             |
| 7.46                 |             |
| 7.45                 |             |
| 7.44                 |             |
| 7.43                 |             |
| 7.42                 |             |
| 7.41                 |             |
| 7.40                 |             |
| 7.39                 |             |
| 7.38                 |             |
| 7.37                 |             |
| 7.36                 |             |
| 7.35                 |             |
| 7.34                 |             |
| 7.33                 |             |
| 7.32                 |             |
| 7.31                 |             |
| 7.30                 |             |
| 7.29                 |             |
| 7.28                 |             |
| 7.27                 |             |
| 7.26                 |             |
| 7.25                 |             |
| 7.24                 |             |
| 7.23                 |             |
| 7.22                 |             |
| 7.21                 |             |
| 7.20                 |             |
| 7.19                 |             |
| 7.18                 |             |
| 7.17                 |             |
| 7.16                 |             |
| 7.15                 |             |
| 7.14                 |             |
| 7.13                 |             |
| 7.12                 |             |
| 7.11                 |             |
| 7.10                 |             |
| 7.09                 |             |
| 7.08                 |             |
| 7.07                 |             |
| 7.06                 |             |
| 7.05                 |             |
| 7.04                 |             |
| 7.03                 |             |
| 7.02                 |             |
| 7.01                 |             |
| 7.00                 |             |
| 6.99                 |             |
| 6.98                 |             |
| 6.97                 |             |
| 6.96                 |             |
| 6.95                 |             |
| 6.94                 |             |
| 6.93                 |             |
| 6.92                 |             |
| 6.91                 |             |
| 6.90                 |             |
| 6.89                 |             |
| 6.88                 |             |
| 6.87                 |             |
| 6.86                 |             |
| 6.85                 |             |
| 6.84                 |             |
| 6.83                 |             |
| 6.82                 |             |
| 6.81                 |             |
| 6.80                 |             |
| 6.79                 |             |
| 6.78                 |             |
| 6.77                 |             |
| 6.76                 |             |
| 6.75                 |             |
| 6.74                 |             |
| 6.73                 |             |
| 6.72                 |             |
| 6.71                 |             |
| 6.70                 |             |
| 6.69                 |             |
| 6.68                 |             |
| 6.67                 |             |
| 6.66                 |             |
| 6.65                 |             |
| 6.64                 |             |
| 6.63                 |             |
| 6.62                 |             |
| 6.61                 |             |
| 6.60                 |             |
| 6.59                 |             |
| 6.58                 |             |
| 6.57                 |             |
| 6.56                 |             |
| 6.55                 |             |
| 6.54                 |             |
| 6.53                 |             |
| 6.52                 |             |
| 6.51                 |             |
| 6.50                 |             |
| 6.49                 |             |
| 6.48                 |             |
| 6.47                 |             |
| 6.46                 |             |
| 6.45                 |             |
| 6.44                 |             |
| 6.43                 |             |
| 6.42                 |             |
| 6.41                 |             |
| 6.40                 |             |
| 6.39                 |             |
| 6.38                 |             |

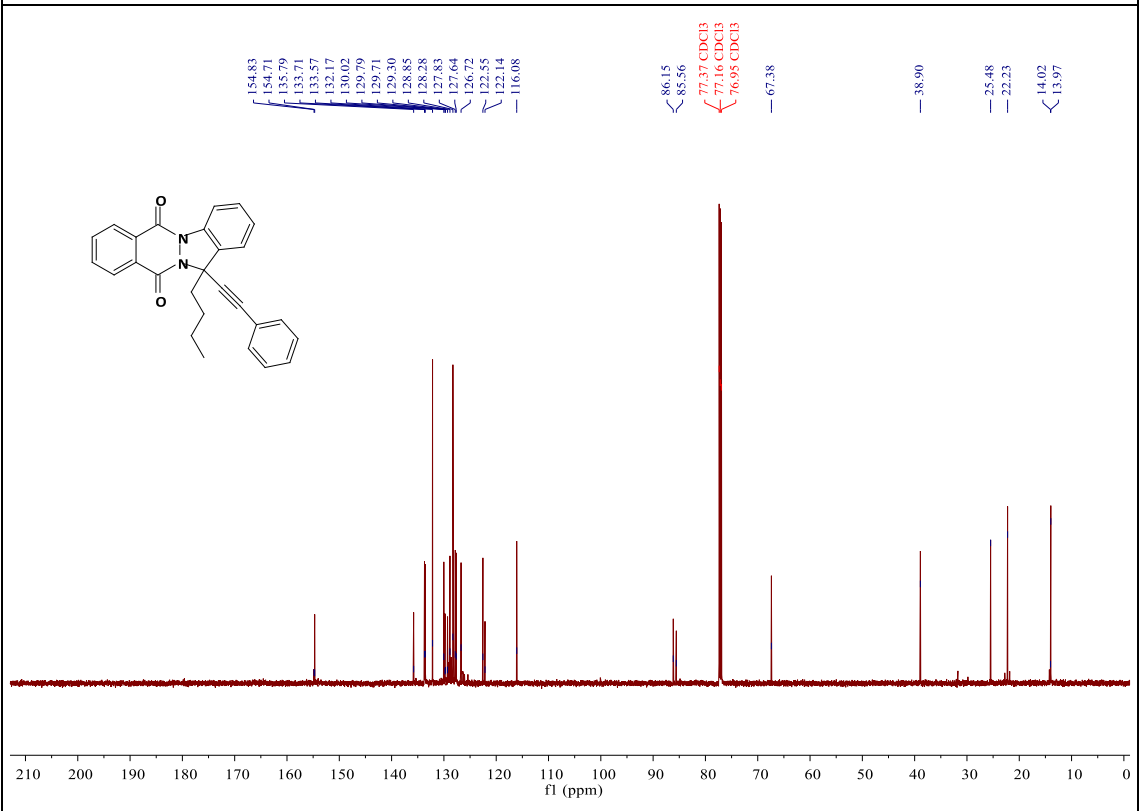

Supplement: d5ob01380a1.pdf [file d5ob01380a1.pdf]
